# Supplementary material for: Prins cyclization of 1,3-dioxinone: synthesis of 11-epi-badkhysin
Source: Royal Society of Chemistry journal article supplement (doi:10.1039/d4qo00162a), 2024-01-01
Supplement: d4qo00162a1.pdf [file d4qo00162a1.pdf]

## Electronic Supplementary Information

### Prins Cyclization of 1,3-Dioxinone: Synthesis of 11-*Epi*- Badkhysin

Xiaoliang Xu, Ping Hua, Yiren Xu, Baoqing He, Jingfeng Zhao, Liang Li, Wen  
Chen,\* and Hongbin Zhang\*

*Key Laboratory of Medicinal Chemistry for Natural Resource, Ministry of Education,  
Yunnan Key Laboratory of Research and Development for Natural Products, Yunnan  
Characteristic Plant Extraction Laboratory, School of Pharmacy, Yunnan University,  
Kunming, 650500, P. R. China*

\*Correspondence to: zhanghb@ynu.edu.cn. wenchen@ynu.edu.cn

#### Table of Contents

|                                                               |           |
|---------------------------------------------------------------|-----------|
| <b>1. General Information .....</b>                           | <b>S3</b> |
| <b>2. Experimental Section .....</b>                          | <b>S4</b> |
| 2.1 Synthesis of Secondary Alcohol <b>14</b> .....            | S4        |
| 2.2 Synthesis of Hemiketone <b>15</b> .....                   | S5        |
| 2.3 Synthesis of Ketone <b>16</b> .....                       | S6        |
| 2.4 Synthesis of Alcohol <b>17</b> .....                      | S7        |
| 2.5 Synthesis of Hemiketone <b>18</b> .....                   | S8        |
| 2.6 Optimization for the Prins Cyclization of <b>18</b> ..... | S9        |
| 2.7 Synthesis of Ether <b>19</b> .....                        | S9        |
| 2.8 Synthesis of Alcohol <b>20</b> .....                      | S10       |
| 2.9 Synthesis of Ketone <b>9</b> .....                        | S11       |
| 2.10 Synthesis of Ester <b>S1</b> .....                       | S12       |
| 2.11 Synthesis of Alcohol <b>S2</b> .....                     | S13       |
| 2.12 Synthesis of Lactone <b>22</b> .....                     | S14       |

|                                                                                    |             |
|------------------------------------------------------------------------------------|-------------|
| 2.13 Synthesis of Alcohol <b>23</b> .....                                          | S15         |
| 2.14 Synthesis of Ketone <b>S3</b> .....                                           | S16         |
| 2.15 Synthesis of Ketone <b>24</b> .....                                           | S17         |
| 2.16 Synthesis of Alcohol <b>25</b> .....                                          | S18         |
| 2.17 Synthesis of Alcohol <b>26</b> .....                                          | S18         |
| 2.18 Synthesis of Diene <b>28</b> .....                                            | S19         |
| 2.19 Synthesis of Ester <b>S4</b> .....                                            | S20         |
| 2.20 Synthesis of Alcohol <b>30</b> .....                                          | S21         |
| 2.21 Hydrolysis of Alcohol <b>30</b> .....                                         | S22         |
| 2.22 Synthesis of Ketone <b>31</b> .....                                           | S23         |
| 2.23 Synthesis of Alcohol <b>29</b> .....                                          | S24         |
| 2.24 Synthesis of Ester <b>S5</b> .....                                            | S25         |
| 2.25 Synthesis of Alcohol <b>33</b> .....                                          | S26         |
| 2.26 Synthesis of Silyl Ether <b>34</b> .....                                      | S26         |
| 2.27 Synthesis of Unsaturated Ketone <b>35</b> .....                               | S27         |
| 2.28 Synthesis of enone <b>36</b> .....                                            | S28         |
| 2.29 Synthesis of $\alpha$ -methyl Lactone <b>37</b> .....                         | S29         |
| 2.30 Synthesis of Alcohol <b>38</b> .....                                          | S30         |
| 2.31 Studies on the Epimerization of the C-11 Stereochemistry from <b>37</b> ..... | S31         |
| 2.32 Studies on the Methylenation of C-11 Position from <b>36</b> .....            | S32         |
| 2.33 Studies on the Methylation of C11 Position from <b>23</b> .....               | S32         |
| 2.34 Studies on the Methylation of C11 Position from <b>30</b> .....               | S33         |
| 2.35 Synthesis of 11- <i>epi</i> -badkhysin <b>40</b> .....                        | S34         |
| <b>3. Spectral Data Comparison</b> .....                                           | <b>S35</b>  |
| <b>4. X-Ray Single Crystal Diffraction Data</b> .....                              | <b>S37</b>  |
| 4.1 Compound <b>19</b> (CCDC: 2322258) .....                                       | S37         |
| 4.2 Compound <b>23</b> (CCDC: 2322305) .....                                       | S39         |
| 4.3 Compound <b>26</b> (CCDC: 2322268) .....                                       | S41         |
| 4.4 Compound <b>33</b> (CCDC: 2324246) .....                                       | S42         |
| 4.5 Compound <b>38</b> (CCDC: 2324247) .....                                       | S44         |
| <b>5. Copies of <sup>1</sup>H NMR, <sup>13</sup>C NMR and 2D NMR Spectra</b> ..... | <b>S47</b>  |
| <b>6. Supplementary References</b> .....                                           | <b>S111</b> |

## 1. General Information

Unless otherwise stated, all chemicals were purchased from commercial suppliers without further purification. Anhydrous MeOH, EtOH and DMF solvents were directly purchased from commercial suppliers, other anhydrous solvents were distilled prior to use (THF and Et<sub>2</sub>O were distilled from metallic sodium/benzophenone; DCM, DCE, pyridine and MeCN were distilled from CaH<sub>2</sub>). All reactions were conducted in dried glassware, and reaction temperatures refer to the external temperature and are uncorrected. Microwave-assisted heating reactions were conducted on a CEM DISCOVER SP microwave synthesizer. Reaction progress was monitored by thin-layer chromatography (TLC). Silica gel (200 – 300 mesh) for column chromatography and silica GF<sub>254</sub> for TLC were obtained from Merck Chemicals Co. Ltd. (Shanghai). The boiling range of petroleum ether for column chromatography is 60 – 90 °C. Yields are isolated yields unless otherwise mentioned.

All synthetic new compounds were characterized by melting point (crystal), optical rotation, <sup>1</sup>H NMR, <sup>13</sup>C NMR and HRMS. The melting points were measured on a Hanon MP 430 auto melting-point system and were uncorrected. The optical rotations were recorded on a JASCO P-2000 polarimeter. <sup>1</sup>H NMR and <sup>13</sup>C NMR spectra were recorded on Bruker Avance 400 (<sup>1</sup>H NMR: 400 MHz, <sup>13</sup>C NMR: 100 MHz) or Bruker Avance 600 (<sup>1</sup>H NMR: 600 MHz, <sup>13</sup>C NMR: 150 MHz) spectrometers and calibrated using undeuterated solvent as an internal reference (CHCl<sub>3</sub>, δ 7.26 ppm <sup>1</sup>H NMR, δ 77.16 ppm <sup>13</sup>C NMR; MeOH, δ 3.31 ppm <sup>1</sup>H NMR, δ 49 ppm <sup>13</sup>C NMR); The following abbreviations were used to explain the multiplicities: s = singlet, d = doublet, t = triplet, q = quartet, m = multiplet, br = broad. To make copies of the <sup>1</sup>H-NMR spectra as clear as possible, multiplet peaks mark only the three major peaks. High Resolution Mass spectra (HRMS) were taken on AB QSTAR Pulsar mass spectrometer or Agilent LC/MSD TOF mass spectrometer.

## 2. Experimental Section

### 2.1 Synthesis of Secondary Alcohol **14**

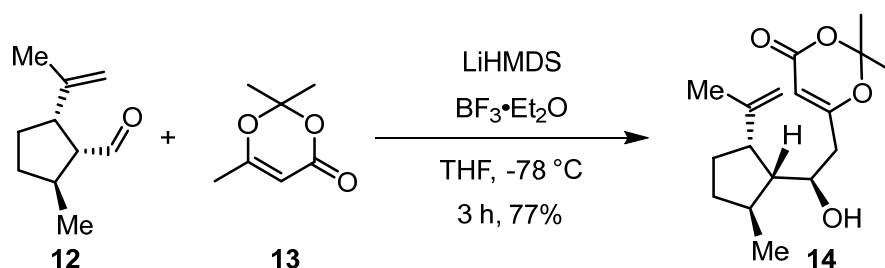

The starting material (1*R*,2*S*,5*S*)-2-methyl-5-(prop-1-en-2-yl)cyclopentane-1-carbaldehyde (**12**) was prepared from the commercially available (*S*)-Carvone according to the procedure reported by Meyer.<sup>1</sup>

To a solution of aldehyde **12** (10.00 g, 66.0 mmol) in anhydrous THF (220 mL) was added BF<sub>3</sub>•Et<sub>2</sub>O (8.25 mL, 66.0 mmol) at -78 °C. In the meantime, to a stirred solution of dioxinone **13** (18.7 g, 131.0 mmol) in THF (300 mL) was added lithium bis(trimethylsilyl)amide (1.0 M in THF, 131 mL, 131.0 mmol) at -78 °C. The resulting mixtures were stirred respectively at -78 °C for 1 hour. The solution of dioxinone-derived lithium dienolate was cannulated to the solution of aldehyde at -78 °C. The reaction mixture was allowed to stir at -78 °C for 2 hours. After TLC analysis, the reaction was quenched with a saturated aqueous solution of NH<sub>4</sub>Cl (300 mL) at -78 °C. The resulting mixture was then diluted with water (300 mL), and extracted with EtOAc (3×500 mL). The combined organic phases were washed with brine (400 mL), dried over anhydrous Na<sub>2</sub>SO<sub>4</sub>, filtered, and concentrated under reduced pressure. The residue was purified by column chromatography on silica gel (petroleum ether/EtOAc = 10:1) to give secondary alcohol **14** (14.9 g, 77%, a single diastereoisomer) as colorless oil.

*R<sub>f</sub>* = 0.43 (petroleum ether : ethyl acetate = 5:1).

[α]<sub>D</sub><sup>20</sup> = +9.9 (*c* 0.25, CHCl<sub>3</sub>).

<sup>1</sup>H NMR (400 MHz, CDCl<sub>3</sub>): δ 5.32 (s, 1H), 4.94 (s, 1H), 4.86 (s, 1H), 4.02 – 3.97 (m, 1H), 2.60 – 2.54 (m, 1H), 2.41 (dd, *J* = 14.8, 9.2 Hz, 1H), 2.31 – 2.24 (m, 2H), 2.04 – 1.97 (m, 1H), 1.83 (s, 3H), 1.76 – 1.71 (m, 2H), 1.69 (s, 3H), 1.67 (s, 3H), 1.65 – 1.62 (m, 1H), 1.19 – 1.12 (m, 1H), 1.09 (d, *J* = 6.88 Hz, 3H).

$^{13}\text{C}$  NMR (100 MHz,  $\text{CDCl}_3$ ):  $\delta$  169.76, 161.36, 147.77, 110.60, 106.61, 94.87, 69.20, 52.12, 50.16, 39.49, 34.80, 32.29, 30.87, 25.45, 24.91, 24.21, 23.31.

HRMS (ESI): Calcd for  $\text{C}_{17}\text{H}_{27}\text{O}_4$   $[\text{M}+\text{H}]^+$ : 295.1904, found: 295.1902

## 2.2 Synthesis of Hemiketone 15

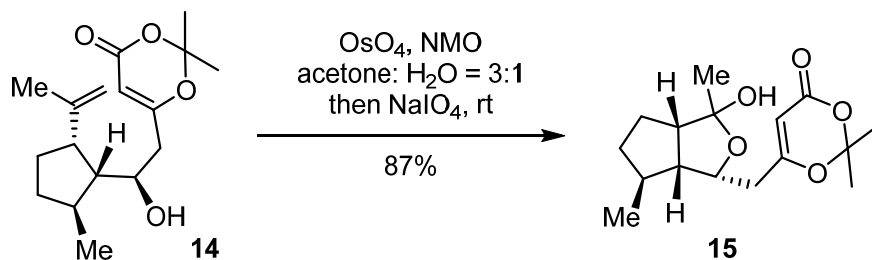

To a solution of alcohol **14** (20.0 mg, 0.07 mmol) in a mixed solvent (0.68 mL, acetone:  $\text{H}_2\text{O}$  = 3:1) was added NMO (9.6 mg, 0.082 mmol) and  $\text{OsO}_4$  (0.35 mg, 20 mg/mL in  $\text{H}_2\text{O}$ , 0.001 mmol) at room temperature. After being stirred at ambient temperature for 12 hours,  $\text{NaIO}_4$  (43.6 mg, 0.2 mmol) was added. The reaction mixture was then stirred for another 5 hours. Upon completion, the suspension was filtered and the residue was washed with EtOAc (3 $\times$ 5 mL). The combined organic phases were successively washed with saturated aqueous solution of  $\text{Na}_2\text{S}_2\text{O}_3$  (10 mL), brine (10 mL), and the organic phases were dried over anhydrous  $\text{Na}_2\text{SO}_4$ . After removal of the solvents under reduced pressure, the residue was purified by column chromatography on silica gel (petroleum ether/EtOAc = 5:1) to give acid sensitive hemiketone **15** (17.6 mg, 87%) as a yellow oil.

$R_f$  = 0.56 (petroleum ether : ethyl acetate = 5:1).

$[\alpha]_D^{20}$  = +94.3 ( $c$  0.12, MeOH).

$^1\text{H}$  NMR (400 MHz,  $\text{CDCl}_3$ )  $\delta$  5.39 (s, 1H), 4.47 (q,  $J$  = 6.8 Hz, 1H), 2.68 (q,  $J$  = 8.8 Hz, 1H), 2.47 (d,  $J$  = 6.4 Hz, 2H), 2.30 – 2.24 (m, 1H), 2.01 (s, 1H), 1.84 – 1.73 (m, 3H), 1.68 (d,  $J$  = 2.4 Hz, 6H), 1.43 (s, 3H), 1.32 – 1.26 (m, 1H), 1.19 – 1.11 (m, 1H), 0.99 (d,  $J$  = 6.4 Hz, 3H).

$^{13}\text{C}$  NMR (100 MHz,  $\text{CDCl}_3$ )  $\delta$  169.86, 161.53, 106.61, 105.44, 94.59, 73.74, 54.71, 53.91, 36.70, 35.27, 34.89, 29.02, 25.50, 24.85, 24.51, 20.51.

**HRMS** (ESI): Calcd for C<sub>16</sub>H<sub>25</sub>O<sub>5</sub> [M+H]<sup>+</sup>: 297.1697, found: 297.1694.

### 2.3 Synthesis of Ketone 16

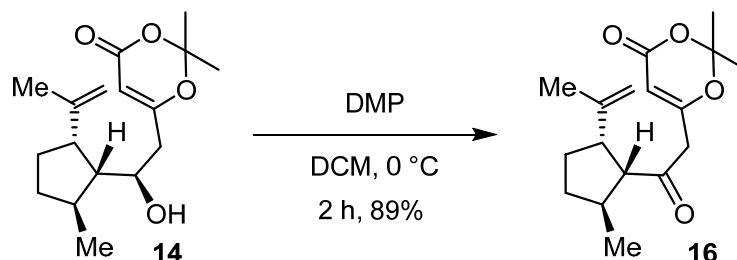

Dess-Martin periodinane (24.20 g, 57 mmol) was added to a solution of secondary alcohol **14** (14 g, 47 mmol) in DCM (317 mL) at 0 °C. After addition, the reaction mixture was stirred at this temperature for 2 hours. After TLC analysis, a saturated aqueous solution of Na<sub>2</sub>S<sub>2</sub>O<sub>3</sub> (200 mL) was added slowly, and the resulting suspension was stirred for another 30 minutes. The resulting mixture was then extracted with DCM (3×200 mL). The combined organic phases were washed with brine (500 mL) and dried over Na<sub>2</sub>SO<sub>4</sub>. After removal of the solvents under reduced pressure, the residue was purified by column chromatography on silica gel (petroleum ether/EtOAc = 10:1) to give ketone **16** (12.40 g, 89%) as a white solid.

**M.p.** = 46.2 – 48.3 °C

**R<sub>f</sub>** = 0.64 (petroleum ether : ethyl acetate = 5:1).

**[α]<sub>D</sub><sup>20</sup>** = –37.5 (*c* 0.16, CHCl<sub>3</sub>).

**<sup>1</sup>H NMR** (600 MHz, CDCl<sub>3</sub>) δ 5.27 (s, 1H), 4.81 (s, 1H), 4.76 (s, 1H), 3.34 (d, *J* = 16.4 Hz, 1H), 3.23 (d, *J* = 16.4 Hz, 1H), 3.03 (q, *J* = 9.0 Hz, 1H), 2.68 (t, *J* = 8.4 Hz, 1H), 2.48 – 2.39 (m, 1H), 2.03 – 1.98 (m, 1H), 1.89 – 1.84 (m, 1H), 1.77 – 1.72 (m, 1H), 1.69 (d, *J* = 4.6 Hz, 6H), 1.67 (s, 3H), 1.24 – 1.17 (m, 1H), 1.00 (d, *J* = 6.6 Hz, 3H).

**<sup>13</sup>C NMR** (150 MHz, CDCl<sub>3</sub>) δ 205.05, 165.21, 161.06, 145.54, 113.14, 107.21, 96.63, 63.55, 50.22, 47.99, 36.01, 33.71, 30.30, 25.33, 25.00, 21.69, 20.80.

**HRMS** (ESI): Calcd for C<sub>17</sub>H<sub>25</sub>O<sub>4</sub> [M+H]<sup>+</sup>: 293.1747, found: 293.1744.

## 2.4 Synthesis of Alcohol 17

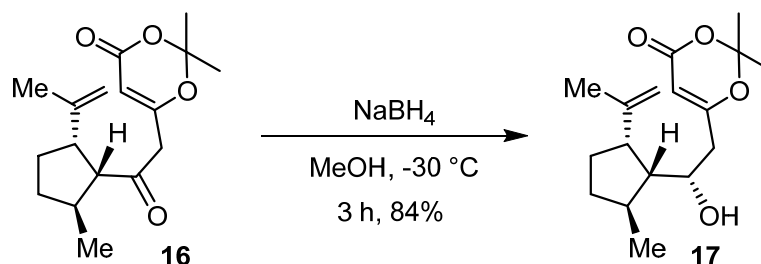

To a stirred solution of ketone **16** (12.00 g, 41 mmol) in  $\text{MeOH}$  (205 mL) was added  $\text{NaBH}_4$  (2.33 g, 61.6 mmol) in one portion at  $-30\text{ }^\circ\text{C}$ , and the resultant mixture was then stirred at this temperature for 3 hours. Upon completion, the reaction was carefully quenched with saturated aqueous solution of  $\text{NH}_4\text{Cl}$  (100 mL) and diluted with water (100 mL). The mixture was extracted with DCM ( $3 \times 300\text{ mL}$ ). The combined organic phases were washed with brine (500 mL), dried over anhydrous  $\text{Na}_2\text{SO}_4$ , filtered and concentrated under reduced pressure. The residue was purified by flash column chromatography on silica gel (petroleum ether/ $\text{EtOAc}$  = 10:1 to 5:1) to afford secondary alcohol **17** (10.08 g, 84%) as a colorless oil.

$R_f$  = 0.41 (petroleum ether : ethyl acetate = 5:1).

$[\alpha]_D^{20} = -48.8$  ( $c$  0.14,  $\text{CHCl}_3$ ).

$^1\text{H NMR}$  (400 MHz,  $\text{CDCl}_3$ )  $\delta$  5.29 (s, 1H), 4.87 (s, 2H), 3.81 (td,  $J$  = 10.0, 2.8 Hz, 1H), 2.64 – 2.57 (m, 2H), 2.46 (dd,  $J$  = 14.8, 2.4 Hz, 1H), 2.20 (dd,  $J$  = 14.4, 10.0 Hz, 1H), 1.98 – 1.91 (m, 1H), 1.85 (s, 3H), 1.83 – 1.78 (m, 1H), 1.77 – 1.72 (m, 1H), 1.72 – 1.68 (m, 1H), 1.65 (s, 3H), 1.63 (s, 3H), 1.15 – 1.10 (m, 1H), 1.02 (d,  $J$  = 6.8 Hz, 3H).

$^{13}\text{C NMR}$  (100 MHz,  $\text{CDCl}_3$ )  $\delta$  170.20, 161.44, 148.89, 111.80, 106.55, 94.93, 70.19, 55.50, 49.08, 39.14, 35.58, 33.38, 29.37, 25.61, 24.49, 23.97, 22.73.

**HRMS** (ESI): Calcd for  $\text{C}_{17}\text{H}_{27}\text{O}_4$   $[\text{M}+\text{H}]^+$ : 295.1904, found: 295.1904.

## 2.5 Synthesis of Hemiketone **18**

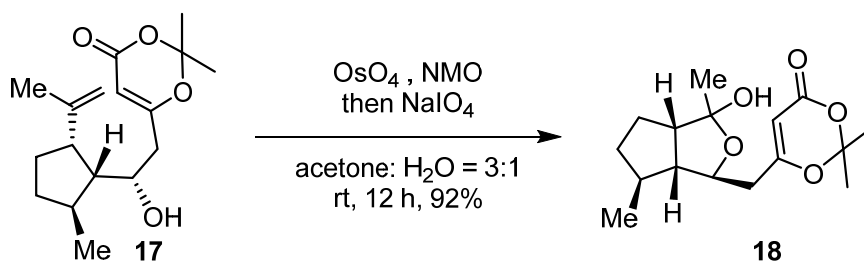

To a solution of alcohol **17** (10.00 g, 34 mmol) in a mixed solvent (230 mL, acetone:  $\text{H}_2\text{O} = 3:1$ ) was added NMO (4.78 g, 40.76 mmol),  $\text{OsO}_4$  (86 mg, 20 mg/mL in  $\text{H}_2\text{O}$ , 0.34 mmol) at room temperature. After being stirred at ambient temperature for 12 hours,  $\text{NaIO}_4$  (21.8 g, 102 mmol) was added. The reaction mixture was then stirred for another 5 hours. Upon completion, the suspension was filtered and the residue was washed with EtOAc (3×300 mL). The combined organic phases were successively washed with saturated aqueous solution of  $\text{Na}_2\text{S}_2\text{O}_3$  (800 mL) and brine (800 mL). The organic phases were dried over anhydrous  $\text{Na}_2\text{SO}_4$ . After removal of the solvents under reduced pressure, the residue was purified by column chromatography on silica gel (petroleum ether/EtOAc = 5:1) to give hemiketone **18** (9.20 g, 92%) as a white solid.

$R_f = 0.57$  (petroleum ether : ethyl acetate = 5:1).

$[\alpha]_D^{20} = -27.2$  ( $c$  0.54,  $\text{CHCl}_3$ ).

$^1\text{H NMR}$  (400 MHz,  $\text{CDCl}_3$ )  $\delta$  5.35 – 5.29 (m, 1H), 4.01 – 3.96 (m, 1H), 2.73 – 2.57 (m, 2H), 2.48 – 2.34 (m, 2H), 2.21 – 2.17 (m, 1H), 1.95 – 1.91 (m, 1H), 1.85 – 1.77 (m, 2H), 1.66 (s, 6H), 1.41 (s, 3H), 1.36 – 1.28 (m, 1H), 1.22 – 1.14 (m, 1H), 0.98 – 0.88 (m, 3H).

$^{13}\text{C NMR}$  (100 MHz,  $\text{CDCl}_3$ )  $\delta$  169.63, 169.19, 161.54, 161.46, 108.03, 106.63, 105.11, 94.94, 94.88, 83.09, 78.73, 59.39, 57.88, 54.63, 53.96, 43.07, 41.33, 39.78, 38.30, 36.37, 35.47, 28.60, 28.15, 25.50, 25.48, 24.82, 24.77, 24.73, 24.61, 20.62, 19.96.

**HRMS** (ESI): Calcd for  $\text{C}_{16}\text{H}_{24}\text{NaO}_5$   $[\text{M}+\text{Na}]^+$ : 319.1516, found: 319.1515.

## 2.6 Optimization for the Prins Cyclization of **18**

**Table S1** Optimization for the Prins Cyclization of **18**

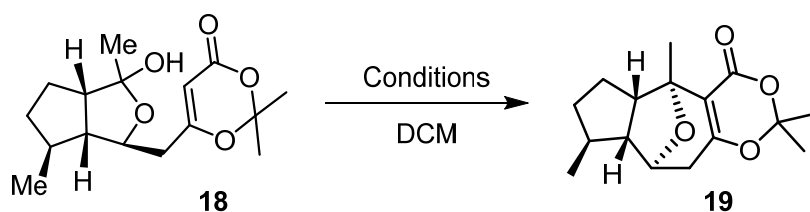

| Entry | Lewis Acids                                                | Additives                      | C (M) | T (°C) | Results <sup>a</sup> |
|-------|------------------------------------------------------------|--------------------------------|-------|--------|----------------------|
| 1     | BF <sub>3</sub> ·OEt <sub>2</sub> (1.2 eq.)                | -                              | 0.1   | RT     | 31 %                 |
| 2     | BF <sub>3</sub> ·OEt <sub>2</sub> (1.2 eq.)                | -                              | 0.08  | -20    | 52 %                 |
| 3     | BF <sub>3</sub> ·OEt <sub>2</sub> (1.2 eq.)                | -                              | 0.03  | 0      | 67 %                 |
| 4     | Sc(OTf) <sub>3</sub> (0.5 eq.)                             | -                              | 0.05  | -30    | 32 %                 |
| 5     | Yb(OTf) <sub>3</sub> (0.5 eq.)                             | -                              | 0.1   | 0      | 42 %                 |
| 6     | Cu(OTf) <sub>2</sub> (0.5 eq.)                             | -                              | 0.05  | -30    | 41 %                 |
| 7     | Fe(OTf) <sub>3</sub> (0.5 eq.)                             | -                              | 0.05  | -30    | 46 %                 |
| 8     | FeCl <sub>3</sub> -SiO <sub>2</sub> <sup>b</sup> (0.5 eq.) | -                              | 0.05  | -78    | NR                   |
| 9     | FeCl <sub>3</sub> (1.5 eq.)                                | MgSO <sub>4</sub> <sup>c</sup> | 0.03  | -30    | 75 %                 |
| 10    | FeCl <sub>3</sub> (1.5 eq.)                                | -                              | 0.05  | -30    | 67 %                 |
| 11    | FeCl <sub>3</sub> (0.3 eq.)                                | MgSO <sub>4</sub> <sup>c</sup> | 0.03  | -30    | 63 %                 |
| 12    | FeCl <sub>3</sub> -SiO <sub>2</sub> <sup>b</sup> (0.5 eq.) | -                              | 0.05  | -30    | 85 %                 |

<sup>a</sup> Isolated yield after purification by silica gel chromatography. <sup>b</sup> SiO<sub>2</sub>:FeCl<sub>3</sub> = 50:3 (m/m). <sup>c</sup> MgSO<sub>4</sub>:FeCl<sub>3</sub> = 10:1 (m/m).

## 2.7 Synthesis of Ether **19**

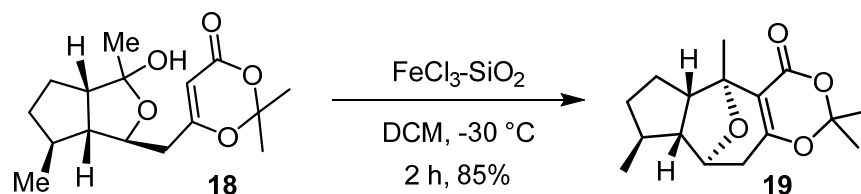

To a stirred solution of hemiketal **18** (9.00 g, 19.8 mmol) in DCM (660 mL) was added FeCl<sub>3</sub>-SiO<sub>2</sub> (64.00 g, FeCl<sub>3</sub> : SiO<sub>2</sub> = 3 : 50 m/m) in one portion at -30 °C. The brown mixture was stirred at -30 °C for 3 hours. Upon completion, the suspension The resulting suspension was filtered through a short column of silica gel and washed with

DCM (ca. 500 mL). The combined organic phases were washed with saturated aqueous solution of brine (800 mL), the organic phases were dried over anhydrous Na<sub>2</sub>SO<sub>4</sub>. After removal of the solvents under reduced pressure, the residue was purified by column chromatography on silica gel (petroleum ether/EtOAc = 10:1 to 5:1) to give ether **19** (4.68 g, 85%) as a white solid.

**M.p.** = 124.9 – 126.1 °C

**R<sub>f</sub>** = 0.51 (petroleum ether : ethyl acetate = 5:1).

**[α]<sub>D</sub><sup>20</sup>** = +98.1 (*c* 0.38, CHCl<sub>3</sub>).

**<sup>1</sup>H NMR** (600 MHz, CDCl<sub>3</sub>) δ 4.15 (d, *J* = 5.4 Hz, 1H), 2.81 (q, *J* = 9.0 Hz, 1H), 2.71 (dd, *J* = 18.6, 5.4 Hz, 1H), 2.02 (d, *J* = 18.0 Hz, 1H), 1.98 – 1.96 (m, 1H), 1.78 – 1.66 (m, 6H), 1.64 (s, 3H), 1.60 (s, 3H), 1.45 – 1.38 (m, 1H), 1.09 – 1.06 (m, 1H), 1.04 (d, *J* = 6.0 Hz, 3H).

**<sup>13</sup>C NMR** (150 MHz, CDCl<sub>3</sub>) δ 162.62, 159.16, 112.35, 105.61, 80.48, 78.94, 58.48, 58.16, 43.07, 36.22, 35.69, 28.12, 27.69, 22.11, 19.98, 18.51.

**HRMS** (ESI): Calcd for C<sub>16</sub>H<sub>23</sub>O<sub>4</sub> [M+H]<sup>+</sup>: 279.1591, found: 279.1589.

## 2.8 Synthesis of Alcohol **20**

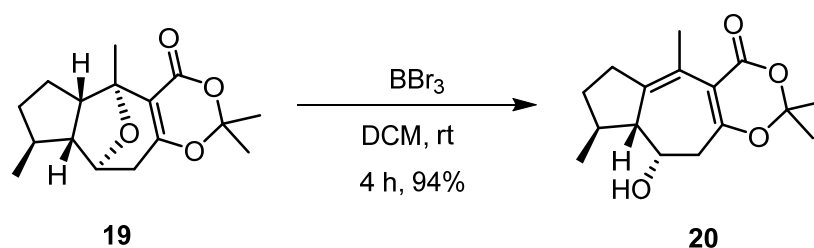

To a stirred solution of ether **19** (5.00 g, 17.96 mmol) in DCM (600 mL) was added BBr<sub>3</sub> (2.1 mL, 21.6 mmol) in one portion at ambient temperature and the mixture was stirred for 4 hours. Upon completion, MeOH (50 mL) was added to the reaction mixture and stirred for 10 minutes. The reaction was quenched with saturated aqueous solution of NaHCO<sub>3</sub> (500 mL) and extracted with DCM (3×500 mL). The combined organic phases were washed with brine (900 mL), dried over anhydrous Na<sub>2</sub>SO<sub>4</sub>, filtered, and concentrated under reduced pressure. The residue was purified by column

chromatography on silica gel (petroleum ether/EtOAc = 10:1 to 2:1) to give alcohol **20** (4.72 g, 94%) as a yellow oil.

$R_f$  = 0.32 (petroleum ether : ethyl acetate = 2:1).

$[\alpha]_D^{20} = -36.0$  ( $c$  0.34,  $\text{CHCl}_3$ ).

$^1\text{H}$  NMR (400 MHz,  $\text{CDCl}_3$ )  $\delta$  4.45 (br s, 1H), 2.56 – 2.45 (m, 2H), 2.35 – 2.23 (m, 3H), 2.16 (br s, 1H), 2.01 – 1.95 (m, 5H), 1.66 (s, 6H), 1.30 – 1.21 (m, 1H), 0.96 (d,  $J$  = 6.8 Hz, 3H).

$^{13}\text{C}$  NMR (100 MHz,  $\text{CDCl}_3$ )  $\delta$  165.26, 160.34, 145.05, 122.10, 108.73, 105.22, 79.67, 55.38, 40.71, 34.86, 34.07, 30.80, 25.48, 24.70, 20.41, 18.28.

HRMS (ESI): Calcd for  $\text{C}_{16}\text{H}_{23}\text{O}_4$   $[\text{M}+\text{H}]^+$ : 279.1591, found: 279.1587.

## 2.9 Synthesis of Ketone **9**

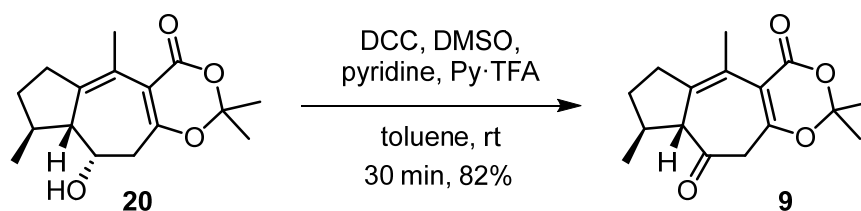

To a stirred solution of alcohol **20** (4.7 g, 16.9 mmol) in anhydrous toluene (340 mL) was sequentially added DCC (11.15 g, 54 mmol), pyridine (1.74 g, 22 mmol), DMSO (19.79 g, 253 mmol) and pyridinium trifluoroacetate (3.91 g, 20.3 mmol) at ambient temperature under nitrogen and the mixture was stirred for 30 minutes. Upon completion, the reaction was diluted with petroleum ether (300 mL). The suspension was filtered and the residue was washed with EtOAc (3×500 mL). The combined organic phases were washed with brine (900 mL), the organic phases were dried over anhydrous  $\text{Na}_2\text{SO}_4$ , filtered, and concentrated under reduced pressure. The residue was purified by column chromatography on silica gel (petroleum ether/EtOAc = 20:1 to 10:1) to give ketone **9** (3.82 g, 82%) as a brown oil.

$R_f$  = 0.57 (petroleum ether : ethyl acetate = 5:1).

$[\alpha]_D^{20} = -209.7$  ( $c$  0.29, MeOH).

**$^1\text{H}$  NMR** (600 MHz,  $\text{CDCl}_3$ )  $\delta$  3.35 (d,  $J$  = 16.8 Hz, 1H), 3.13 (d,  $J$  = 16.8 Hz, 1H), 2.72 (s, 1H), 2.69 - 2.65 (m, 1H), 2.56 – 2.51 (m, 1H), 2.28 – 2.23 (m, 1H), 2.04 (s, 3H), 1.88 – 1.83 (m, 1H), 1.73 (s, 3H), 1.68 (s, 3H), 1.41 – 1.35 (m, 1H), 1.03 (d,  $J$  = 7.2 Hz, 3H).

**$^{13}\text{C}$  NMR** (150 MHz,  $\text{CDCl}_3$ )  $\delta$  206.26, 160.27, 159.04, 139.89, 123.22, 110.07, 105.86, 64.62, 47.50, 34.17, 32.81, 29.90, 25.76, 24.58, 19.93, 18.69.

**HRMS** (ESI): Calcd for  $\text{C}_{16}\text{H}_{21}\text{O}_4$   $[\text{M}+\text{H}]^+$ : 277.1434, found: 277.1437.

## 2.10 Synthesis of Ester S1

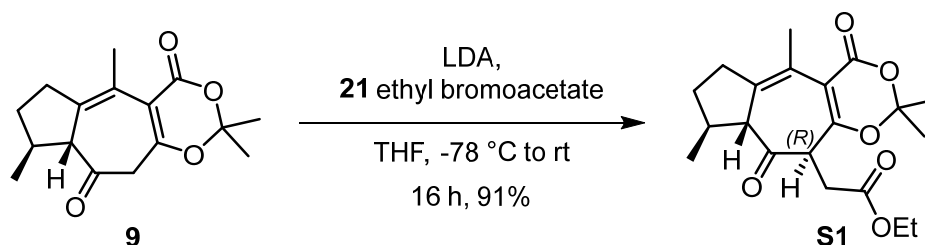

To a stirred solution of diisopropylamine (2.24 mL, 15.95 mmol) in anhydrous THF (100 mL) was added *n*-BuLi (6.33 mL, 2.5 M, 15.81 mmol) dropwise through a syringe at  $-78\text{ }^\circ\text{C}$  under nitrogen. After addition, the reaction flask was removed from the cold trap and warmed up to  $0\text{ }^\circ\text{C}$ . After being stirred at  $0\text{ }^\circ\text{C}$  for 30 minutes, the reaction flask was moved to the cold trap and cooled down to  $-78\text{ }^\circ\text{C}$ . Then ketone **9** (3.80 g, 13.75 mmol) was introduced to the flask in one portion, and the reaction mixture was then stirred for 1 hour. Ethyl bromoacetate **21** (2.48 g, 14.85 mmol) was cannulated to the solution of ketone at  $-78\text{ }^\circ\text{C}$ . The reaction mixture was allowed to stir at room temperature for about 16 hours. After TLC analysis, saturated aqueous solution of  $\text{NH}_4\text{Cl}$  (200 mL) was added to the reaction mixture, and the resulting suspension was extracted with EA (3×300 mL). The combined organic phases were washed with brine (800 mL), dried over anhydrous  $\text{Na}_2\text{SO}_4$ , filtered, and concentrated under reduced pressure. The residue was purified by column chromatography on silica gel (petroleum ether/EtOAc = 20:1) to give ethyl ester **S1** (4.53 g, 91%) as a colorless oil.

$R_f$  = 0.63 (petroleum ether : ethyl acetate = 5:1).

$[\alpha]_D^{20} = -160.7$  ( $c$  0.42, MeOH).

$^1\text{H NMR}$  (600 MHz,  $\text{CDCl}_3$ )  $\delta$  4.13 (q,  $J = 6.6$  Hz, 2H), 3.83 (td,  $J = 6.6, 1.8$  Hz, 1H), 2.92 (dd,  $J = 17.4, 6.6$  Hz, 1H), 2.76 (dd,  $J = 17.4, 7.2$  Hz, 1H), 2.69 – 2.65 (m, 1H), 2.59 – 2.54 (m, 1H), 2.49 – 2.45 (m, 1H), 2.33 – 2.29 (m, 1H), 2.05 (s, 3H), 1.92 – 1.86 (m, 1H), 1.67 (s, 3H), 1.61 (s, 3H), 1.39 – 1.32 (m, 1H), 1.26 (t,  $J = 7.2$  Hz, 3H), 1.10 (d,  $J = 6.6$  Hz, 3H).

$^{13}\text{C NMR}$  (150 MHz,  $\text{CDCl}_3$ )  $\delta$  206.79, 171.88, 160.18, 158.85, 142.02, 123.22, 109.95, 106.17, 63.39, 61.00, 51.08, 36.77, 33.21, 30.58, 29.18, 25.31, 24.67, 19.91, 18.71, 14.34.

**HRMS** (ESI): Calcd for  $\text{C}_{20}\text{H}_{27}\text{O}_6$   $[\text{M}+\text{H}]^+$ : 363.1802, found: 363.1797.

## 2.11 Synthesis of Alcohol S2

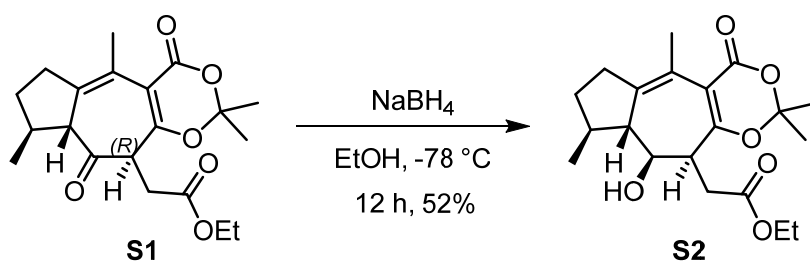

To a stirred solution of ester **S1** (4.5 g, 12.42 mmol) in  $\text{EtOH}$  (124 mL) was added  $\text{NaBH}_4$  (705 mg, 18.6 mmol) in one portion at  $-78^\circ\text{C}$ , and the resultant mixture was then stirred at this temperature for 12 hours. Upon completion, the reaction was carefully quenched with saturated aqueous solution of  $\text{NH}_4\text{Cl}$  (100 mL). The mixture was extracted with DCM ( $3 \times 200$  mL). The combined organic phases were washed with brine (600 mL), dried over anhydrous  $\text{Na}_2\text{SO}_4$ , filtered and concentrated under reduced pressure. The residue was purified by flash column chromatography on silica gel (petroleum ether/ $\text{EtOAc}$  = 10:1 to 2:1) to afford alcohol **S2** (2.08 g, 52%) as a colorless oil.

$R_f = 0.26$  (petroleum ether : ethyl acetate = 2:1).

$[\alpha]_D^{20} = -44.2$  ( $c$  0.24, MeOH).

**<sup>1</sup>H NMR** (400 MHz, CDCl<sub>3</sub>) δ 4.14 (qd, *J* = 7.2, 1.2 Hz, 2H), 4.06 – 4.03 (m, 1H), 3.11 – 3.06 (m, 1H), 2.77 (dd, *J* = 16.4, 8.8 Hz, 1H), 2.53 – 2.42 (m, 2H), 2.38 – 2.30 (m, 1H), 2.10 – 2.06 (m, 2H), 1.99 – 1.94 (m, 3H), 1.92 – 1.85 (m, 2H), 1.72 (s, 3H), 1.65 (s, 3H), 1.49 – 1.42 (m, 1H), 1.27 (t, *J* = 7.2 Hz, 3H), 0.99 (d, *J* = 7.2 Hz, 3H).

**<sup>13</sup>C NMR** (100 MHz, CDCl<sub>3</sub>) δ 172.53, 167.50, 160.23, 144.44, 123.21, 109.12, 106.08, 88.32, 60.86, 58.55, 42.88, 39.13, 33.02, 30.86, 28.71, 25.80, 24.51, 20.72, 18.21, 14.33.

**HRMS** (ESI): Calcd for C<sub>20</sub>H<sub>29</sub>O<sub>6</sub> [M+H]<sup>+</sup>: 365.1959, found: 365.1956.

## 2.12 Synthesis of Lactone 22

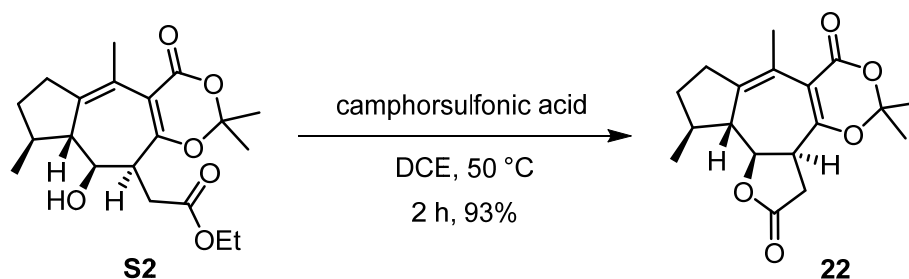

To a stirred solution of alcohol **S2** (2.00 g, 6.31 mmol) in DCE (130 mL) was added camphorsulfonic acid (293.0 mg, 1.26 mmol) in one portion. The mixture was stirred for 2 hours at 50 °C. Upon completion, the reaction was quenched with saturated aqueous solution of NaHCO<sub>3</sub> (150 mL). The mixture was extracted with DCM (3×100 mL). The combined organic phases were washed with brine (300 mL), dried over anhydrous Na<sub>2</sub>SO<sub>4</sub>, filtered and concentrated under reduced pressure. The residue was purified by flash column chromatography on silica gel (petroleum ether/EtOAc = 5:1) to afford lactone **22** (1.87 g, 93%) as a white solid.

**M.p.** = 121.3 – 123.6 °C.

**R<sub>f</sub>** = 0.45 (petroleum ether : ethyl acetate = 5:1).

**[α]<sub>D</sub><sup>20</sup>** = –185.1 (*c* 0.12, MeOH).

**<sup>1</sup>H NMR** (400 MHz, CDCl<sub>3</sub>) δ 4.57 (dd, *J* = 10.8, 6.8 Hz, 1H), 3.35 – 3.31 (m, 1H), 2.99 (dd, *J* = 17.6, 1.6 Hz, 1H), 2.54 (dd, *J* = 17.6, 9.2 Hz, 1H), 2.49 – 2.40 (m, 1H), 2.37 – 2.29 (m, 1H), 2.21 – 2.16 (m, 2H), 1.97 – 1.88 (m, 4H), 1.69 (d, *J* = 5.6 Hz, 6H), 1.52 – 1.45 (m, 1H), 0.95 (d, *J* = 6.8 Hz, 3H).

$^{13}\text{C}$  NMR (100 MHz,  $\text{CDCl}_3$ )  $\delta$  175.10, 163.75, 159.60, 142.90, 123.30, 109.63, 106.33, 92.89, 53.40, 40.63, 37.97, 32.48, 29.34, 28.57, 25.47, 24.74, 20.05, 18.26.

HRMS (ESI): Calcd for  $\text{C}_{18}\text{H}_{23}\text{O}_5$   $[\text{M}+\text{H}]^+$ : 319.1540, found: 319.1540.

### 2.13 Synthesis of Alcohol **23**

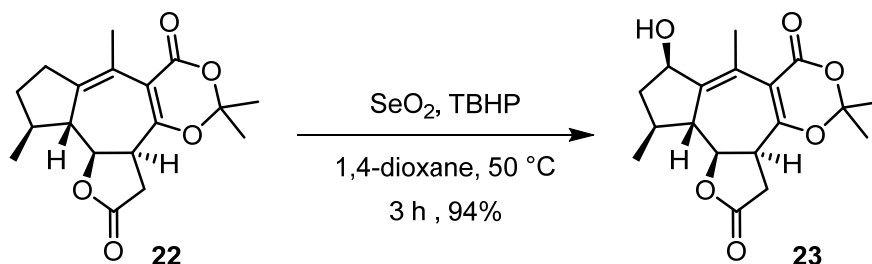

To a stirred solution of lactone **22** (1.87 g, 5.87 mmol) in 1,4-dioxane (60 mL) was added  $\text{SeO}_2$  (717 mg, 6.46 mmol) and TBHP (2.35 mL, 5.5 M in pentane, 12.92 mmol) at room temperature. The reaction mixture was stirred at 50 °C for 3 hours before being quenched with saturated aqueous solution of  $\text{Na}_2\text{S}_2\text{O}_3$  (100 mL). The aqueous layer was extracted with EtOAc (3×200 mL). The combined organic phases were washed with brine (600 mL) and dried over anhydrous  $\text{Na}_2\text{SO}_4$ , filtered and concentrated under reduced pressure. The residue was purified by flash column chromatography on silica gel (petroleum ether/EtOAc = 5:1 to 3:1) to afford alcohol **23** (1.84 g, 94%) as a white solid.

**M.p.** = 154.6 – 158.1 °C.

**R<sub>f</sub>** = 0.15 (petroleum ether : ethyl acetate = 3:1).

$[\alpha]_{\text{D}}^{20}$  = –198.4 (*c* 0.23, MeOH).

$^1\text{H}$  NMR (400 MHz,  $\text{CDCl}_3$ )  $\delta$  4.84 (s, 1H), 4.54 (dd,  $J$  = 11.2, 7.2 Hz, 1H), 3.37 – 3.32 (m, 1H), 3.05 (dd,  $J$  = 17.6, 1.2 Hz, 1H), 2.57 (dd,  $J$  = 18, 9.2 Hz, 1H), 2.42 (d,  $J$  = 11.2 Hz, 1H), 2.30 – 2.22 (m, 2H), 2.17 (d,  $J$  = 0.8 Hz, 3H), 1.74 (d,  $J$  = 7.6 Hz, 6H), 1.69 – 1.66 (m, 2H), 1.19 (d,  $J$  = 7.2 Hz, 3H).

$^{13}\text{C}$  NMR (100 MHz,  $\text{CDCl}_3$ )  $\delta$  174.72, 164.48, 159.21, 144.90, 130.05, 109.76, 106.82, 92.43, 72.42, 53.88, 41.84, 40.64, 36.19, 29.35, 25.85, 24.64, 22.44, 18.57.

HRMS (ESI): Calcd for  $\text{C}_{18}\text{H}_{26}\text{NO}_6$   $[\text{M}+\text{NH}_4]^+$ : 352.1755, found: 352.1749.

## 2.14 Synthesis of Ketone S3

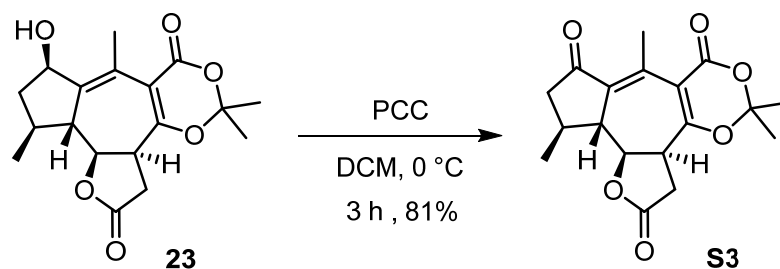

To the mixture of alcohol **23** (1.84 g, 5.5 mmol) and  $\text{Al}_2\text{O}_3$  (9.48 g, basic) in anhydrous DCM (110 mL) was added PCC (2.37 g, 11 mmol) in one portion at 0 °C. After stirring 3 hours, the reaction was diluted with DCM (100 mL), the suspension was filtered and the residue was washed with DCM (3×100 mL). The combined filtrate was washed sequentially with saturated aqueous solution of  $\text{Na}_2\text{S}_2\text{O}_3$  (300 mL), HCl (300 mL, 1 M) and brine (500 mL). The organic phases were dried over anhydrous  $\text{Na}_2\text{SO}_4$ , filtered, and concentrated under reduced pressure. The residue was purified by column chromatography on silica gel (petroleum ether/EtOAc = 5:1) to give ketone **S3** (1.48 g, 81%) as a yellow solid.

**M.p.** = 183.1 – 184.2 °C.

**R<sub>f</sub>** = 0.33 (petroleum ether : ethyl acetate = 5:1).

**[α]<sub>D</sub><sup>20</sup>** = −407.4 (*c* 0.23, MeOH).

**<sup>1</sup>H NMR** (400 MHz,  $\text{CDCl}_3$ ) δ 4.77 (dd, *J* = 11.6, 6.8 Hz, 1H), 3.41 – 3.37 (m, 1H), 3.07 (d, *J* = 17.6 Hz, 1H), 2.75 (dd, *J* = 18.4, 8.4 Hz, 1H), 2.62 (dd, *J* = 18.0, 9.2 Hz, 1H), 2.50 – 2.42 (m, 5H), 2.16 (d, *J* = 18.4 Hz, 1H), 1.75 (d, *J* = 4.0 Hz, 6H), 1.05 (d, *J* = 7.2 Hz, 3H).

**<sup>13</sup>C NMR** (100 MHz,  $\text{CDCl}_3$ ) δ 205.09, 174.09, 166.72, 158.17, 145.79, 131.99, 109.92, 107.40, 91.83, 52.74, 46.94, 41.07, 29.67, 29.22, 25.74, 24.72, 22.49, 17.81.

**HRMS** (ESI): Calcd for  $\text{C}_{18}\text{H}_{20}\text{NaO}_6^+$  [ $\text{M}+\text{Na}$ ]<sup>+</sup>: 355.1152, found: 355.1157.

## 2.15 Synthesis of Ketone 24

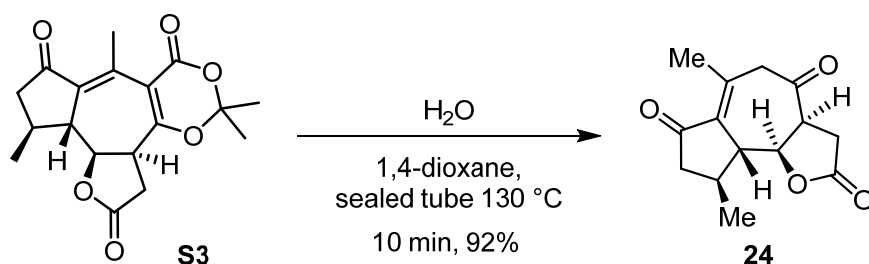

Ketone **S3** (1.48 g, 4.45 mmol) was dissolved in 1,4-dioxane (148 mL) at room temperature in a sealed tube and then H<sub>2</sub>O (1.2 mL, 66.8 mmol) was added. The reaction mixture was stirred at 130 °C for 10 minutes. Upon completion, the reaction was cooled by ice-bath and poured to a saturated aqueous solution of NaHCO<sub>3</sub> (200 mL). The aqueous layer was extracted with EtOAc (3×300 mL). The combined organic phases were washed with brine (900 mL) and dried over anhydrous Na<sub>2</sub>SO<sub>4</sub>, filtered and concentrated under reduced pressure. The residue was purified by flash column chromatography on silica gel (petroleum ether/EtOAc = 5:1 to 2:1) to afford ketone **24** (1.02 g, 92%) as a white solid.

**M.p.** = 146.4 – 151.1 °C.

**R<sub>f</sub>** = 0.34 (petroleum ether : ethyl acetate = 3:1).

**[α]<sub>D</sub><sup>20</sup>** = –202.4 (*c* 0.08, MeOH).

**<sup>1</sup>H NMR** (600 MHz, CDCl<sub>3</sub>) δ 4.74 (dd, *J* = 12.0, 8.4 Hz, 1H), 3.65 – 3.61 (m, 2H), 3.17 – 3.09 (m, 2H), 2.68 (dd, *J* = 18.0, 8.4 Hz, 1H), 2.63 (d, *J* = 12.0 Hz, 1H), 2.56 (dd, *J* = 18.0, 9.0 Hz, 1H), 2.47 – 2.45 (m, 1H), 2.32 (s, 3H), 2.11 (dd, *J* = 18.6, 3.0 Hz, 1H), 1.06 (d, *J* = 7.2 Hz, 3H).

**<sup>13</sup>C NMR** (150 MHz, CDCl<sub>3</sub>) δ 205.31, 203.77, 174.75, 147.58, 130.59, 83.40, 53.59, 50.88, 48.33, 46.00, 30.04, 29.33, 22.09, 20.30.

**HRMS** (ESI): Calcd for C<sub>14</sub>H<sub>17</sub>O<sub>4</sub> [M+H]<sup>+</sup>: 249.1121, found: 249.1118.

## 2.16 Synthesis of Alcohol 25

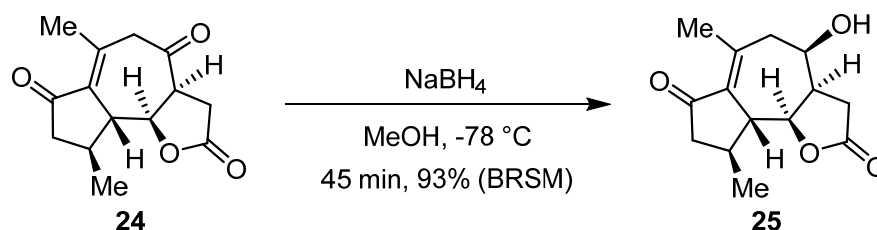

To a stirred solution of ketone **24** (1.02 g, 4.11 mmol) in MeOH (82 mL) was added NaBH<sub>4</sub> (124.2 mg, 3.29 mmol) in one portion at -78 °C. The mixture was stirred for 45 minutes at -78 °C. Upon completion, the reaction was quenched with saturated aqueous solution of NH<sub>4</sub>Cl (100 mL). The mixture was extracted with DCM (3×200 mL). The combined organic phases were washed with brine (600 mL), dried over anhydrous Na<sub>2</sub>SO<sub>4</sub>, filtered and concentrated under reduced pressure. The residue was purified by flash column chromatography on silica gel (petroleum ether/EtOAc = 5:1 to 1:1) to afford alcohol **25** (451.1 mg, 44%, BRSM 93%) as a white solid as well as ketone **24** (480.2 mg, 47%).

**M.p.** = 113.7 – 116.1 °C.

**R<sub>f</sub>** = 0.23 (petroleum ether : ethyl acetate = 1:1).

**[α]<sub>D</sub><sup>20</sup>** = +39.3 (*c* 0.09, MeOH).

**<sup>1</sup>H NMR** (600 MHz, CDCl<sub>3</sub>) δ 4.47 (dd, *J* = 11.4, 7.8 Hz, 1H), 4.06 (br s, 1H), 3.15 (d, *J* = 8.4 Hz, 1H), 2.92– 2.79 (m, 3H), 2.65 – 2.56 (m, 2H), 2.50 (d, *J* = 17.4 Hz, 1H), 2.30 – 2.25 (m, 5H), 2.04 (dd, *J* = 18.0, 7.2 Hz, 1H), 1.16 (d, *J* = 7.2 Hz, 3H).

**<sup>13</sup>C NMR** (150 MHz, CDCl<sub>3</sub>) δ 206.48, 176.29, 150.28, 131.09, 83.65, 66.99, 49.28, 47.14, 44.36, 42.87, 31.27, 30.48, 22.23, 21.67.

**HRMS** (ESI): Calcd for C<sub>14</sub>H<sub>19</sub>O<sub>4</sub> [M+H]<sup>+</sup>: 251.1278, found: 251.1272.

## 2.17 Synthesis of Alcohol 26

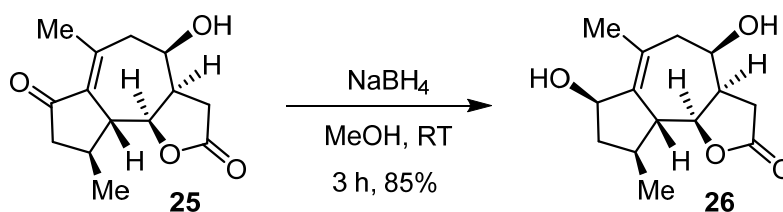

To a stirred solution of ketone **25** (6.8 mg, 0.027 mmol) in MeOH (0.6 mL) was added NaBH<sub>4</sub> (2.1 mg, 0.054 mmol) in one portion at 0 °C. The mixture was stirred for 3 hours at ambient temperature. Upon completion, the reaction was quenched with saturated aqueous solution of NH<sub>4</sub>Cl (5 mL). The mixture was extracted with DCM (3×5 mL). The combined organic phases were washed with brine (10 mL), dried over anhydrous Na<sub>2</sub>SO<sub>4</sub>, filtered and concentrated under reduced pressure. The residue was purified by flash column chromatography on silica gel (petroleum ether/EtOAc = 3:1 to 1:2) to afford alcohol **26** (5.8 mg, 85%) as a white solid.

**M.p.** = 145.6 – 148.5 °C.

**R<sub>f</sub>** = 0.22 (petroleum ether : ethyl acetate = 1:2).

**[α]<sub>D</sub><sup>20</sup>** = +27.3 (*c* 0.09, MeOH).

**<sup>1</sup>H NMR** (600 MHz, CDCl<sub>3</sub>) δ 4.71 (t, *J* = 6.0 Hz, 1H), 4.35 (dd, *J* = 10.8, 8.4 Hz, 1H), 4.01 (s, 1H), 2.90 (dd, *J* = 17.4, 11.4 Hz, 1H), 2.83 – 2.77 (m, 2H), 2.66 (dd, *J* = 17.4, 6.0 Hz, 1H), 2.55 (br s, 1H), 2.49 (dd, *J* = 17.4, 9.0 Hz, 1H), 2.37 (d, *J* = 17.4 Hz, 1H), 2.28 – 2.23 (m, 1H), 2.00 (br s, 1H), 1.95 – 1.90 (m, 1H), 1.85 (s, 3H), 1.37 – 1.32 (m, 1H), 1.19 (d, *J* = 6.6 Hz, 3H).

**<sup>13</sup>C NMR** (150 MHz, CDCl<sub>3</sub>) δ 176.73, 139.53, 130.92, 84.90, 73.49, 66.46, 50.17, 43.83, 43.60, 41.20, 36.94, 29.67, 22.16, 21.80.

**HRMS** (ESI): Calcd for C<sub>14</sub>H<sub>21</sub>O<sub>4</sub> [M+H]<sup>+</sup>: 253.1434, found: 253.1437.

## 2.18 Synthesis of Diene 28

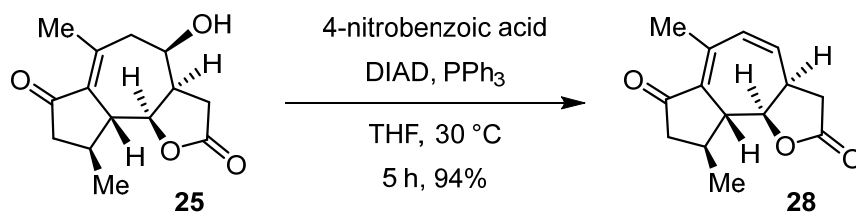

To a stirred solution of alcohol **25** (6.0 mg, 0.024 mmol) in anhydrous THF (0.16 mL) was sequentially added PPh<sub>3</sub> (18.9 mg, 0.072 mmol), 4-nitrobenzoic acid (12.0 mg, 0.072 mmol) and DIAD (13 μL, 0.072 mmol) at ambient temperature, and the mixture was stirred for 5 hours under nitrogen atmosphere. Upon completion, the reaction was

quenched with saturated aqueous solution of NaHCO<sub>3</sub> (5 mL). The mixture was extracted with EtOAc (3×5 mL). The combined organic phases were washed with brine (10 mL), dried over anhydrous Na<sub>2</sub>SO<sub>4</sub>, filtered and concentrated under reduced pressure. The residue was purified by column chromatography on silica gel (petroleum ether/EtOAc = 20:1 to 10:1) to give diene **28** (5.2 mg, 94%) as a white solid.

**M.p.** = 131.4 – 133.4 °C.

**R<sub>f</sub>** = 0.62 (petroleum ether : ethyl acetate = 5:1).

**[α]<sub>D</sub><sup>20</sup>** = –318.1 (*c* 0.19, MeOH).

**<sup>1</sup>H NMR** (600 MHz, CD<sub>3</sub>OD) δ 6.20 (dd, *J* = 11.4, 1.8 Hz, 1H), 6.09 (dd, *J* = 11.4, 3.0 Hz, 1H), 4.79 (dd, *J* = 10.8, 7.2 Hz, 1H), 3.28 – 3.23 (m, 1H), 2.94 (dd, *J* = 17.4, 9.6 Hz, 1H), 2.79 (dd, *J* = 18.0, 8.4 Hz, 1H), 2.62 (dd, *J* = 17.4, 6.0 Hz, 1H), 2.50 (d, *J* = 12.0 Hz, 1H), 2.48 – 2.44 (m, 1H), 2.25 (d, *J* = 1.8 Hz, 3H), 2.09 (dd, *J* = 18.0, 4.2 Hz, 1H), 1.10 (d, *J* = 6.6 Hz, 3H).

**<sup>13</sup>C NMR** (150 MHz, CD<sub>3</sub>OD) δ 208.42, 177.78, 149.00, 138.74, 135.31, 132.27, 92.79, 54.10, 47.95, 39.73, 36.24, 30.97, 22.74, 18.68.

**HRMS** (ESI): Calcd for C<sub>14</sub>H<sub>17</sub>O<sub>3</sub> [M+H]<sup>+</sup>: 233.1172, found: 233.1177.

## 2.19 Synthesis of Ester S4

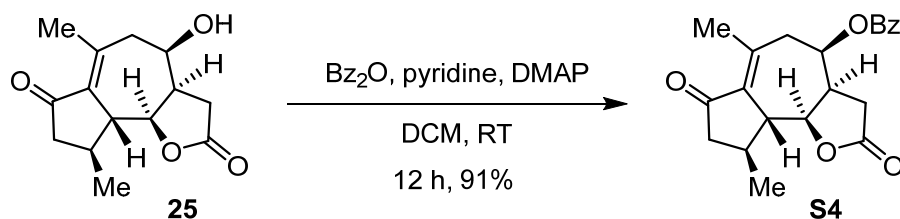

To a stirred solution of ketone **25** (988.0 mg, 3.95 mmol) in DCM (79 mL) was added Bz<sub>2</sub>O (1.79 g, 7.89 mmol), pyridine (1.27 mL, 15.79 mmol) and DMAP (144.7 mg, 1.18 mmol) at 0 °C. The mixture was stirred for 12 hours at ambient temperature. Upon completion, the reaction was quenched with saturated aqueous solution of NaHCO<sub>3</sub> (80 mL). The mixture was extracted with DCM (3×80 mL). The combined organic phases were washed with brine (200 mL), dried over anhydrous Na<sub>2</sub>SO<sub>4</sub>, filtered and concentrated under reduced pressure. The residue was purified by flash

column chromatography on silica gel (petroleum ether/EtOAc = 20:1 to 10:1) to afford ester **S4** (1.28 g, 91%) as a white solid.

**M.p.** = 133.2 – 136.8 °C.

**R<sub>f</sub>** = 0.27 (petroleum ether : ethyl acetate = 10:1).

**[α]<sub>D</sub><sup>20</sup>** = –71.5 (*c* 0.31, CHCl<sub>3</sub>).

**<sup>1</sup>H NMR** (400 MHz, CD<sub>3</sub>OD) δ 8.02 – 7.99 (m, 2H), 7.65 – 7.61 (m, 1H), 7.52 – 7.48 (m, 2H), 5.32 (q, *J* = 4.4 Hz, 1H), 4.73 (dd, *J* = 11.2, 7.2 Hz, 1H), 3.28 (br s, 1H), 3.18 – 3.07 (m, 2H), 2.85 (dd, *J* = 17.6, 9.2 Hz, 1H), 2.77 – 2.66 (m, 3H), 2.42 – 2.36 (m, 1H), 2.26 (d, *J* = 1.6 Hz, 3H), 2.05 (dd, *J* = 17.6, 5.2 Hz, 1H), 1.16 (d, *J* = 7.2 Hz, 3H).

**<sup>13</sup>C NMR** (100 MHz, CD<sub>3</sub>OD) δ 207.99, 178.28, 166.98, 152.73, 134.67, 131.40, 130.96, 130.56, 129.79, 84.32, 72.11, 50.73, 47.41, 41.84, 41.82, 32.57, 32.04, 22.44, 21.17.

**HRMS** (ESI): Calcd for C<sub>21</sub>H<sub>22</sub>NaO<sub>5</sub> [M+Na]<sup>+</sup>: 377.1359, found: 377.1356.

## 2.20 Synthesis of Alcohol 30

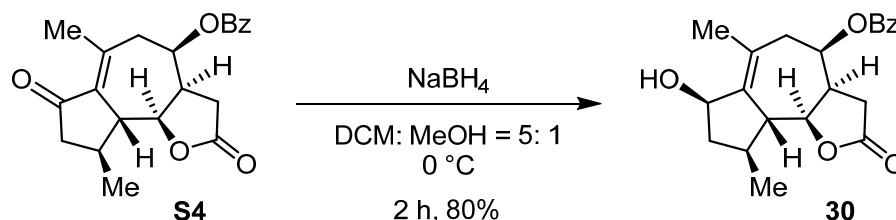

To a stirred solution of ester **S4** (1.20 g, 3.39 mmol) in a mixture solvent (68 mL, DCM: MeOH = 5:1, v/v) was added NaBH<sub>4</sub> (192 mg, 5.08 mmol) in one portion at 0 °C, and the mixture was stirred for 2 hours. Upon completion, the reaction was quenched with saturated aqueous solution of NaHCO<sub>3</sub> (50 mL). The mixture was extracted with DCM (3×100 mL). The combined organic phases were washed with brine (300 mL), dried over anhydrous Na<sub>2</sub>SO<sub>4</sub>, filtered and concentrated under reduced pressure. The residue was purified by flash column chromatography on silica gel (petroleum ether/EtOAc = 20:1 to 10:1) to afford alcohol **30** (966.1 mg, 80%) as a white solid.

**M.p.** = 145.5 – 152.4 °C.

**R<sub>f</sub>** = 0.25 (petroleum ether : ethyl acetate = 10:1).

$[\alpha]_D^{20} = -23.5$  ( $c$  0.11,  $\text{CHCl}_3$ ).

$^1\text{H NMR}$  (600 MHz,  $\text{CD}_3\text{OD}$ )  $\delta$  8.01 (d,  $J = 7.8$  Hz, 2H), 7.62 (t,  $J = 7.2$  Hz, 1H), 7.50 (t,  $J = 7.8$  Hz, 2H), 5.31 (q,  $J = 4.2$  Hz, 1H), 4.72 (s, 1H), 4.51 (dd,  $J = 10.8, 7.2$  Hz, 1H), 3.14 – 3.07 (m, 2H), 2.90 (dd,  $J = 17.4, 6.0$  Hz, 1H), 2.76 (dd,  $J = 18.0, 9.0$  Hz, 1H), 2.66 (dd,  $J = 17.4, 7.8$  Hz, 1H), 2.46 (dd,  $J = 17.4, 2.4$  Hz, 1H), 2.21 – 2.14 (m, 2H), 1.88 (s, 3H), 1.49 (dt,  $J = 12.6, 5.4$  Hz, 1H), 1.24 (d,  $J = 6.6$  Hz, 3H).

$^{13}\text{C NMR}$  (150 MHz,  $\text{CD}_3\text{OD}$ )  $\delta$  178.58, 167.20, 139.37, 134.53, 132.92, 131.20, 130.57, 129.73, 85.82, 74.26, 72.69, 51.92, 43.16, 42.20, 39.50, 38.08, 32.36, 22.60, 21.67.

**HRMS** (ESI): Calcd for  $\text{C}_{21}\text{H}_{24}\text{NaO}_5$   $[\text{M}+\text{Na}]^+$ : 379.1516, found: 379.1515.

## 2.21 Hydrolysis of Alcohol **30**

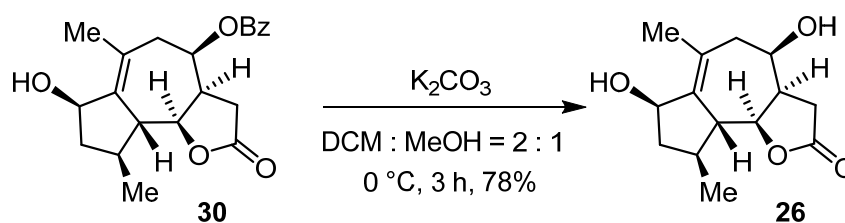

To a stirred solution of alcohol **30** (7.8 mg, 0.022 mmol) in a mixture solvent (400  $\mu\text{L}$ , DCM: MeOH = 2:1, v/v) was added  $\text{K}_2\text{CO}_3$  (30.3 mg, 0.22 mmol) in one portion at 0 °C, and the mixture was stirred for 3 hours. Upon completion, the reaction was quenched with saturated aqueous solution of  $\text{NH}_4\text{Cl}$  (2 mL). The mixture was extracted with EtOAc (3 $\times$ 5 mL). The combined organic phases were washed with brine (10 mL), dried over anhydrous  $\text{Na}_2\text{SO}_4$ , filtered and concentrated under reduced pressure. The residue was purified by flash column chromatography on silica gel (petroleum ether/EtOAc = 1:1 to 1:5) to afford alcohol **26** (4.3 mg, 78%) as a white solid. The NMR spectra of this compound agree well with the intermediate **26** which was obtained from the reduction of enone **25**.

## 2.22 Synthesis of Ketone 31

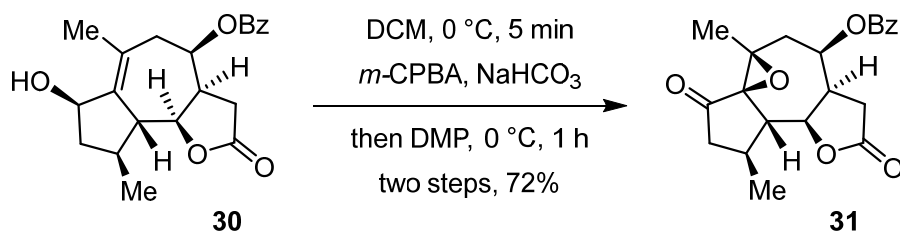

To a stirred solution of alcohol **30** (960.0 mg, 2.69 mmol) in DCM (54 mL) was added  $\text{NaHCO}_3$  (905.1 mg, 10.8 mmol) and *m*-CPBA (1.09 g, 85%, 5.39 mmol) sequentially at 0 °C. The resultant mixture was then stirred at 0 °C for 5 minutes. Upon completion, the reaction was quenched with saturated aqueous solution of  $\text{NaHCO}_3$  (50 mL). The mixture was extracted with DCM (3×50 mL). The combined organic phases were washed with brine (150 mL), dried over anhydrous  $\text{Na}_2\text{SO}_4$ , filtered and concentrated under reduced pressure. The crude product was used for next step without further purification.

To a stirred solution of above crude product in DCM (43 mL) was added DMP (1.82 g, 4.3 mmol) at 0 °C, and the mixture was stirred for 1 hour. Upon completion, the reaction was quenched with saturated aqueous solution of  $\text{Na}_2\text{S}_2\text{O}_3$  (50 mL). The mixture was extracted with DCM (3×50 mL). The combined organic phases were washed with brine (150 mL), dried over anhydrous  $\text{Na}_2\text{SO}_4$ , filtered and concentrated under reduced pressure. The residue was purified by flash column chromatography on silica gel (petroleum ether/EtOAc = 10:1 to 5:1) to afford ketone **31** (723.1 mg, 72%) as a white solid.

**M.p.** = 183.8 – 190.5 °C.

**R<sub>f</sub>** = 0.21 (petroleum ether : ethyl acetate = 10:1).

**[α]<sub>D</sub><sup>20</sup>** = –95.2 (*c* 0.17,  $\text{CHCl}_3$ ).

**<sup>1</sup>H NMR** (400 MHz,  $\text{CDCl}_3$ ) δ 7.98 (d, *J* = 7.2 Hz, 2H), 7.60 (t, *J* = 7.6 Hz, 1H), 7.46 (t, *J* = 15.2 Hz, 2H), 5.42 – 5.37 (m, 1H), 4.74 (dd, *J* = 11.6, 7.2 Hz, 1H), 3.42 – 3.34 (m, 1H), 2.81 – 2.59 (m, 4H), 2.36 – 2.23 (m, 4H), 1.69 (s, 3H), 1.16 (d, *J* = 7.2 Hz, 3H).

$^{13}\text{C}$  NMR (100 MHz,  $\text{CDCl}_3$ )  $\delta$  212.44, 174.38, 165.53, 133.82, 129.78, 129.35, 128.79, 78.36, 67.60, 64.29, 63.71, 49.09, 44.32, 42.46, 38.74, 29.56, 28.54, 21.35, 17.19.

HRMS (ESI): Calcd for  $\text{C}_{21}\text{H}_{22}\text{NaO}_6$   $[\text{M}+\text{Na}]^+$ : 393.1309, found: 393.1311.

## 2.23 Synthesis of Alcohol **29**

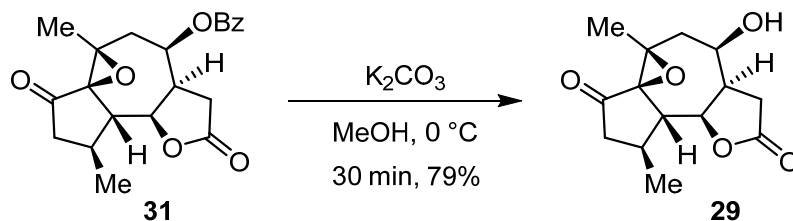

To a stirred solution of ketone **31** (720.2 mg, 1.94 mmol) in MeOH (38 mL) was added  $\text{K}_2\text{CO}_3$  (537.1 mg, 3.89 mmol) in one portion at 0  $^\circ\text{C}$ , and the mixture was stirred for 30 minutes. Upon completion, the suspension was filtered and the residue was washed with EtOAc (3 $\times$ 30 mL). The combined filtrate was washed with saturated aqueous solution of  $\text{NH}_4\text{Cl}$  (100 mL), brine (100 mL), the organic phases were dried over anhydrous  $\text{Na}_2\text{SO}_4$ . After removal of the solvents under reduced pressure, the residue was purified by column chromatography on silica gel (petroleum ether/EtOAc = 5:1 to 1:1) to give alcohol **29** (409 mg, 79%) as a pale-yellow oil.

$R_f$  = 0.15 (petroleum ether : ethyl acetate = 2:1).

$[\alpha]_D^{20} = -83.1$  ( $c$  0.18,  $\text{CHCl}_3$ ).

$^1\text{H}$  NMR (400 MHz,  $\text{CDCl}_3$ )  $\delta$  4.71 (dd,  $J$  = 12.0, 8.0 Hz, 1H), 3.99 (d,  $J$  = 4.0 Hz, 1H), 3.53 (d,  $J$  = 5.6 Hz, 1H), 3.03 – 2.96 (m, 1H), 2.91 – 2.83 (m, 1H), 2.79 – 2.68 (m, 3H), 2.57 (d,  $J$  = 12.0 Hz, 1H), 2.46 (dd,  $J$  = 17.2, 8.0 Hz, 1H), 2.16 (d,  $J$  = 16.0 Hz, 2H), 1.46 (s, 3H), 1.08 (d,  $J$  = 6.4 Hz, 3H).

$^{13}\text{C}$  NMR (100 MHz,  $\text{CDCl}_3$ )  $\delta$  210.53, 175.66, 79.05, 68.00, 67.15, 65.34, 46.87, 44.33, 43.86, 38.04, 28.70, 28.28, 22.16, 19.20.

HRMS (ESI): Calcd for  $\text{C}_{14}\text{H}_{18}\text{NaO}_5$   $[\text{M}+\text{Na}]^+$ : 289.1046, found: 289.1050.

## 2.24 Synthesis of Ester S5

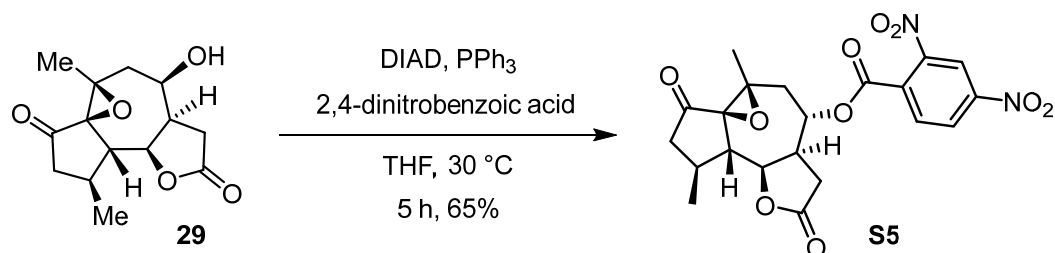

To a stirred solution of alcohol **29** (400.0 mg, 1.94 mmol) in anhydrous THF (15 mL) was sequentially added PPh<sub>3</sub> (1.18 g, 4.51 mmol), 2,4-dinitrobenzoic acid (956 mg, 4.51 mmol) and DIAD (885  $\mu$ L, 4.51 mmol) at 30  $^\circ$ C, and the mixture was stirred for 5 hours under nitrogen atmosphere. Upon completion, the reaction was quenched with saturated aqueous solution of NaHCO<sub>3</sub> (20 mL). The mixture was extracted with EtOAc (3 $\times$ 20 mL). The combined organic phases were washed with brine (50 mL), dried over anhydrous Na<sub>2</sub>SO<sub>4</sub>, filtered and concentrated under reduced pressure. The residue was purified by column chromatography on silica gel (petroleum ether/EtOAc = 10:1 to 5:1) to give ester **S5** (451.1 mg, 65%) as a colorless oil.

$R_f$  = 0.38 (petroleum ether : ethyl acetate = 5:1).

$[\alpha]_D^{20}$  =  $-70.9$  ( $c$  0.08, CHCl<sub>3</sub>).

**<sup>1</sup>H NMR** (400 MHz, CDCl<sub>3</sub>)  $\delta$  8.81 (d,  $J$  = 2.0 Hz, 1H), 8.57 (dd,  $J$  = 8.4, 2.4 Hz, 1H), 7.93 (d,  $J$  = 8.4 Hz, 1H), 5.18 – 5.13 (m, 1H), 4.72 (dd,  $J$  = 12.4, 8.4 Hz, 1H), 3.11 – 3.01 (m, 1H), 2.83 – 2.78 (m, 1H), 2.74 – 2.68 (m, 2H), 2.65 – 2.58 (m, 2H), 2.35 – 2.28 (m, 2H), 2.18 (d,  $J$  = 16.8 Hz, 1H), 1.47 (s, 3H), 1.14 (d,  $J$  = 7.2 Hz, 3H).

**<sup>13</sup>C NMR** (100 MHz, CDCl<sub>3</sub>)  $\delta$  210.44, 173.95, 162.80, 149.32, 147.94, 132.26, 131.57, 127.98, 119.87, 77.12, 72.20, 66.36, 64.33, 46.91, 44.35, 44.00, 39.68, 31.54, 28.25, 22.31, 18.62.

**HRMS** (ESI): Calcd for C<sub>21</sub>H<sub>20</sub>N<sub>2</sub>NaO<sub>10</sub> [M+Na]<sup>+</sup>: 483.1010, found: 483.1009.

## 2.25 Synthesis of Alcohol 33

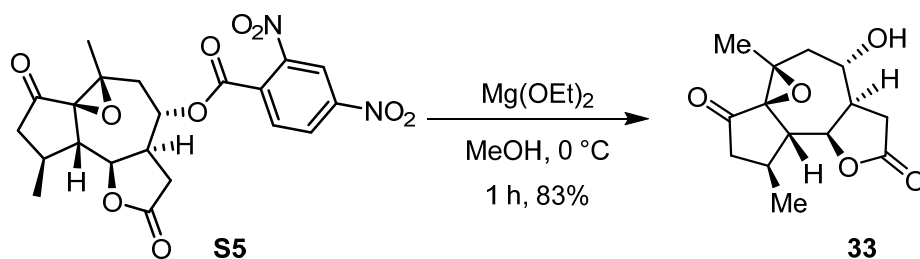

To a stirred solution of ester **S5** (450.0 mg, 0.98 mmol) in MeOH (15 mL) was added  $\text{Mg(OEt)}_2$  (559.2 mg, 4.89 mmol) at 0 °C, and the mixture was stirred for 1 hour. Upon completion, the suspension was filtered and the residue was washed with EtOAc (3×20 mL). The combined filtrate was washed with saturated aqueous solution of  $\text{NH}_4\text{Cl}$  (50 mL), brine (50 mL), the organic phases were dried over anhydrous  $\text{Na}_2\text{SO}_4$ . After removal of the solvents under reduced pressure, the residue was purified by column chromatography on silica gel (petroleum ether/EtOAc = 5:1 to 1:1) to give alcohol **33** (216.2 mg, 83%) as a pale-yellow oil.

$R_f$  = 0.13 (petroleum ether : ethyl acetate = 2:1).

$[\alpha]_D^{20} = -75.2$  ( $c$  0.15,  $\text{CHCl}_3$ ).

$^1\text{H NMR}$  (600 MHz,  $\text{CDCl}_3$ )  $\delta$  4.65 (dd,  $J$  = 12.0, 7.8 Hz, 1H), 3.69 (t,  $J$  = 9.6 Hz, 1H), 2.84 – 2.76 (m, 3H), 2.69 (dd,  $J$  = 16.8, 8.4 Hz, 1H), 2.51 – 2.47 (m, 1H), 2.43 (d,  $J$  = 15.6 Hz, 1H), 2.20 (dd,  $J$  = 15.6, 10.8 Hz, 1H), 2.16 – 2.13 (m, 2H), 1.99 (br s, 1H), 1.43 (s, 3H), 1.09 (d,  $J$  = 7.2 Hz, 3H).

$^{13}\text{C NMR}$  (150 MHz,  $\text{CDCl}_3$ )  $\delta$  211.14, 175.17, 77.58, 66.74, 66.62, 64.78, 47.16, 46.64, 44.23, 43.96, 32.31, 28.18, 22.21, 18.81.

HRMS (ESI): Calcd for  $\text{C}_{14}\text{H}_{18}\text{NaO}_5$   $[\text{M}+\text{Na}]^+$ : 289.1046, found: 289.1047.

## 2.26 Synthesis of Silyl Ether 34

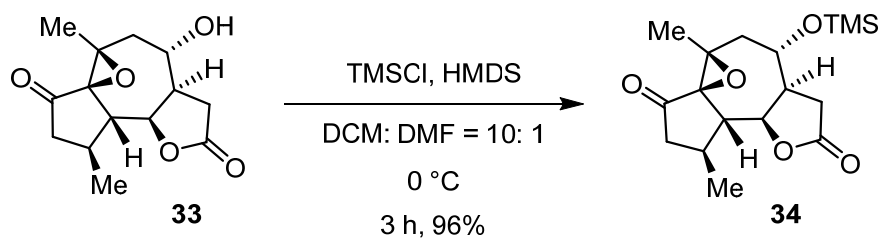

To a stirred solution of alcohol **33** (210.0 mg, 0.79 mmol) in a mixture solvent (15

mL, DCM: DMF = 10:1, v/v) were added TMSCl (150  $\mu$ L, 1.18 mmol) and HMDS (493  $\mu$ L, 2.37 mmol) at 0  $^{\circ}$ C, and the mixture was stirred for 3 hours. Upon completion, the reaction was quenched with saturated aqueous solution of NaHCO<sub>3</sub> (20 mL). The mixture was extracted with DCM (3 $\times$ 20 mL). The combined organic phases were washed with brine (50 mL), dried over anhydrous Na<sub>2</sub>SO<sub>4</sub>, filtered and concentrated under reduced pressure. The residue was purified by column chromatography on silica gel (petroleum ether/EtOAc = 20:1 to 10:1) to give silyl ether **34** (257 mg, 96%) as a white solid.

**M.p.** = 158.5 – 161.1  $^{\circ}$ C.

**R<sub>f</sub>** = 0.44 (petroleum ether : ethyl acetate = 10: 1).

**[ $\alpha$ ]<sub>D</sub><sup>20</sup>** = –73.6 (*c* 0.07, CHCl<sub>3</sub>).

**<sup>1</sup>H NMR** (400 MHz, CD<sub>3</sub>OD)  $\delta$  4.89 – 4.83 (m, 1H), 3.71 (td, *J* = 10.0, 2.8 Hz, 1H), 2.88 – 2.79 (m, 2H), 2.73 – 2.65 (m, 1H), 2.59 (dd, *J* = 10.0, 0.8 Hz, 2H), 2.38 – 2.20 (m, 3H), 2.06 – 2.01 (m, 1H), 1.36 (s, 3H), 1.06 (d, *J* = 7.2 Hz, 3H), 0.14 (s, 9H).

**<sup>13</sup>C NMR** (100 MHz, CD<sub>3</sub>OD)  $\delta$  213.42, 177.89, 79.25, 68.50, 68.25, 66.21, 48.40, 47.68, 44.98, 44.67, 33.38, 29.38, 22.08, 18.86, 0.18.

**HRMS** (ESI): Calcd for C<sub>17</sub>H<sub>26</sub>NaO<sub>5</sub>Si [*M*+Na]<sup>+</sup>: 361.1442, found: 361.1442.

## 2.27 Synthesis of Unsaturated Ketone **35**

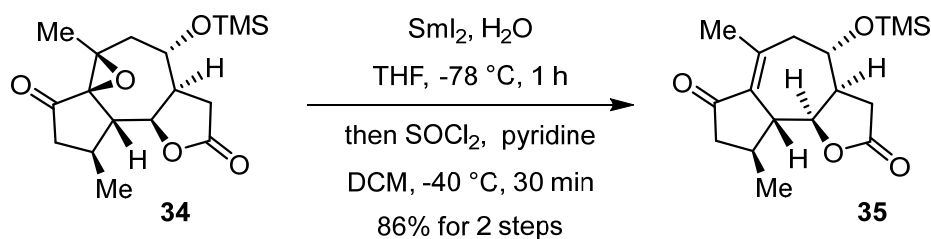

To a stirred solution of silyl ether **34** (250.0 mg, 0.74 mmol) and H<sub>2</sub>O (1.33 mL, 74 mmol) in THF (25 mL) was added SmI<sub>2</sub> (0.1 M in THF, 37 mL, 3.69 mmol) dropwise under nitrogen at  $-78\text{ }^{\circ}\text{C}$ . The resultant mixture was stirred at  $-78\text{ }^{\circ}\text{C}$  for 1 hour. Upon completion, the reaction was quenched with saturated aqueous solution of NaHCO<sub>3</sub> (50 mL). The mixture was extracted with EtOAc (3 $\times$ 80 mL). The combined organic phases were washed with brine (250 mL), dried over anhydrous Na<sub>2</sub>SO<sub>4</sub>, filtered and

concentrated under reduced pressure. The crude product was used for next step without further purification.

To a stirred solution of above crude product in DCM (15 mL) were added pyridine (475  $\mu$ L, 5.9 mmol) and SOCl<sub>2</sub> (161  $\mu$ L, 2.21 mmol) at -40 °C, and the mixture was stirred for 30 minutes. Upon completion, the reaction was quenched with saturated aqueous solution of NaHCO<sub>3</sub> (20 mL). The mixture was extracted with DCM (3 $\times$ 20 mL). The combined organic phases were washed with brine (50 mL), dried over anhydrous Na<sub>2</sub>SO<sub>4</sub>, filtered and concentrated under reduced pressure. The residue was purified by flash column chromatography on silica gel (petroleum ether/EtOAc = 10:1 to 5:1) to afford unsaturated ketone **35** (204.1 mg, 86%) as a yellow solid.

**M.p.** = 111.4 – 114.0 °C.

**R<sub>f</sub>** = 0.41 (petroleum ether : ethyl acetate = 5:1).

**[ $\alpha$ ]<sub>D</sub><sup>20</sup>** = +106 (*c* 0.07, CHCl<sub>3</sub>).

**<sup>1</sup>H NMR** (600 MHz, CD<sub>3</sub>OD)  $\delta$  4.62 (dd, *J* = 11.4, 7.8 Hz, 1H), 4.18 (td, *J* = 10.2, 3.6 Hz, 1H), 2.97 – 2.94 (m, 1H), 2.79 – 2.73 (m, 1H), 2.72 – 2.62 (m, 3H), 2.60 – 2.52 (m, 2H), 2.19 – 2.15 (m, 4H), 2.01 (dd, *J* = 17.4, 9.0 Hz, 1H), 1.19 (d, *J* = 6.6 Hz, 3H), 0.15 (s, 9H).

**<sup>13</sup>C NMR** (150 MHz, CD<sub>3</sub>OD)  $\delta$  208.08, 178.36, 152.73, 131.62, 85.33, 69.57, 49.34, 48.81, 47.97, 46.88, 33.48, 33.39, 21.88, 21.83, 0.11.

**HRMS** (ESI): Calcd for C<sub>17</sub>H<sub>27</sub>O<sub>4</sub>Si [ $M+H$ ]<sup>+</sup>: 323.1673, found: 323.1675.

## 2.28 Synthesis of enone **36**

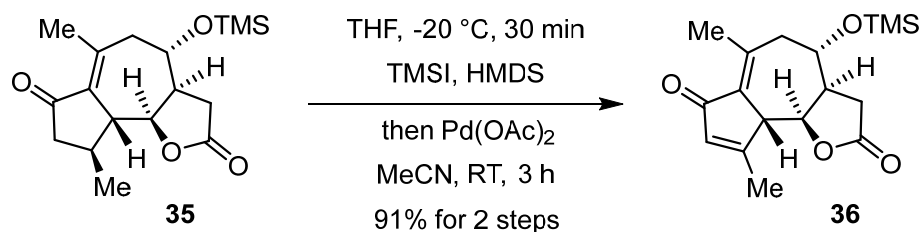

To a stirred solution of unsaturated ketone **35** (200.0 mg, 0.62 mmol) in anhydrous THF (13 mL) were sequentially added HMDS (647  $\mu$ L, 3.1 mmol) and TMSI (308  $\mu$ L, 2.17 mmol) at -20 °C. The resultant mixture was stirred at -20 °C for 30 minutes. Upon

completion, the reaction was quenched with saturated aqueous solution of NaHCO<sub>3</sub> (20 mL). The mixture was extracted with EtOAc (3×20 mL). The combined organic phases were washed with brine (50 mL), dried over anhydrous Na<sub>2</sub>SO<sub>4</sub>, filtered and concentrated under reduced pressure. The crude product was used for next step without further purification.

To a stirred solution of above crude product in MeCN (12 mL) was added Pd(OAc)<sub>2</sub> (208.0 mg, 0.93 mmol) at room temperature, and the mixture was stirred for 3 hours. Upon completion, the reaction was quenched with saturated aqueous solution of NaHCO<sub>3</sub> (20 mL). The mixture was extracted with EtOAc (3×20 mL). The combined organic phases were washed with brine (50 mL), dried over anhydrous Na<sub>2</sub>SO<sub>4</sub>, filtered and concentrated under reduced pressure. The residue was purified by flash column chromatography on silica gel (petroleum ether/EtOAc = 10:1 to 5:1) to afford enone **36** (181.2 mg, 91%) as a brown oil.

$R_f$  = 0.32 (petroleum ether : ethyl acetate = 5:1).

$[\alpha]_D^{20}$  = -56.9 (*c* 0.13, CHCl<sub>3</sub>).

<sup>1</sup>H NMR (600 MHz, CD<sub>3</sub>OD)  $\delta$  6.11 (s, 1H), 4.48 (dd, *J* = 10.8, 7.2 Hz, 1H), 4.35 (td, *J* = 9.6, 4.8 Hz, 1H), 3.81 (d, *J* = 10.8 Hz, 1H), 3.00 (dd, *J* = 19.2, 4.8 Hz, 1H), 2.77 – 2.69 (m, 2H), 2.67 – 2.62 (m, 1H), 2.41 (dd, *J* = 19.2, 9.6 Hz, 1H), 2.25 (d, *J* = 6.0 Hz, 6H), 0.17 (s, 9H).

<sup>13</sup>C NMR (150 MHz, CD<sub>3</sub>OD)  $\delta$  198.25, 178.29, 174.62, 149.48, 134.94, 129.29, 84.55, 67.09, 49.99, 49.49, 45.86, 32.42, 20.41, 19.15, 0.03.

HRMS (ESI): Calcd for C<sub>17</sub>H<sub>25</sub>O<sub>4</sub>Si [M+H]<sup>+</sup>: 321.1517, found: 321.1520.

## 2.29 Synthesis of $\alpha$ -methyl Lactone **37**

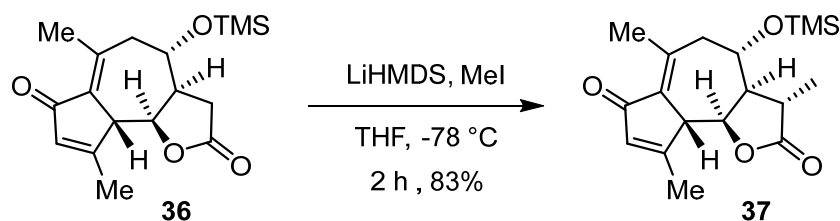

To a stirred solution of enone **36** (50.0 mg, 0.16 mmol) in anhydrous THF (3.2 mL)

was added LiHMDS (468  $\mu$ L, 1 M in THF, 0.47 mmol) dropwise under nitrogen at -78  $^{\circ}$ C. The resultant mixture was stirred at -78  $^{\circ}$ C for 1 hour, MeI (97  $\mu$ L, 1.56 mmol) was added via a syringe and the reaction mixture was stirred at -78  $^{\circ}$ C for 1 hour. Upon completion, the reaction was quenched with saturated aqueous solution of NaHCO<sub>3</sub> (30 mL). The mixture was extracted with EtOAc (3 $\times$ 30 mL). The combined organic phases were washed with brine (60 mL), dried over anhydrous Na<sub>2</sub>SO<sub>4</sub>, filtered and concentrated under reduced pressure. The residue was purified by flash column chromatography on silica gel (petroleum ether/EtOAc = 10:1 to 5:1) to afford  $\alpha$ -methyl lactone **37** (44.1 mg, 83%) as a white solid.

**M.p.** = 98.8 – 101.5  $^{\circ}$ C.

**R<sub>f</sub>** = 0.53 (petroleum ether : ethyl acetate = 5:1).

**[ $\alpha$ ]<sub>D</sub><sup>20</sup>** = -11.4 (*c* 0.07, CHCl<sub>3</sub>).

**<sup>1</sup>H NMR** (600 MHz, CD<sub>3</sub>OD)  $\delta$  6.13 (s, 1H), 4.44 (dd, *J* = 10.8, 7.8 Hz, 1H), 4.38 (td, *J* = 9.6, 3.6 Hz, 1H), 3.81 (d, *J* = 10.8 Hz, 1H), 2.89 (dd, *J* = 18.6, 3.6 Hz, 1H), 2.86 – 2.82 (m, 1H), 2.46 (dd, *J* = 18.0, 9.0 Hz, 1H), 2.40 (q, *J* = 7.8 Hz, 1H), 2.26 (d, *J* = 10.2 Hz, 6H), 1.32 (d, *J* = 7.2 Hz, 3H), 0.18 (s, 9H).

**<sup>13</sup>C NMR** (150 MHz, CD<sub>3</sub>OD)  $\delta$  198.15, 180.78, 174.85, 149.80, 135.52, 130.13, 82.29, 68.80, 54.14, 49.48, 47.31, 38.71, 20.99, 19.79, 16.26, 0.05.

**HRMS** (ESI): Calcd for C<sub>18</sub>H<sub>27</sub>O<sub>4</sub>Si [M+H]<sup>+</sup>: 335.1673, found: 335.1667.

### 2.30 Synthesis of Alcohol **38**

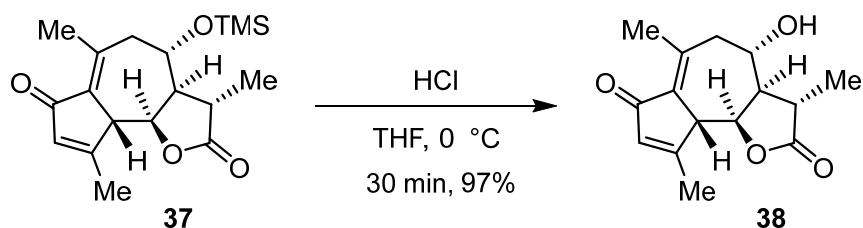

To a stirred solution of  $\alpha$ -methyl lactone **37** (40.0 mg, 0.12 mmol) in THF (2.4 mL) was added HCl (60  $\mu$ L, 4 M in dioxane, 0.24 mmol) at 0  $^{\circ}$ C, and the mixture was stirred for 30 minutes. Upon completion, the reaction was quenched with saturated aqueous solution of NaHCO<sub>3</sub> (5 mL). The mixture was extracted with EtOAc (3 $\times$ 10 mL). The

combined organic phases were washed with brine (30 mL), dried over anhydrous Na<sub>2</sub>SO<sub>4</sub>, filtered and concentrated under reduced pressure. The residue was purified by column chromatography on silica gel (petroleum ether/EtOAc = 3:1 to 1:2) to give alcohol **38** (30.2 mg, 97%) as a white solid.

**M.p.** = 155.8 – 159.0 °C.

**R<sub>f</sub>** = 0.17 (petroleum ether : ethyl acetate = 1:1).

**[α]<sub>D</sub><sup>20</sup>** = –48.1 (*c* 0.13, CHCl<sub>3</sub>).

**<sup>1</sup>H NMR** (600 MHz, CDCl<sub>3</sub>) δ 6.15 (s, 1H), 4.42 (t, *J* = 10.2 Hz, 1H), 4.30 (s, 1H), 3.49 (d, *J* = 10.8 Hz, 1H), 2.95 – 2.93 (m, 2H), 2.46 (dd, *J* = 18.6, 10.2 Hz, 1H), 2.35 – 2.32 (m, 1H), 2.30 (s, 3H), 2.24 (s, 3H), 1.82 (d, *J* = 5.4 Hz, 1H), 1.39 (d, *J* = 7.2 Hz, 3H).

**<sup>13</sup>C NMR** (150 MHz, CDCl<sub>3</sub>) δ 195.72, 178.64, 170.98, 146.31, 135.42, 128.81, 80.50, 66.87, 52.18, 48.49, 48.03, 37.67, 20.47, 19.80, 16.78.

**HRMS** (ESI): Calcd for C<sub>15</sub>H<sub>19</sub>O<sub>4</sub> [M+H]<sup>+</sup>: 263.1278, found: 263.1268.

### 2.31 Studies on the Epimerization of the C-11 Stereochemistry from **37**

**Table S2** Attempted conditions for epimerization of the C-11 stereochemistry from **37**

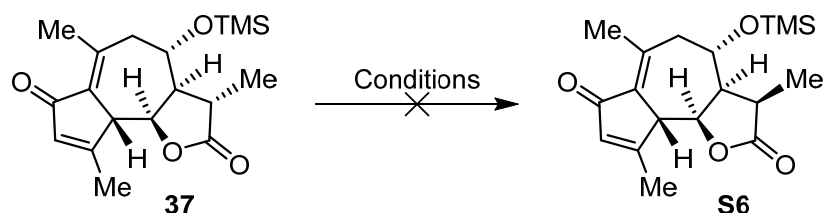

| Entry <sup>a</sup> | Base <sup>b</sup> | Additive          | Proton source <sup>c</sup> | Temperature    | Results               |
|--------------------|-------------------|-------------------|----------------------------|----------------|-----------------------|
| 1                  | KHMDS             | -                 | AcOH                       | -78 °C to 0 °C | Recovery of <b>37</b> |
| 2                  | NaHMDS            | -                 | AcOH                       | -78 °C to 0 °C | Recovery of <b>37</b> |
| 3                  | NaHMDS            | TBAF <sup>d</sup> | AcOH                       | -78 °C to 0 °C | Recovery of <b>37</b> |
| 4                  | NaHMDS            | -                 | Benzoic acid               | -78 °C to 0 °C | Recovery of <b>37</b> |
| 5                  | NaHMDS            | -                 | Phenol                     | -78 °C to 0 °C | Recovery of <b>37</b> |
| 6                  | LiHMDS            | -                 | BHT                        | -78 °C to 0 °C | Recovery of <b>37</b> |
| 7                  | LiHMDS            | -                 | TFA·Py                     | -78 °C to 0 °C | Recovery of <b>37</b> |
| 8                  | LiHMDS            | -                 | Benzoic acid               | -78 °C to 0 °C | Recovery of <b>37</b> |
| 9                  | LiHMDS            | -                 | AcOH                       | -78 °C to 0 °C | Recovery of <b>37</b> |
| 10                 | LDA               | -                 | AcOH                       | -78 °C to 0 °C | Recovery of <b>37</b> |
| 11                 | LiTMP             | -                 | BHT                        | -78 °C to 0 °C | Recovery of <b>37</b> |

|    |                                             |   |        |                |                       |
|----|---------------------------------------------|---|--------|----------------|-----------------------|
| 12 | LiNEt <sub>2</sub>                          | - | BHT    | -78 °C to 0 °C | Recovery of <b>37</b> |
| 13 | LiNEt <sub>2</sub>                          | - | Phenol | -78 °C to 0 °C | Recovery of <b>37</b> |
| 14 | DBU <sup>c</sup>                            | - | MeOH   | 0 °C to 80 °C  | Decomposed            |
| 15 | K <sub>2</sub> CO <sub>3</sub> <sup>e</sup> | - | Phenol | Reflux         | Decomposed            |

<sup>a</sup> Reactions conducted on a 5 mg scale under nitrogen atmosphere in 0.05 M THF. <sup>b</sup> Base (3 equiv).

<sup>c</sup> proton source (10 equiv). <sup>d</sup> additive (2 eq.). <sup>e</sup> solvent (toluene)

## 2.32 Studies on the Methylenation of C-11 Position from **36**

**Table S3** Attempted conditions for alkylation at C11 from **36**

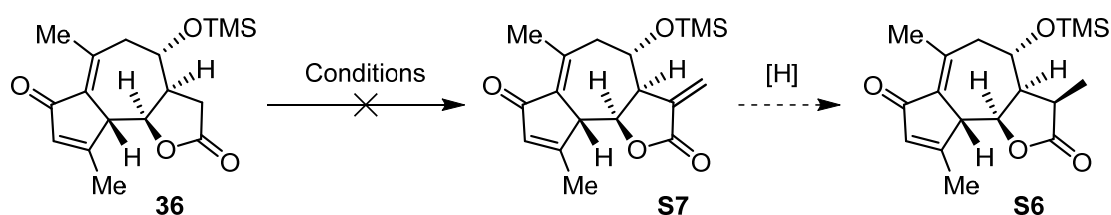

| Entry <sup>a</sup> | Conditions                                                           | Result                |
|--------------------|----------------------------------------------------------------------|-----------------------|
| 1                  | LiHMDS <sup>b</sup> , eschenmoser's salt (5 eq.)                     | Recovery of <b>36</b> |
| 2                  | LiHMDS <sup>c</sup> , eschenmoser's salt (10 eq.)                    | Recovery of <b>36</b> |
| 3                  | LDA <sup>c</sup> , eschenmoser's salt (10 eq.)                       | Recovery of <b>36</b> |
| 4                  | NaHMDS <sup>b</sup> , eschenmoser's salt (5 eq.)                     | Recovery of <b>36</b> |
| 5                  | KHMDS <sup>b</sup> , eschenmoser's salt (5 eq.)                      | Recovery of <b>36</b> |
| 6                  | LiTMP <sup>b</sup> , eschenmoser's salt (5 eq.)                      | Recovery of <b>36</b> |
| 7                  | LiHMDS <sup>b</sup> , 2-(hydroxymethyl)isoindoline-1,3-dione (3 eq.) | Recovery of <b>36</b> |
| 8                  | LiHMDS <sup>b</sup> methyl formate (5 eq.)                           | Recovery of <b>36</b> |
| 9                  | LiHMDS <sup>b</sup> paraformaldehyde (5 eq.)                         | Recovery of <b>36</b> |
| 10                 | LiHMDS <sup>b</sup> diethyl chlorophosphate (5 eq.)                  | Recovery of <b>36</b> |

<sup>a</sup> Reactions conducted on a 5 mg scale under nitrogen atmosphere in 0.05 M THF at -78 °C. <sup>b</sup> Base

(2 equiv). <sup>c</sup> Base (5 equiv).

## 2.33 Studies on the Methylation of C11 Position from **23**

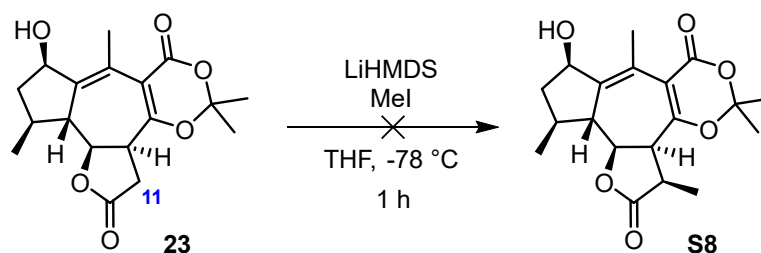

To a stirred solution of alcohol **23** (5.0 mg, 0.015 mmol) in anhydrous THF (0.3

mL) was added LiHMDS (45  $\mu$ L, 1 M in THF, 0.045 mmol) dropwise under nitrogen at -78  $^{\circ}$ C. The resultant mixture was stirred at -78  $^{\circ}$ C for 1 hour, MeI (9.3  $\mu$ L, 0.149 mmol) was added via a syringe and the reaction mixture was stirred at -78  $^{\circ}$ C for 1 hour. Upon completion, this reaction unfortunately provided a complex mixture.

### 2.34 Studies on the Methylation of C11 Position from **30**

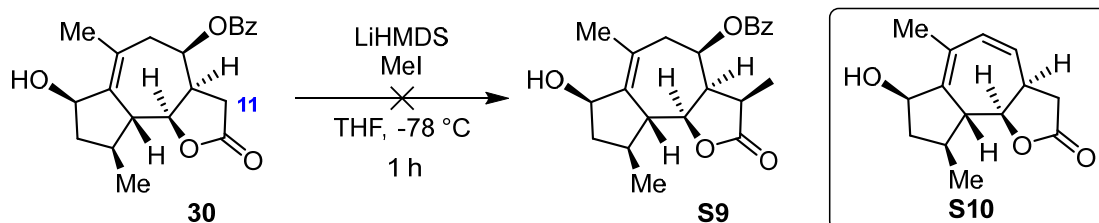

To a stirred solution of alcohol **30** (5 mg, 0.014 mmol) in anhydrous THF (0.28 mL) was added LiHMDS (42  $\mu$ L, 1 M in THF, 0.042 mmol) dropwise under nitrogen at -78  $^{\circ}$ C. The resultant mixture was stirred at -78  $^{\circ}$ C for 1 hour, MeI (8.7  $\mu$ L, 0.140 mmol) was added via a syringe and the reaction mixture was stirred at -78  $^{\circ}$ C for 1 hour. Upon completion, the reaction was quenched with H<sub>2</sub>O (1 mL). The mixture was washed with EtOAc (3 $\times$ 2 mL). The combined organic phases were washed with brine (5 mL), dried over anhydrous Na<sub>2</sub>SO<sub>4</sub>, filtered and concentrated under reduced pressure. The residue was purified by flash column chromatography on silica gel (petroleum ether/EtOAc = 3:1 to 1:1) to afford conjugated diene **S10** (2.6 mg, 79%) as a yellow oil.  $R_f$  = 0.21 (petroleum ether : ethyl acetate = 2:1).

$[\alpha]_D^{20}$  = -35.5 ( $c$  0.33, MeOH).

<sup>1</sup>H NMR (400 MHz, CDCl<sub>3</sub>)  $\delta$  5.97 (dd,  $J$  = 11.2, 2.2 Hz, 1H), 5.68 (dd,  $J$  = 11.2, 3.2 Hz, 1H), 4.82 (s, 1H), 4.43 (dd,  $J$  = 10.8, 9.6 Hz, 1H), 3.19 – 3.11 (m, 1H), 2.79 (dd,  $J$  = 18.0, 9.6 Hz, 1H), 2.49 (dd,  $J$  = 17.6, 6.8 Hz, 1H), 2.36 (d,  $J$  = 11.6 Hz, 1H), 2.33 – 2.29 (m, 1H), 2.27 – 2.20 (m, 1H), 1.93 (s, 3H), 1.62 – 1.57 (m, 2H), 1.19 (d,  $J$  = 7.2 Hz, 3H).

<sup>13</sup>C NMR (100 MHz, CDCl<sub>3</sub>)  $\delta$  175.70, 141.91, 134.03, 132.90, 130.44, 90.73, 73.63, 53.51, 42.67, 38.21, 35.77, 35.17, 22.73, 19.00.

HRMS (ESI): Calcd for C<sub>14</sub>H<sub>19</sub>O<sub>3</sub> [M+H]<sup>+</sup>: 235.1329, found: 235.1333.

### 2.35 Synthesis of 11-*epi*-badkhyisin **40**

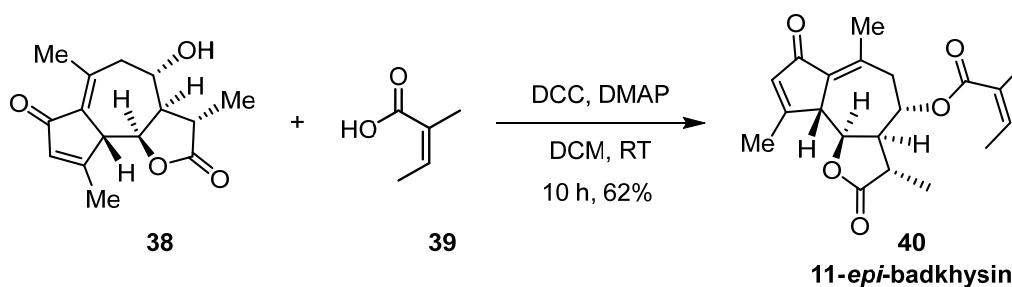

To a stirred solution of alcohol **38** (10.0 mg, 0.04 mmol) in DCM (0.38 mL) were added DCC (15.7 mg, 0.08 mmol), angelica acid **39** (7.6 mg, 0.08 mmol) and DMAP (9.3 mg, 0.08 mmol) at ambient temperature, and the mixture was stirred for 10 hours. Upon completion, the reaction was quenched with saturated aqueous solution of  $\text{NaHCO}_3$  (5 mL). The mixture was extracted with DCM (3×5 mL). The combined organic phases were washed with brine (20 mL), dried over anhydrous  $\text{Na}_2\text{SO}_4$ , filtered and concentrated under reduced pressure. The residue was purified by column chromatography on silica gel (petroleum ether/EtOAc = 10:1 to 5:1) to give **40** (8.2 mg, 62 %) as a colorless oil.

$R_f = 0.64$  (petroleum ether : ethyl acetate = 5:1).

$[\alpha]_D^{20} = +21.3$  ( $c$  0.16,  $\text{CHCl}_3$ ).

$^1\text{H NMR}$  (600 MHz,  $\text{CDCl}_3$ )  $\delta$  6.88 (q,  $J = 6.6$  Hz, 1H), 6.18 (s, 1H), 5.47 (t,  $J = 8.4$  Hz, 1H), 4.44 – 4.41 (m, 1H), 3.60 (d,  $J = 10.8$  Hz, 1H), 2.95 (d,  $J = 17.4$  Hz, 1H), 2.69 (p,  $J = 7.2$  Hz, 1H), 2.59 (q,  $J = 8.4$  Hz, 1H), 2.47 (dd,  $J = 18.0, 9.6$  Hz, 1H), 2.27 (d,  $J = 11.4$  Hz, 6H), 1.84 (s, 3H), 1.82 (s, 3H), 1.36 (d,  $J = 6.6$  Hz, 3H).

$^{13}\text{C NMR}$  (150 MHz,  $\text{CDCl}_3$ )  $\delta$  195.50, 177.63, 170.82, 166.96, 146.09, 139.08, 135.70, 129.09, 128.19, 80.22, 69.00, 50.15, 48.50, 42.63, 37.30, 20.44, 19.93, 16.10, 14.72, 12.20.

**HRMS** (ESI): Calcd for  $\text{C}_{20}\text{H}_{25}\text{O}_5$   $[\text{M}+\text{H}]^+$ : 345.1697, found: 345.1691.

### 3. Spectral Data Comparison

**Table S4.** Comparison of  $^1\text{H}$  NMR spectra

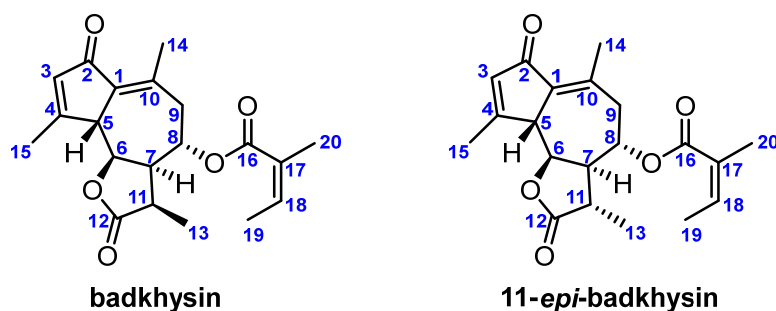

| <b>Position</b> | Natural sample<br><b>badkhysin</b><br>Dračinský (2012) <sup>2</sup><br>(600 MHz, $\text{CDCl}_3$ )<br>$\delta_{\text{H}}$ | Semi-synthetic sample<br><b>badkhysin</b><br>Alejandro (1994) <sup>3</sup><br>(300 MHz, $\text{CDCl}_3$ )<br>$\delta_{\text{H}}$ , mult ( $J$ in Hz) | Synthetic sample<br><b>11-<i>epi</i>-badkhysin</b><br>This work<br>(600 MHz, $\text{CDCl}_3$ )<br>$\delta_{\text{H}}$ , mult ( $J$ in Hz) |
|-----------------|---------------------------------------------------------------------------------------------------------------------------|------------------------------------------------------------------------------------------------------------------------------------------------------|-------------------------------------------------------------------------------------------------------------------------------------------|
| H-3             | 6.17                                                                                                                      | 6.09, m                                                                                                                                              | 6.18, s                                                                                                                                   |
| H-5             | 3.60                                                                                                                      | 3.54, d (10.9)                                                                                                                                       | 3.60, d (11)                                                                                                                              |
| H-6             | 4.46                                                                                                                      | 4.39, dd (10.6, 8.2)                                                                                                                                 | 4.43, m                                                                                                                                   |
| H-7             | 3.08                                                                                                                      | 3.04, dt (10.5, 8.4)                                                                                                                                 | 2.59, q (8.1)                                                                                                                             |
| H-8             | 5.50                                                                                                                      | 5.43, ddd (10.5, 9.5, 3.7)                                                                                                                           | 5.47, t (9.1)                                                                                                                             |
| H-9 $\alpha$    | 2.52                                                                                                                      | 2.46, dd (18.3, 9.4)                                                                                                                                 | 2.47, dd (17.9, 9.7)                                                                                                                      |
| H-9 $\beta$     | 2.94                                                                                                                      | 2.87, dd (18.4, 3.7)                                                                                                                                 | 2.95, d (17.8)                                                                                                                            |
| H-11            | 2.86                                                                                                                      | 2.78, dq (8.4, 7.8)                                                                                                                                  | 2.69, p (7.3)                                                                                                                             |
| H-13            | 1.35                                                                                                                      | 1.28, d                                                                                                                                              | 1.36, d (7.1)                                                                                                                             |
| H-14            | 2.29                                                                                                                      | 2.21, s                                                                                                                                              | 2.28, s                                                                                                                                   |
| H-15            | 2.26                                                                                                                      | 2.19, s                                                                                                                                              | 2.26, s                                                                                                                                   |
| H-18            | 6.18                                                                                                                      | 6.10, qq (7.3, 1.5)                                                                                                                                  | 6.88, q (6.5)                                                                                                                             |
| H-19            | 2.01                                                                                                                      | 1.93, dq (7.3, 1.5)                                                                                                                                  | 1.84, s                                                                                                                                   |
| H-20            | 1.89                                                                                                                      | 1.82, dq (1.5)                                                                                                                                       | 1.82, s                                                                                                                                   |

**Table S5.** Comparison of  $^{13}\text{C}$  NMR spectra

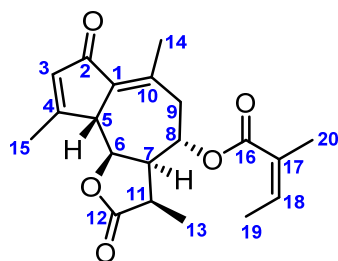

**badkhysin**

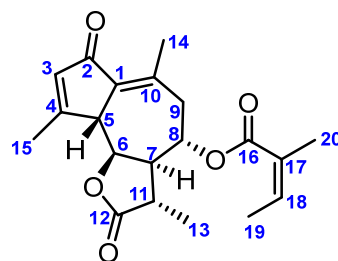

**11-*epi*-badkhysin**

| Position | Natural sample<br><b>badkhysin</b><br>Dračínský (2012) <sup>2</sup><br>(150 MHz, $\text{CDCl}_3$ )<br>$\delta_{\text{C}}$ | Semi-synthetic sample<br><b>Badkhysin</b><br>Alejandro (1994) <sup>3</sup><br>(100 MHz, $\text{CDCl}_3$ )<br>$\delta_{\text{C}}$ | Synthetic sample<br><b>11-<i>epi</i>-badkhysin</b><br>This work<br>(150 MHz, $\text{CDCl}_3$ )<br>$\delta_{\text{C}}$ |
|----------|---------------------------------------------------------------------------------------------------------------------------|----------------------------------------------------------------------------------------------------------------------------------|-----------------------------------------------------------------------------------------------------------------------|
| C-1      | 129.75                                                                                                                    | 129.7                                                                                                                            | 129.09                                                                                                                |
| C-2      | 195.22                                                                                                                    | 195.1                                                                                                                            | 195.50                                                                                                                |
| C-3      | 135.39                                                                                                                    | 139.8                                                                                                                            | 135.70                                                                                                                |
| C-4      | 169.64                                                                                                                    | 169.7                                                                                                                            | 170.82                                                                                                                |
| C-5      | 49.04                                                                                                                     | 48.9                                                                                                                             | 48.50                                                                                                                 |
| C-6      | 80.74                                                                                                                     | 80.6                                                                                                                             | 80.21                                                                                                                 |
| C-7      | 45.09                                                                                                                     | 37.1                                                                                                                             | 50.15                                                                                                                 |
| C-8      | 67.02                                                                                                                     | 67.0                                                                                                                             | 69.00                                                                                                                 |
| C-9      | 43.52                                                                                                                     | 43.4                                                                                                                             | 42.63                                                                                                                 |
| C-10     | 145.19                                                                                                                    | 145.1                                                                                                                            | 146.08                                                                                                                |
| C-11     | 37.19                                                                                                                     | 45.0                                                                                                                             | 37.30                                                                                                                 |
| C-12     | 176.02                                                                                                                    | 177.9                                                                                                                            | 177.63                                                                                                                |
| C-13     | 13.26                                                                                                                     | 13.1                                                                                                                             | 16.10                                                                                                                 |
| C-14     | 20.19                                                                                                                     | 19.5                                                                                                                             | 20.44                                                                                                                 |
| C-15     | 19.66                                                                                                                     | 20.3                                                                                                                             | 19.93                                                                                                                 |
| C-16     | 166.57                                                                                                                    | 166.5                                                                                                                            | 166.96                                                                                                                |
| C-17     | 126.95                                                                                                                    | 126.9                                                                                                                            | 128.19                                                                                                                |
| C-18     | 140.05                                                                                                                    | 135.2                                                                                                                            | 139.08                                                                                                                |
| C-19     | 15.89                                                                                                                     | 15.7                                                                                                                             | 12.20                                                                                                                 |
| C-20     | 20.48                                                                                                                     | 20.0                                                                                                                             | 14.72                                                                                                                 |

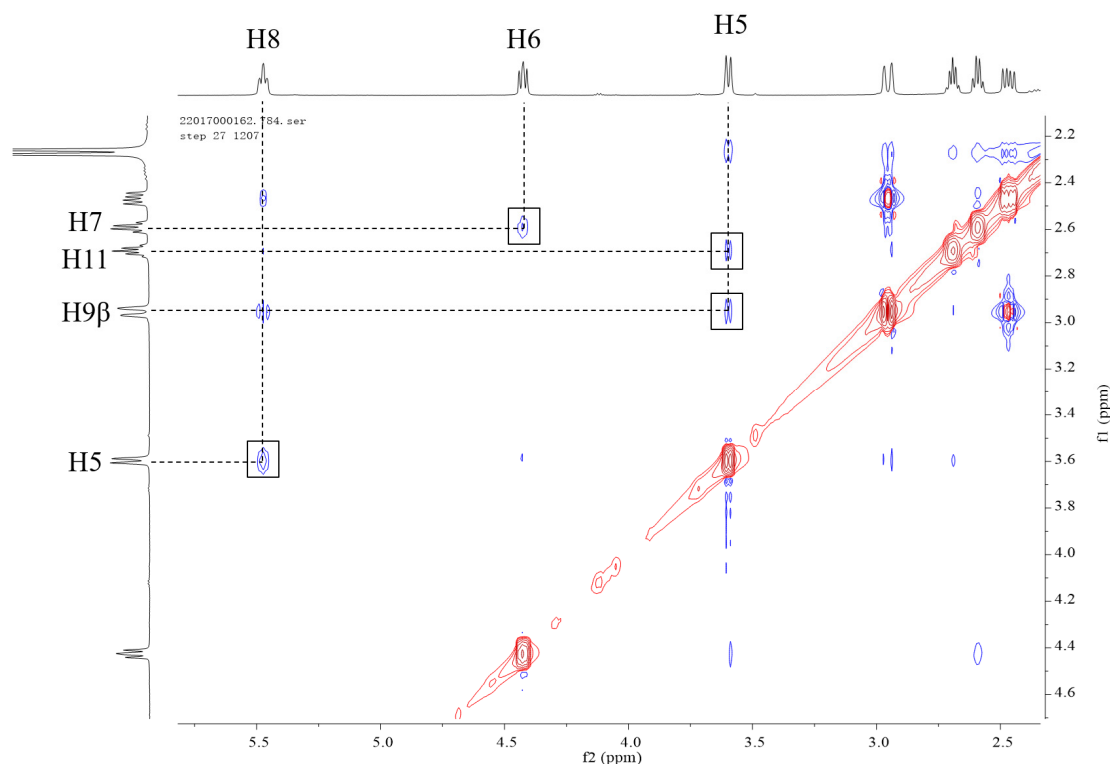

**Figure S1.** NOE signals for H5/H8, H5/H11, H5/H9 $\beta$  and H7/H6

## 4. X-Ray Single Crystal Diffraction Data

### 4.1 Compound 19 (CCDC: 2322258)

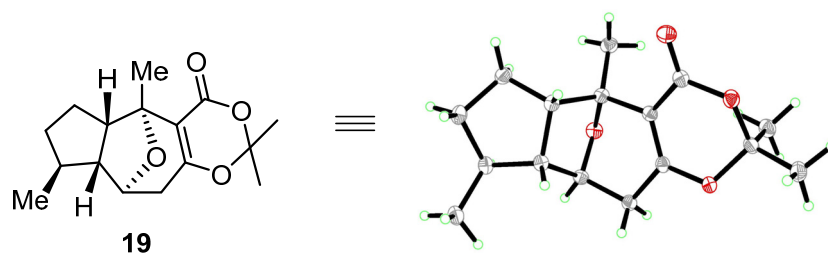

A specimen of  $C_{16}H_{22}O_4$ , approximate dimensions 0.310 mm x 0.360 mm x 0.380 mm, was used for the X-ray crystallographic analysis. The X-ray intensity data were measured ( $\lambda = 1.54178$  Å). The integration of the data using a monoclinic unit cell yielded a total of 7551 reflections to a maximum  $\theta$  angle of  $67.09^\circ$  (0.84 Å resolution), of which 2507 were independent (average redundancy 3.012, completeness = 98.5%,  $R_{\text{int}} = 4.95\%$ ,  $R_{\text{sig}} = 4.75\%$ ) and 2451 (97.77%) were greater than  $2\sigma(F^2)$ .

The final cell constants of  $a = 7.6552(16)$  Å,  $b = 5.6610(12)$  Å,  $c = 17.132(4)$  Å,  $\beta = 101.164(7)^\circ$ , volume =  $728.4(3)$  Å<sup>3</sup>, are based upon the refinement of the XYZ-centroids of

reflections above  $20\sigma(I)$ . The calculated minimum and maximum transmission coefficients (based on crystal size) are 0.5218 and 0.7528. The structure was solved and refined using the Bruker SHELXTL Software Package, using the space group  $P 1 2_1 1$ , with  $Z = 2$  for the formula unit,  $C_{16}H_{22}O_4$ . The final anisotropic full-matrix least-squares refinement on  $F^2$  with 185 variables converged at  $R1 = 3.71\%$ , for the observed data and  $wR2 = 9.49\%$  for all data. The goodness-of-fit was 1.060. The largest peak in the final difference electron density synthesis was  $0.154\text{ e}^-/\text{\AA}^3$  and the largest hole was  $-0.183\text{ e}^-/\text{\AA}^3$  with an RMS deviation of  $0.040\text{ e}^-/\text{\AA}^3$ . On the basis of the final model, the calculated density was  $1.269\text{ g/cm}^3$  and  $F(000)$ , 300  $e^-$ .

**Table S6. Sample and crystal data for 2322258**

|                               |                             |                            |
|-------------------------------|-----------------------------|----------------------------|
| <b>Identification code</b>    | <b>2322258</b>              |                            |
| <b>Chemical formula</b>       | $C_{16}H_{22}O_4$           |                            |
| <b>Formula weight</b>         | 278.33 g/mol                |                            |
| <b>Wavelength</b>             | 1.54178 $\text{\AA}$        |                            |
| <b>Crystal size</b>           | 0.310 x 0.360 x 0.380 mm    |                            |
| <b>Crystal system</b>         | monoclinic                  |                            |
| <b>Space group</b>            | $P 1 2_1 1$                 |                            |
| <b>Unit cell dimensions</b>   | $a = 7.6552(16)\text{ \AA}$ | $\alpha = 90^\circ$        |
|                               | $b = 5.6610(12)\text{ \AA}$ | $\beta = 101.164(7)^\circ$ |
|                               | $c = 17.132(4)\text{ \AA}$  | $\gamma = 90^\circ$        |
| <b>Volume</b>                 | 728.4(3) $\text{\AA}^3$     |                            |
| <b>Z</b>                      | 2                           |                            |
| <b>Density (calculated)</b>   | 1.269 g/cm <sup>3</sup>     |                            |
| <b>Absorption coefficient</b> | 0.733 mm <sup>-1</sup>      |                            |
| <b>F(000)</b>                 | 300                         |                            |

**Table S7. Data collection and structure refinement for 2322258**

|                                            |                                                                |  |
|--------------------------------------------|----------------------------------------------------------------|--|
| <b>Theta range for data collection</b>     | 2.63 to 67.09°                                                 |  |
| <b>Index ranges</b>                        | $-9 \leq h \leq 9$ , $-6 \leq k \leq 6$ , $-20 \leq l \leq 20$ |  |
| <b>Reflections collected</b>               | 7551                                                           |  |
| <b>Independent reflections</b>             | 2507 [ $R(\text{int}) = 0.0495$ ]                              |  |
| <b>Max. and min. transmission</b>          | 0.7528 and 0.5218                                              |  |
| <b>Structure solution technique</b>        | direct methods                                                 |  |
| <b>Structure solution program</b>          | SHELXT 2014/5 (Sheldrick, 2014)                                |  |
| <b>Refinement method</b>                   | Full-matrix least-squares on $F^2$                             |  |
| <b>Refinement program</b>                  | SHELXL 2018/3 (Sheldrick, 2015)                                |  |
| <b>Function minimized</b>                  | $\sum w(F_o^2 - F_c^2)^2$                                      |  |
| <b>Data / restraints / parameters</b>      | 2507 / 1 / 185                                                 |  |
| <b>Goodness-of-fit on <math>F^2</math></b> | 1.060                                                          |  |
| <b>Final R indices</b>                     | 2451 data; $I > 2\sigma(I)$ $R1 = 0.0371$ , $wR2 = 0.0939$     |  |

|                                     |                                                                           |                           |
|-------------------------------------|---------------------------------------------------------------------------|---------------------------|
|                                     | all data                                                                  | R1 = 0.0380, wR2 = 0.0949 |
| <b>Weighting scheme</b>             | $w=1/[\sigma^2(F_o^2)+(0.0306P)^2+0.2425P]$<br>where $P=(F_o^2+2F_c^2)/3$ |                           |
| <b>Absolute structure parameter</b> | 0.11(10)                                                                  |                           |
| <b>Largest diff. peak and hole</b>  | 0.154 and -0.183 eÅ <sup>-3</sup>                                         |                           |
| <b>R.M.S. deviation from mean</b>   | 0.040 eÅ <sup>-3</sup>                                                    |                           |

## 4.2 Compound 23 (CCDC: 2322305)

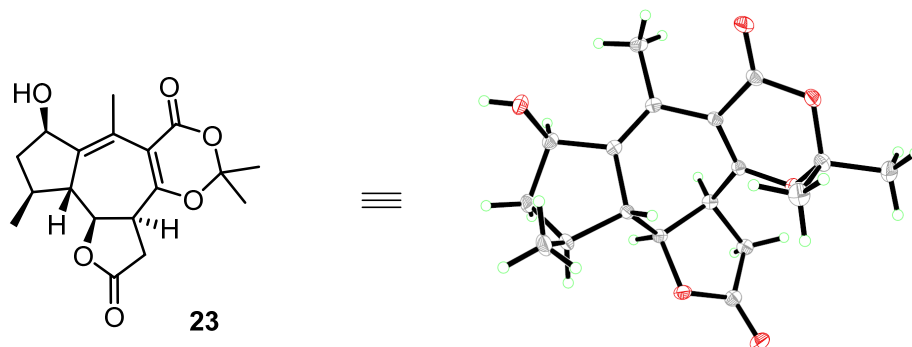

A specimen of C<sub>18</sub>H<sub>22</sub>O<sub>6</sub>, approximate dimensions 0.350 mm x 0.400 mm x 0.420 mm, was used for the X-ray crystallographic analysis. The X-ray intensity data were measured ( $\lambda = 1.54178$  Å). The integration of the data using an orthorhombic unit cell yielded a total of 22371 reflections to a maximum  $\theta$  angle of 68.18° (0.83 Å resolution), of which 3023 were independent (average redundancy 7.400, completeness = 99.3%,  $R_{\text{int}} = 3.85\%$ ,  $R_{\text{sig}} = 2.34\%$ ) and 3001 (99.27%) were greater than  $2\sigma(F^2)$ .

The final cell constants of  $a = 7.3182(12)$  Å,  $b = 11.8250(19)$  Å,  $c = 19.235(3)$  Å, volume = 1664.6(5) Å<sup>3</sup>, are based upon the refinement of the XYZ-centroids of reflections above 20  $\sigma(I)$ . The calculated minimum and maximum transmission coefficients (based on crystal size) are 0.6807 and 0.7531. The structure was solved and refined using the Bruker SHELXTL Software Package, using the space group P 21 21 21, with  $Z = 4$  for the formula unit, C<sub>18</sub>H<sub>22</sub>O<sub>6</sub>. The final anisotropic full-matrix least-squares refinement on  $F^2$  with 221 variables converged at  $R1 = 2.72\%$ , for the observed data and  $wR2 = 7.33\%$  for all data. The goodness-of-fit was 1.024. The largest peak in the final difference electron density synthesis was 0.138 e<sup>-</sup>/Å<sup>3</sup> and the largest hole was -0.173 e<sup>-</sup>/Å<sup>3</sup> with an RMS deviation of 0.034 e<sup>-</sup>/Å<sup>3</sup>. On the basis of the final model, the calculated density was 1.334 g/cm<sup>3</sup> and  $F(000)$ , 712 e<sup>-</sup>.

**Table S8. Sample and crystal data for 2322305**

|                               |                                                |         |
|-------------------------------|------------------------------------------------|---------|
| <b>Identification code</b>    | <b>2322305</b>                                 |         |
| <b>Chemical formula</b>       | C <sub>18</sub> H <sub>22</sub> O <sub>6</sub> |         |
| <b>Formula weight</b>         | 334.35 g/mol                                   |         |
| <b>Wavelength</b>             | 1.54178 Å                                      |         |
| <b>Crystal size</b>           | 0.350 x 0.400 x 0.420 mm                       |         |
| <b>Crystal system</b>         | orthorhombic                                   |         |
| <b>Space group</b>            | P 21 21 21                                     |         |
| <b>Unit cell dimensions</b>   | a = 7.3182(12) Å                               | α = 90° |
|                               | b = 11.8250(19) Å                              | β = 90° |
|                               | c = 19.235(3) Å                                | γ = 90° |
| <b>Volume</b>                 | 1664.6(5) Å <sup>3</sup>                       |         |
| <b>Z</b>                      | 4                                              |         |
| <b>Density (calculated)</b>   | 1.334 g/cm <sup>3</sup>                        |         |
| <b>Absorption coefficient</b> | 0.831 mm <sup>-1</sup>                         |         |
| <b>F(000)</b>                 | 712                                            |         |

**Table S9. Data collection and structure refinement for 2322305**

|                                         |                                                                                                                                                                       |                           |
|-----------------------------------------|-----------------------------------------------------------------------------------------------------------------------------------------------------------------------|---------------------------|
| <b>Theta range for data collection</b>  | 4.60 to 68.18°                                                                                                                                                        |                           |
| <b>Index ranges</b>                     | -8 ≤ h ≤ 8, -14 ≤ k ≤ 14, -23 ≤ l ≤ 22                                                                                                                                |                           |
| <b>Reflections collected</b>            | 22371                                                                                                                                                                 |                           |
| <b>Independent reflections</b>          | 3023 [R(int) = 0.0385]                                                                                                                                                |                           |
| <b>Max. and min. transmission</b>       | 0.7531 and 0.6807                                                                                                                                                     |                           |
| <b>Structure solution technique</b>     | direct methods                                                                                                                                                        |                           |
| <b>Structure solution program</b>       | SHELXT 2014/5 (Sheldrick, 2014)                                                                                                                                       |                           |
| <b>Refinement method</b>                | Full-matrix least-squares on F <sup>2</sup>                                                                                                                           |                           |
| <b>Refinement program</b>               | SHELXL 2018/3 (Sheldrick, 2015)                                                                                                                                       |                           |
| <b>Function minimized</b>               | Σ w(F <sub>o</sub> <sup>2</sup> - F <sub>c</sub> <sup>2</sup> ) <sup>2</sup>                                                                                          |                           |
| <b>Data / restraints / parameters</b>   | 3023 / 0 / 221                                                                                                                                                        |                           |
| <b>Goodness-of-fit on F<sup>2</sup></b> | 1.024                                                                                                                                                                 |                           |
| <b>Final R indices</b>                  | 3001 data; I > 2σ(I)                                                                                                                                                  | R1 = 0.0272, wR2 = 0.0731 |
|                                         | all data                                                                                                                                                              | R1 = 0.0274, wR2 = 0.0733 |
| <b>Weighting scheme</b>                 | w = 1/[σ <sup>2</sup> (F <sub>o</sub> <sup>2</sup> ) + (0.0464P) <sup>2</sup> + 0.2874P]<br>where P = (F <sub>o</sub> <sup>2</sup> + 2F <sub>c</sub> <sup>2</sup> )/3 |                           |
| <b>Absolute structure parameter</b>     | 0.11(4)                                                                                                                                                               |                           |
| <b>Largest diff. peak and hole</b>      | 0.138 and -0.173 eÅ <sup>-3</sup>                                                                                                                                     |                           |
| <b>R.M.S. deviation from mean</b>       | 0.034 eÅ <sup>-3</sup>                                                                                                                                                |                           |

### 4.3 Compound 26 (CCDC: 2322268)

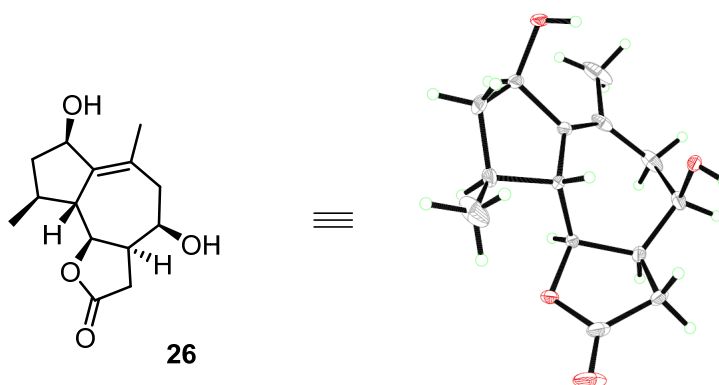

A specimen of  $C_{14}H_{20}O_4$ , approximate dimensions 0.160 mm x 0.170 mm x 0.190 mm, was used for the X-ray crystallographic analysis. The X-ray intensity data were measured ( $\lambda = 1.54178$  Å). The integration of the data using a trigonal unit cell yielded a total of 58155 reflections to a maximum  $\theta$  angle of  $77.37^\circ$  (0.79 Å resolution), of which 5704 were independent (average redundancy 10.195, completeness = 99.9%,  $R_{\text{int}} = 3.28\%$ ,  $R_{\text{sig}} = 1.38\%$ ) and 5682 (99.61%) were greater than  $2\sigma(F^2)$ .

The final cell constants of  $a = 9.3343(3)$  Å,  $b = 9.3343(3)$  Å,  $c = 26.7238(16)$  Å, volume =  $2016.47(18)$  Å<sup>3</sup>, are based upon the refinement of the XYZ-centroids of reflections above  $20\sigma(I)$ . The calculated minimum and maximum transmission coefficients (based on crystal size) are 0.6781 and 0.7541. The structure was solved and refined using the Bruker SHELXTL Software Package, using the space group P 32, with  $Z = 6$  for the formula unit,  $C_{14}H_{20}O_4$ . The final anisotropic full-matrix least-squares refinement on  $F^2$  with 333 variables converged at  $R1 = 2.93\%$ , for the observed data and  $wR2 = 7.73\%$  for all data. The goodness-of-fit was 1.049. The largest peak in the final difference electron density synthesis was  $0.157 \text{ e}^-/\text{\AA}^3$  and the largest hole was  $-0.193 \text{ e}^-/\text{\AA}^3$  with an RMS deviation of  $0.034 \text{ e}^-/\text{\AA}^3$ . On the basis of the final model, the calculated density was  $1.247 \text{ g/cm}^3$  and  $F(000)$ , 816  $e^-$ .

**Table S10. Sample and crystal data for 2322268**

|                            |                   |
|----------------------------|-------------------|
| <b>Identification code</b> | <b>2322268</b>    |
| <b>Chemical formula</b>    | $C_{14}H_{20}O_4$ |
| <b>Formula weight</b>      | 252.30 g/mol      |
| <b>Wavelength</b>          | 1.54178 Å         |

|                               |                            |                      |
|-------------------------------|----------------------------|----------------------|
| <b>Crystal size</b>           | 0.160 x 0.170 x 0.190 mm   |                      |
| <b>Crystal system</b>         | trigonal                   |                      |
| <b>Space group</b>            | P 32                       |                      |
| <b>Unit cell dimensions</b>   | a = 9.3343(3) Å            | $\alpha = 90^\circ$  |
|                               | b = 9.3343(3) Å            | $\beta = 90^\circ$   |
|                               | c = 26.7238(16) Å          | $\gamma = 120^\circ$ |
| <b>Volume</b>                 | 2016.47(18) Å <sup>3</sup> |                      |
| <b>Z</b>                      | 6                          |                      |
| <b>Density (calculated)</b>   | 1.247 g/cm <sup>3</sup>    |                      |
| <b>Absorption coefficient</b> | 0.740 mm <sup>-1</sup>     |                      |
| <b>F(000)</b>                 | 816                        |                      |

**Table S11. Data collection and structure refinement for 2322268**

|                                         |                                                   |                           |
|-----------------------------------------|---------------------------------------------------|---------------------------|
| <b>Theta range for data collection</b>  | 4.96 to 77.37°                                    |                           |
| <b>Index ranges</b>                     | -11 ≤ h ≤ 10, -11 ≤ k ≤ 11, -33 ≤ l ≤ 33          |                           |
| <b>Reflections collected</b>            | 58155                                             |                           |
| <b>Independent reflections</b>          | 5704 [R(int) = 0.0328]                            |                           |
| <b>Max. and min. transmission</b>       | 0.7541 and 0.6781                                 |                           |
| <b>Structure solution technique</b>     | direct methods                                    |                           |
| <b>Structure solution program</b>       | SHELXT 2018/2 (Sheldrick, 2018)                   |                           |
| <b>Refinement method</b>                | Full-matrix least-squares on F <sup>2</sup>       |                           |
| <b>Refinement program</b>               | SHELXL 2018/3 (Sheldrick, 2015)                   |                           |
| <b>Function minimized</b>               | $\Sigma w(F_o^2 - F_c^2)^2$                       |                           |
| <b>Data / restraints / parameters</b>   | 5704 / 1 / 333                                    |                           |
| <b>Goodness-of-fit on F<sup>2</sup></b> | 1.049                                             |                           |
| <b>Final R indices</b>                  | 5682 data; I > 2σ(I)                              | R1 = 0.0293, wR2 = 0.0772 |
|                                         | all data                                          | R1 = 0.0294, wR2 = 0.0773 |
| <b>Weighting scheme</b>                 | $w = 1/[\sigma^2(F_o^2) + (0.0449P)^2 + 0.3760P]$ |                           |
|                                         | where $P = (F_o^2 + 2F_c^2)/3$                    |                           |
| <b>Absolute structure parameter</b>     | 0.00(2)                                           |                           |
| <b>Largest diff. peak and hole</b>      | 0.157 and -0.193 eÅ <sup>-3</sup>                 |                           |
| <b>R.M.S. deviation from mean</b>       | 0.034 eÅ <sup>-3</sup>                            |                           |

#### 4.4 Compound 33 (CCDC: 2324246)

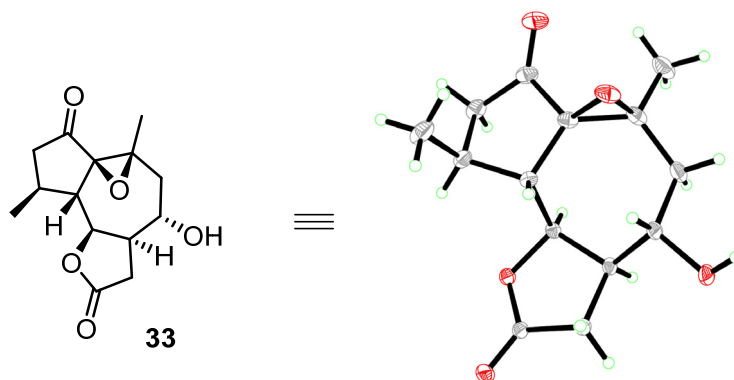

A specimen of C<sub>14</sub>H<sub>18</sub>O<sub>5</sub>, approximate dimensions 0.200 mm x 0.230 mm x 0.240 mm, was used for the X-ray crystallographic analysis. The X-ray intensity data were measured ( $\lambda = 1.54178$  Å). The integration of the data using a monoclinic unit cell yielded a total of 19174 reflections to a maximum  $\theta$  angle of 77.59° (0.79 Å resolution), of which 2907 were independent (average redundancy 6.596, completeness = 99.6%,  $R_{\text{int}} = 3.25\%$ ,  $R_{\text{sig}} = 2.28\%$ ) and 2858 (98.31%) were greater than  $2\sigma(F^2)$ .

The final cell constants of  $a = 7.83220(10)$  Å,  $b = 6.90300(10)$  Å,  $c = 13.3006(3)$  Å,  $\beta = 104.2910(10)^\circ$ , volume = 696.85(2) Å<sup>3</sup>, are based upon the refinement of the XYZ-centroids of reflections above  $20\sigma(I)$ . The calculated minimum and maximum transmission coefficients (based on crystal size) are 0.6457 and 0.7541. The structure was solved and refined using the Bruker SHELXTL Software Package, using the space group P 1 21 1, with  $Z = 2$  for the formula unit, C<sub>14</sub>H<sub>18</sub>O<sub>5</sub>. The final anisotropic full-matrix least-squares refinement on  $F^2$  with 176 variables converged at  $R1 = 3.41\%$ , for the observed data and  $wR2 = 10.18\%$  for all data. The goodness-of-fit was 1.035. The largest peak in the final difference electron density synthesis was 0.169 e<sup>-</sup>/Å<sup>3</sup> and the largest hole was -0.119 e<sup>-</sup>/Å<sup>3</sup> with an RMS deviation of 0.032 e<sup>-</sup>/Å<sup>3</sup>. On the basis of the final model, the calculated density was 1.269 g/cm<sup>3</sup> and  $F(000)$ , 284 e<sup>-</sup>.

**Table S12. Sample and crystal data for 2324246**

|                               |                                                |                              |
|-------------------------------|------------------------------------------------|------------------------------|
| <b>Identification code</b>    | <b>2324246</b>                                 |                              |
| <b>Chemical formula</b>       | C <sub>14</sub> H <sub>18</sub> O <sub>5</sub> |                              |
| <b>Formula weight</b>         | 266.28 g/mol                                   |                              |
| <b>Wavelength</b>             | 1.54178 Å                                      |                              |
| <b>Crystal size</b>           | 0.200 x 0.230 x 0.240 mm                       |                              |
| <b>Crystal system</b>         | monoclinic                                     |                              |
| <b>Space group</b>            | P 1 21 1                                       |                              |
| <b>Unit cell dimensions</b>   | $a = 7.83220(10)$ Å                            | $\alpha = 90^\circ$          |
|                               | $b = 6.90300(10)$ Å                            | $\beta = 104.2910(10)^\circ$ |
|                               | $c = 13.3006(3)$ Å                             | $\gamma = 90^\circ$          |
| <b>Volume</b>                 | 696.85(2) Å <sup>3</sup>                       |                              |
| <b>Z</b>                      | 2                                              |                              |
| <b>Density (calculated)</b>   | 1.269 g/cm <sup>3</sup>                        |                              |
| <b>Absorption coefficient</b> | 0.801 mm <sup>-1</sup>                         |                              |
| <b>F(000)</b>                 | 284                                            |                              |

**Table S13. Data collection and structure refinement for 2324246**

|                                         |                                                                                                                                                               |
|-----------------------------------------|---------------------------------------------------------------------------------------------------------------------------------------------------------------|
| <b>Theta range for data collection</b>  | 3.43 to 77.59°                                                                                                                                                |
| <b>Index ranges</b>                     | -9<= <i>h</i> <=9, -8<= <i>k</i> <=8, -16<= <i>l</i> <=16                                                                                                     |
| <b>Reflections collected</b>            | 19174                                                                                                                                                         |
| <b>Independent reflections</b>          | 2907 [R(int) = 0.0325]                                                                                                                                        |
| <b>Max. and min. transmission</b>       | 0.7541 and 0.6457                                                                                                                                             |
| <b>Structure solution technique</b>     | direct methods                                                                                                                                                |
| <b>Structure solution program</b>       | SHELXT 2018/2 (Sheldrick, 2018)                                                                                                                               |
| <b>Refinement method</b>                | Full-matrix least-squares on F <sup>2</sup>                                                                                                                   |
| <b>Refinement program</b>               | SHELXL 2018/3 (Sheldrick, 2015)                                                                                                                               |
| <b>Function minimized</b>               | $\sum w(F_o^2 - F_c^2)^2$                                                                                                                                     |
| <b>Data / restraints / parameters</b>   | 2907 / 1 / 176                                                                                                                                                |
| <b>Goodness-of-fit on F<sup>2</sup></b> | 1.035                                                                                                                                                         |
| <b>Final R indices</b>                  | 2858 data; I>2σ(I)      R1 = 0.0341, wR2 = 0.1011<br>all data      R1 = 0.0350, wR2 = 0.1018                                                                  |
| <b>Weighting scheme</b>                 | w=1/[σ <sup>2</sup> (F <sub>o</sub> <sup>2</sup> )+(0.0726P) <sup>2</sup> +0.0251P]<br>where P=(F <sub>o</sub> <sup>2</sup> +2F <sub>c</sub> <sup>2</sup> )/3 |
| <b>Absolute structure parameter</b>     | 0.09(3)                                                                                                                                                       |
| <b>Extinction coefficient</b>           | 0.0230(40)                                                                                                                                                    |
| <b>Largest diff. peak and hole</b>      | 0.169 and -0.119 eÅ <sup>-3</sup>                                                                                                                             |
| <b>R.M.S. deviation from mean</b>       | 0.032 eÅ <sup>-3</sup>                                                                                                                                        |

#### 4.5 Compound 38 (CCDC: 2324247)

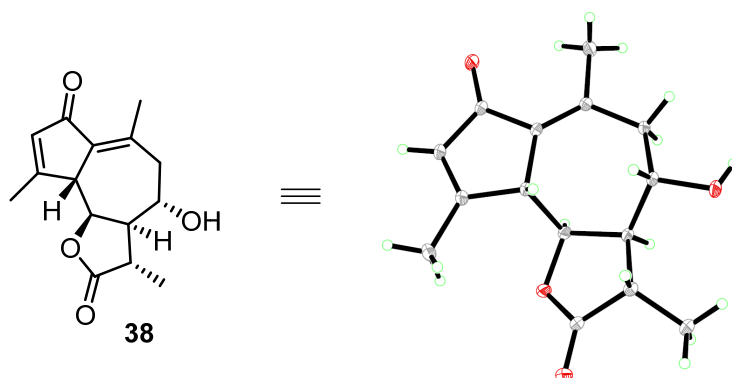

A specimen of C<sub>15</sub>H<sub>20</sub>O<sub>5</sub>, approximate dimensions 0.130 mm x 0.180 mm x 0.240 mm, was used for the X-ray crystallographic analysis. The X-ray intensity data were measured ( $\lambda$  = 1.54178 Å). The integration of the data using a monoclinic unit cell yielded a total of 19587 reflections to a maximum  $\theta$  angle of 77.76° (0.79 Å resolution), of which 3028 were independent (average redundancy 6.469, completeness = 99.4%, R<sub>int</sub> = 2.99%, R<sub>sig</sub> = 2.16%) and 2986 (98.61%) were greater than 2σ(F<sup>2</sup>).

The final cell constants of  $a$  = 9.5642(3) Å,  $b$  = 7.7285(2) Å,  $c$  = 10.2740(3) Å,  $\beta$  = 103.7530(10)°, volume = 737.65(4) Å<sup>3</sup>, are based upon the refinement of the XYZ-centroids of

reflections above  $20 \sigma(I)$ . The calculated minimum and maximum transmission coefficients (based on crystal size) are 0.5877 and 0.7541. The structure was solved and refined using the Bruker SHELXTL Software Package, using the space group  $P 1 2_1 1$ , with  $Z = 2$  for the formula unit,  $C_{15}H_{20}O_5$ . The final anisotropic full-matrix least-squares refinement on  $F^2$  with 188 variables converged at  $R1 = 3.90\%$ , for the observed data and  $wR2 = 11.03\%$  for all data. The goodness-of-fit was 1.048. The largest peak in the final difference electron density synthesis was  $0.209 \text{ e}^-/\text{\AA}^3$  and the largest hole was  $-0.168 \text{ e}^-/\text{\AA}^3$  with an RMS deviation of  $0.033 \text{ e}^-/\text{\AA}^3$ . On the basis of the final model, the calculated density was  $1.262 \text{ g/cm}^3$  and  $F(000)$ , 300  $e^-$ .

**Table S14. Sample and crystal data for 2324247**

|                               |                            |                              |
|-------------------------------|----------------------------|------------------------------|
| <b>Identification code</b>    | <b>2324247</b>             |                              |
| <b>Chemical formula</b>       | $C_{15}H_{20}O_5$          |                              |
| <b>Formula weight</b>         | 280.31 g/mol               |                              |
| <b>Wavelength</b>             | 1.54178 Å                  |                              |
| <b>Crystal size</b>           | 0.130 x 0.180 x 0.240 mm   |                              |
| <b>Crystal system</b>         | monoclinic                 |                              |
| <b>Space group</b>            | $P 1 2_1 1$                |                              |
| <b>Unit cell dimensions</b>   | $a = 9.5642(3) \text{ Å}$  | $\alpha = 90^\circ$          |
|                               | $b = 7.7285(2) \text{ Å}$  | $\beta = 103.7530(10)^\circ$ |
|                               | $c = 10.2740(3) \text{ Å}$ | $\gamma = 90^\circ$          |
| <b>Volume</b>                 | $737.65(4) \text{ Å}^3$    |                              |
| <b>Z</b>                      | 2                          |                              |
| <b>Density (calculated)</b>   | $1.262 \text{ g/cm}^3$     |                              |
| <b>Absorption coefficient</b> | $0.781 \text{ mm}^{-1}$    |                              |
| <b>F(000)</b>                 | 300                        |                              |

**Table S15. Data collection and structure refinement for 2324247**

|                                            |                                                                  |                                |
|--------------------------------------------|------------------------------------------------------------------|--------------------------------|
| <b>Theta range for data collection</b>     | 7.24 to $77.76^\circ$                                            |                                |
| <b>Index ranges</b>                        | $-12 \leq h \leq 12$ , $-9 \leq k \leq 8$ , $-13 \leq l \leq 12$ |                                |
| <b>Reflections collected</b>               | 19587                                                            |                                |
| <b>Independent reflections</b>             | 3028 [ $R(\text{int}) = 0.0299$ ]                                |                                |
| <b>Max. and min. transmission</b>          | 0.7541 and 0.5877                                                |                                |
| <b>Structure solution technique</b>        | direct methods                                                   |                                |
| <b>Structure solution program</b>          | SHELXT 2018/2 (Sheldrick, 2018)                                  |                                |
| <b>Refinement method</b>                   | Full-matrix least-squares on $F^2$                               |                                |
| <b>Refinement program</b>                  | SHELXL 2018/3 (Sheldrick, 2015)                                  |                                |
| <b>Function minimized</b>                  | $\Sigma w(F_o^2 - F_c^2)^2$                                      |                                |
| <b>Data / restraints / parameters</b>      | 3028 / 1 / 188                                                   |                                |
| <b>Goodness-of-fit on <math>F^2</math></b> | 1.048                                                            |                                |
| <b>Final R indices</b>                     | 2986 data; $I > 2\sigma(I)$                                      | $R1 = 0.0390$ , $wR2 = 0.1094$ |

|                                     |                                                                           |                                |
|-------------------------------------|---------------------------------------------------------------------------|--------------------------------|
|                                     | all data                                                                  | $R1 = 0.0395$ , $wR2 = 0.1103$ |
| <b>Weighting scheme</b>             | $w=1/[\sigma^2(F_o^2)+(0.0675P)^2+0.0773P]$<br>where $P=(F_o^2+2F_c^2)/3$ |                                |
| <b>Absolute structure parameter</b> | -0.05(10)                                                                 |                                |
| <b>Largest diff. peak and hole</b>  | 0.209 and -0.168 eÅ <sup>-3</sup>                                         |                                |
| <b>R.M.S. deviation from mean</b>   | 0.033 eÅ <sup>-3</sup>                                                    |                                |

## 5. Copies of $^1\text{H}$ NMR, $^{13}\text{C}$ NMR and 2D NMR Spectra

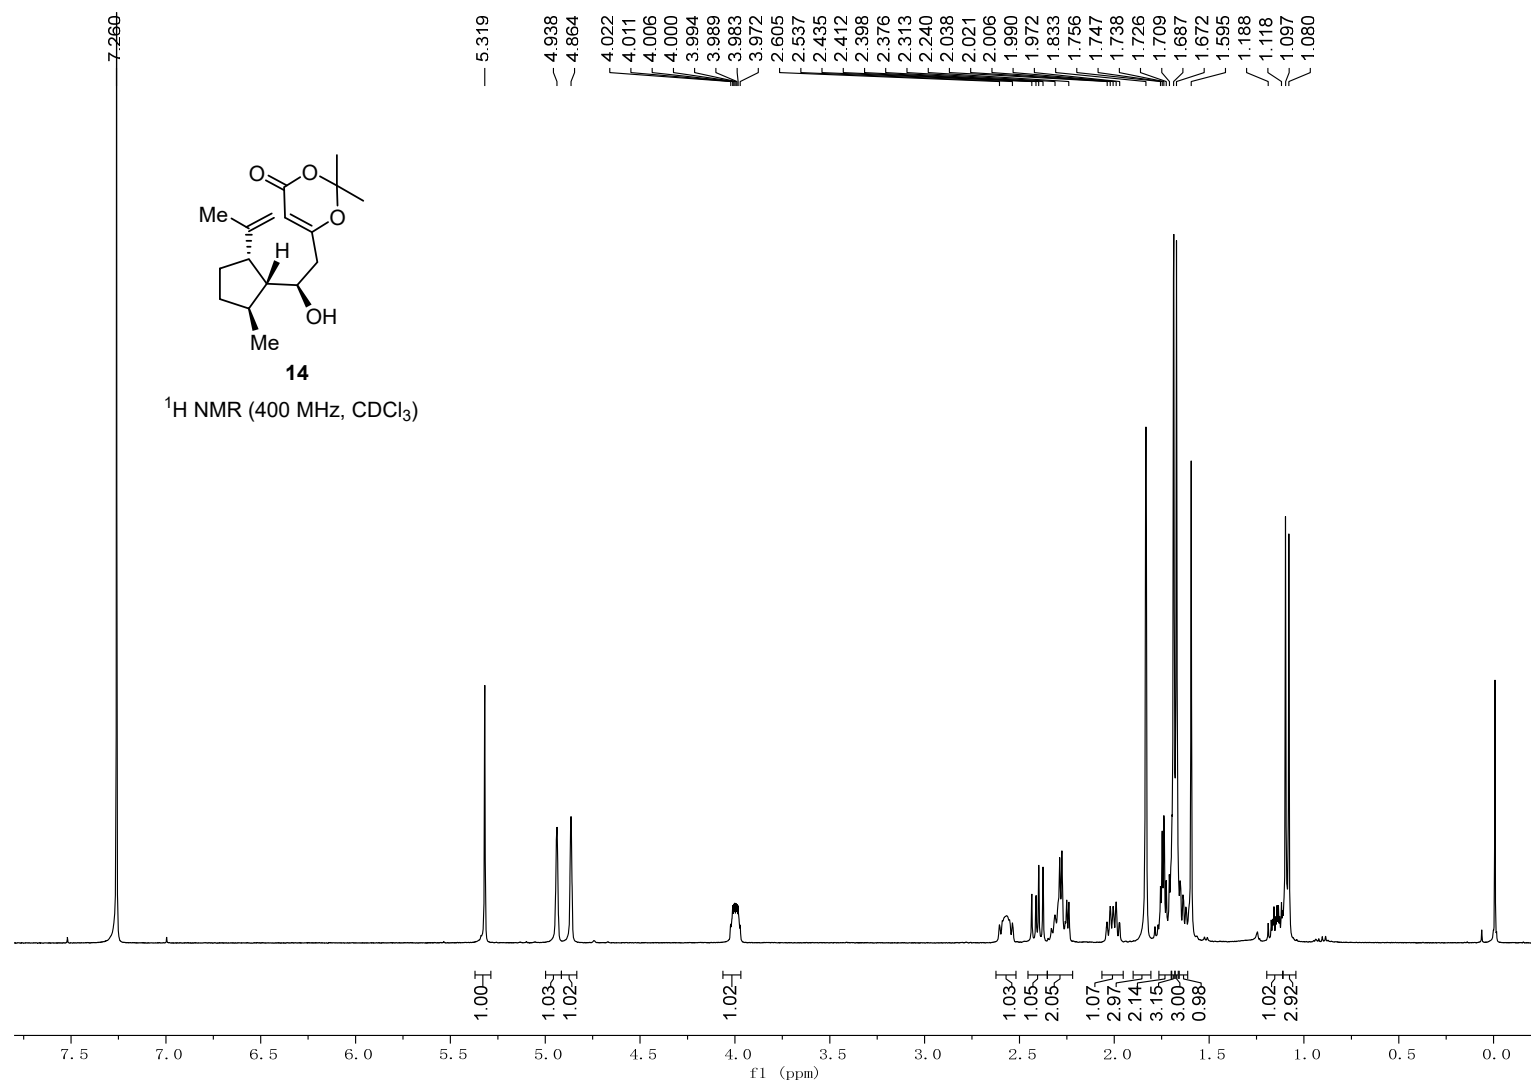

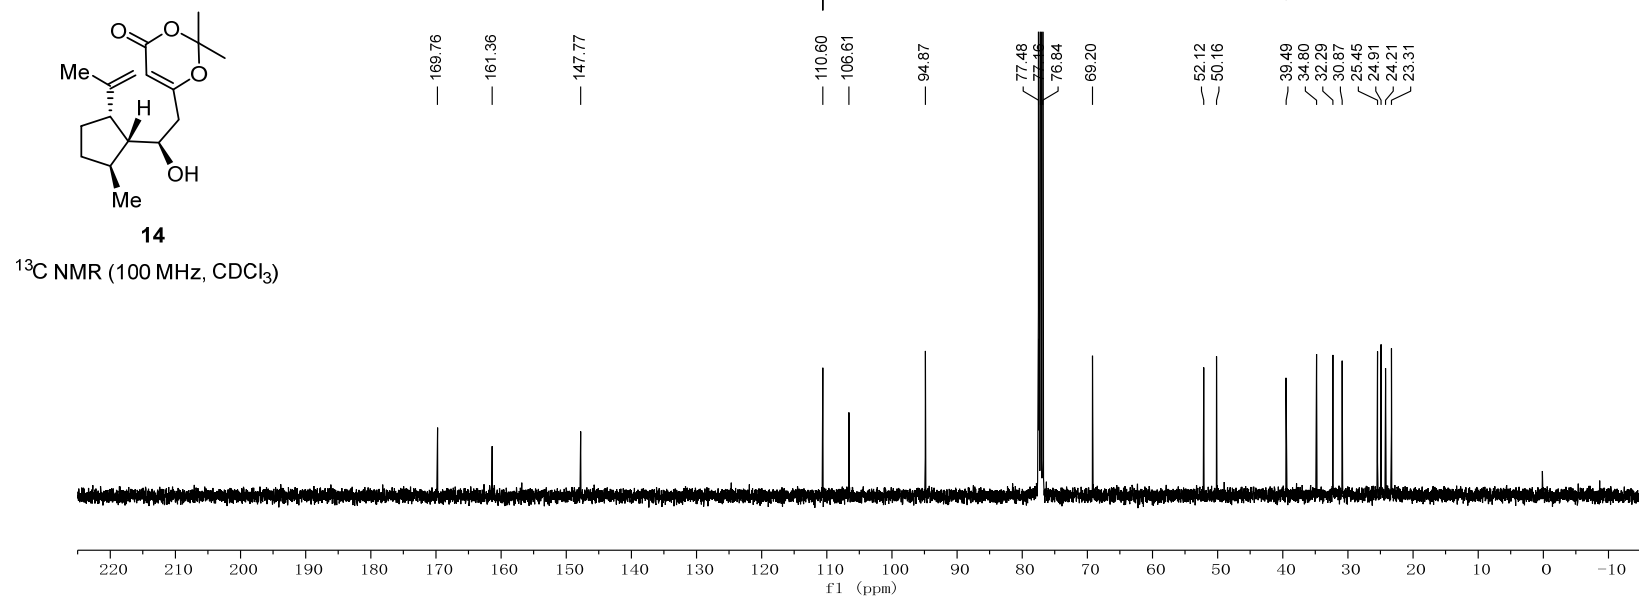

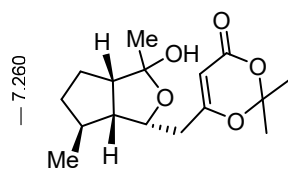

**15**

$^1\text{H}$  NMR (400 MHz,  $\text{CDCl}_3$ )

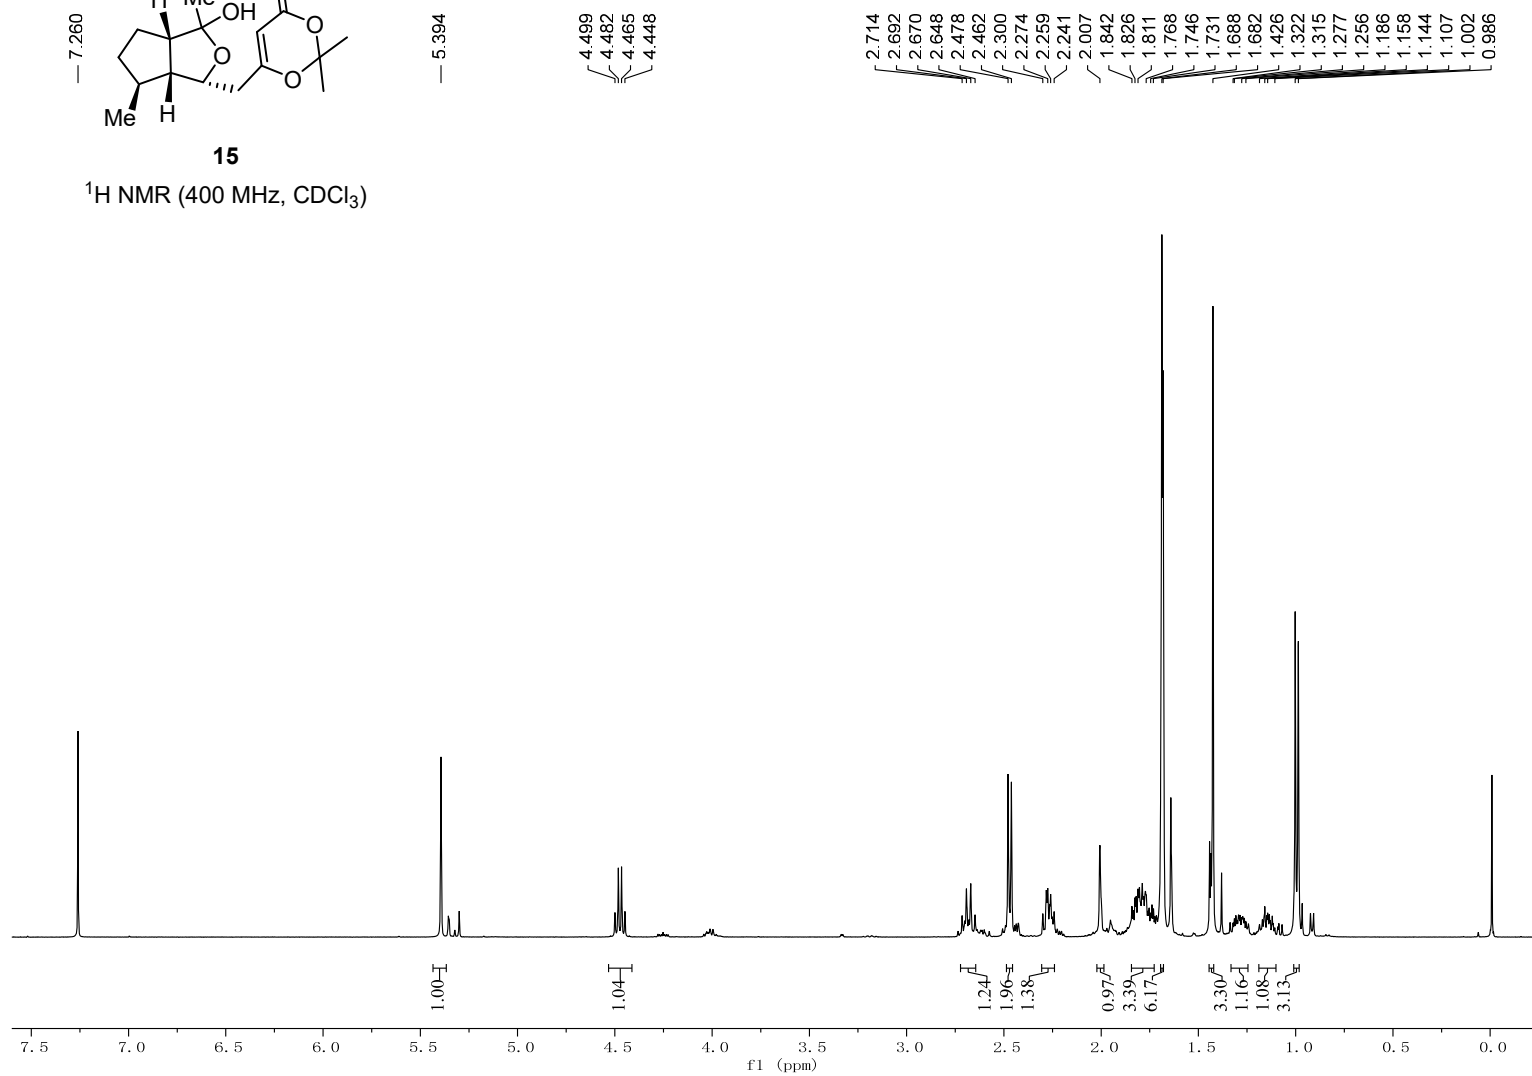

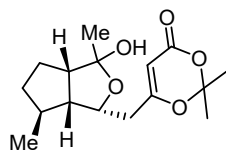

**15**

$^{13}\text{C}$  NMR (100 MHz,  $\text{CDCl}_3$ )

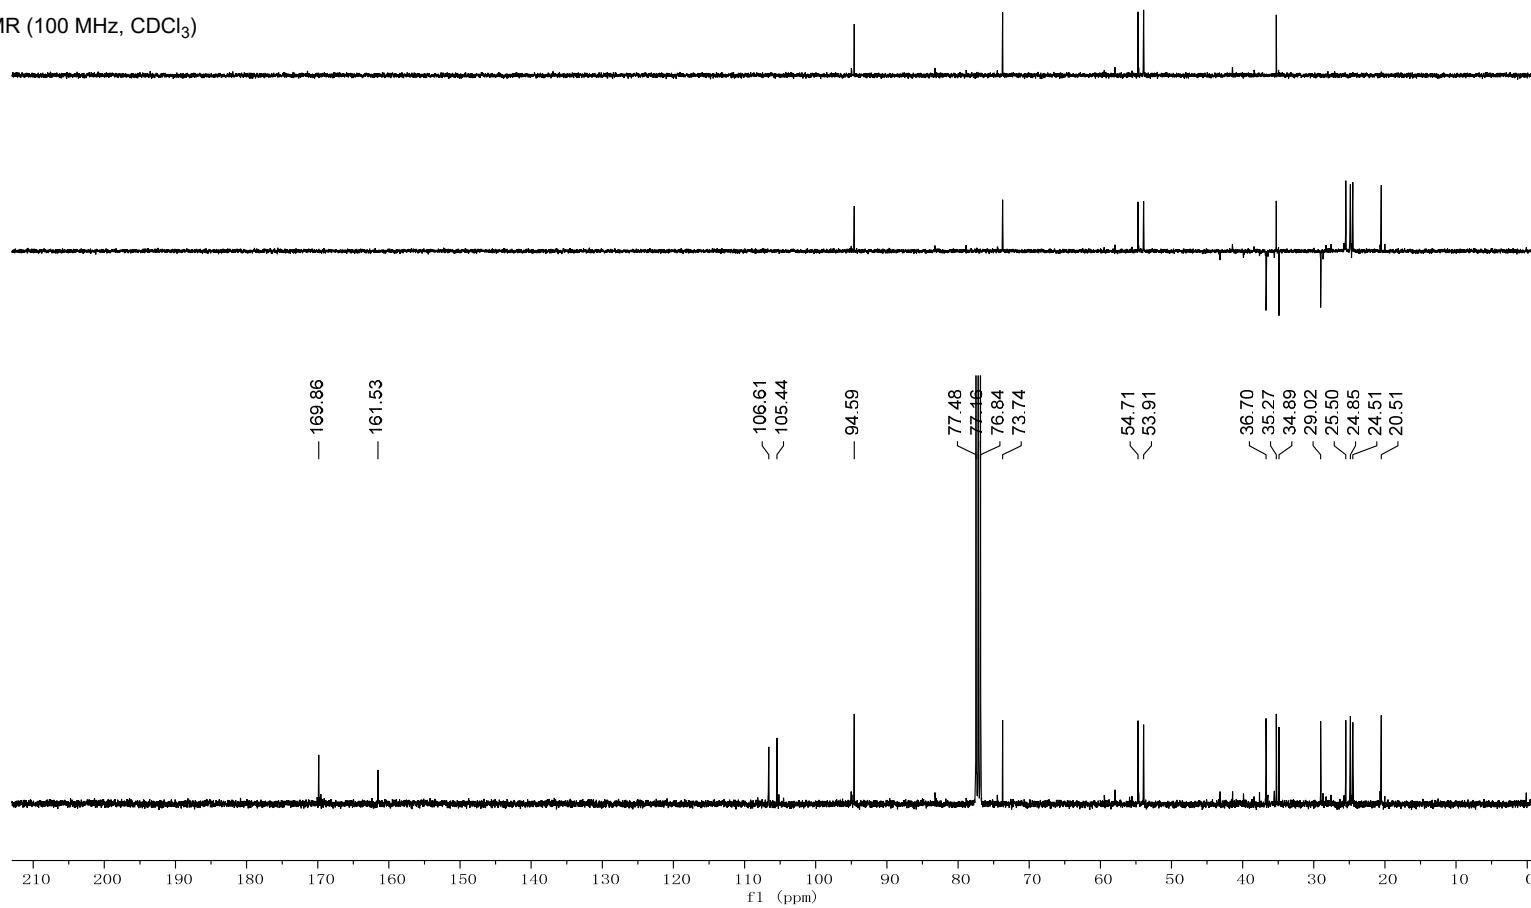

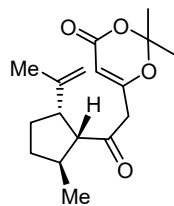

**16**

<sup>1</sup>H NMR (600 MHz, CDCl<sub>3</sub>)

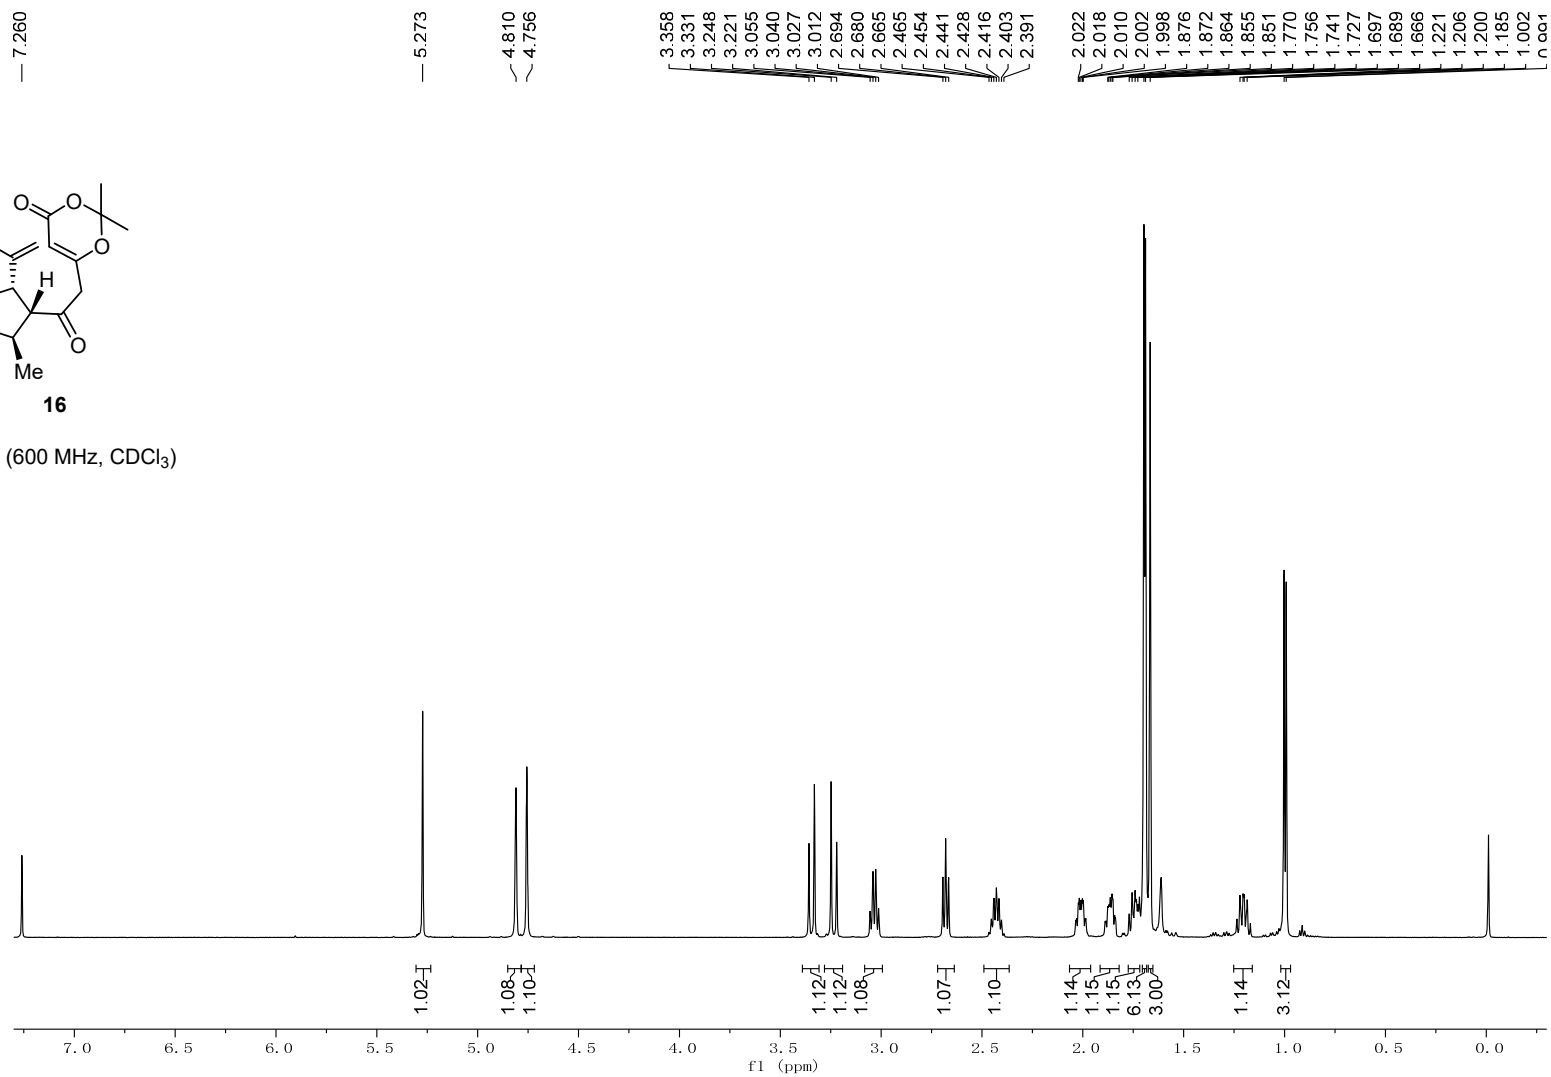

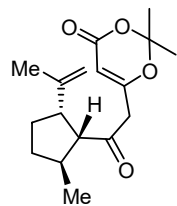

**16**

$^{13}\text{C}$  NMR (150 MHz,  $\text{CDCl}_3$ )

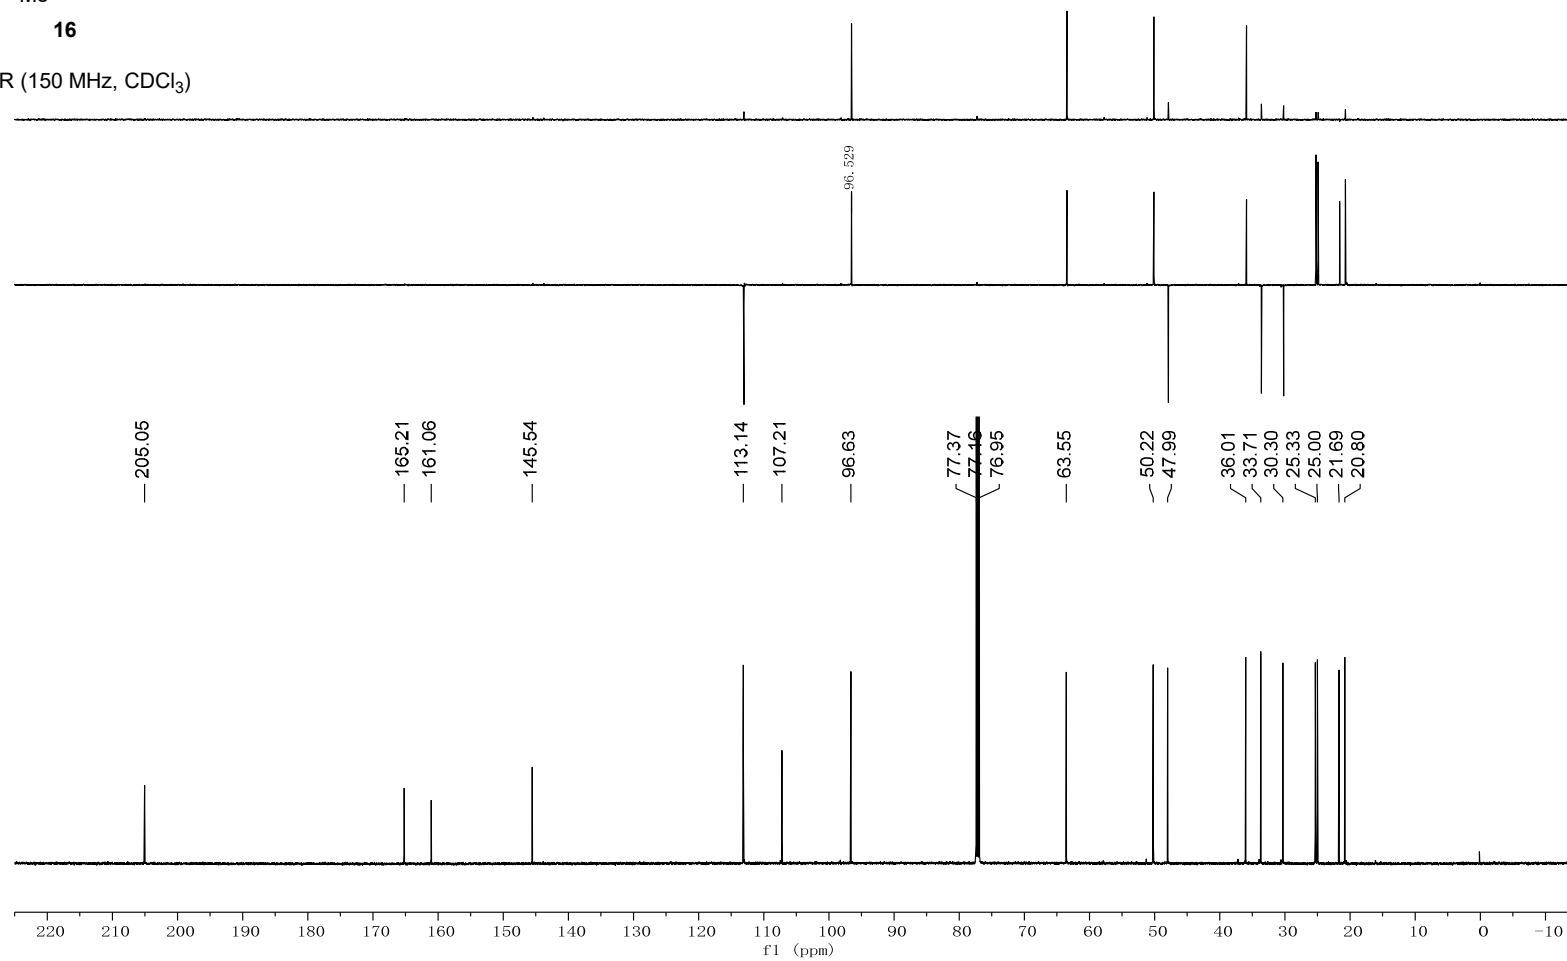

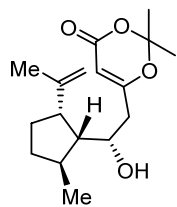

17

<sup>1</sup>H NMR (400 MHz, CDCl<sub>3</sub>)

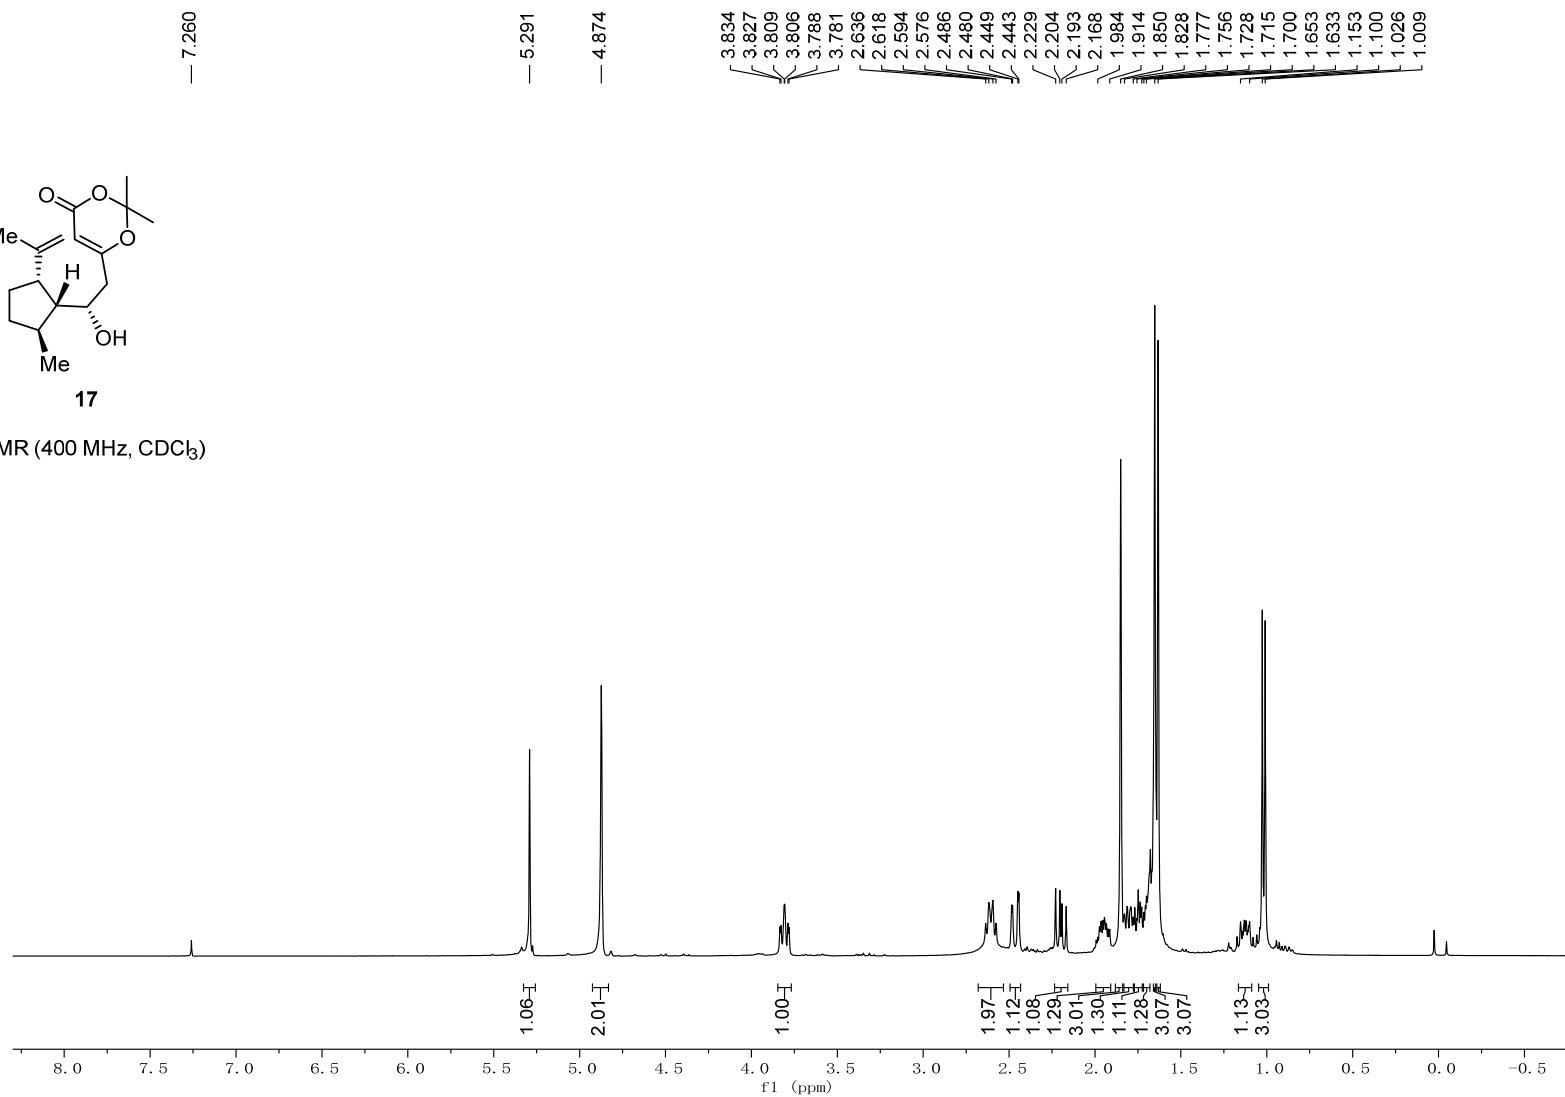

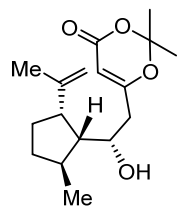

17

$^{13}\text{C}$  NMR (100 MHz,  $\text{CDCl}_3$ )

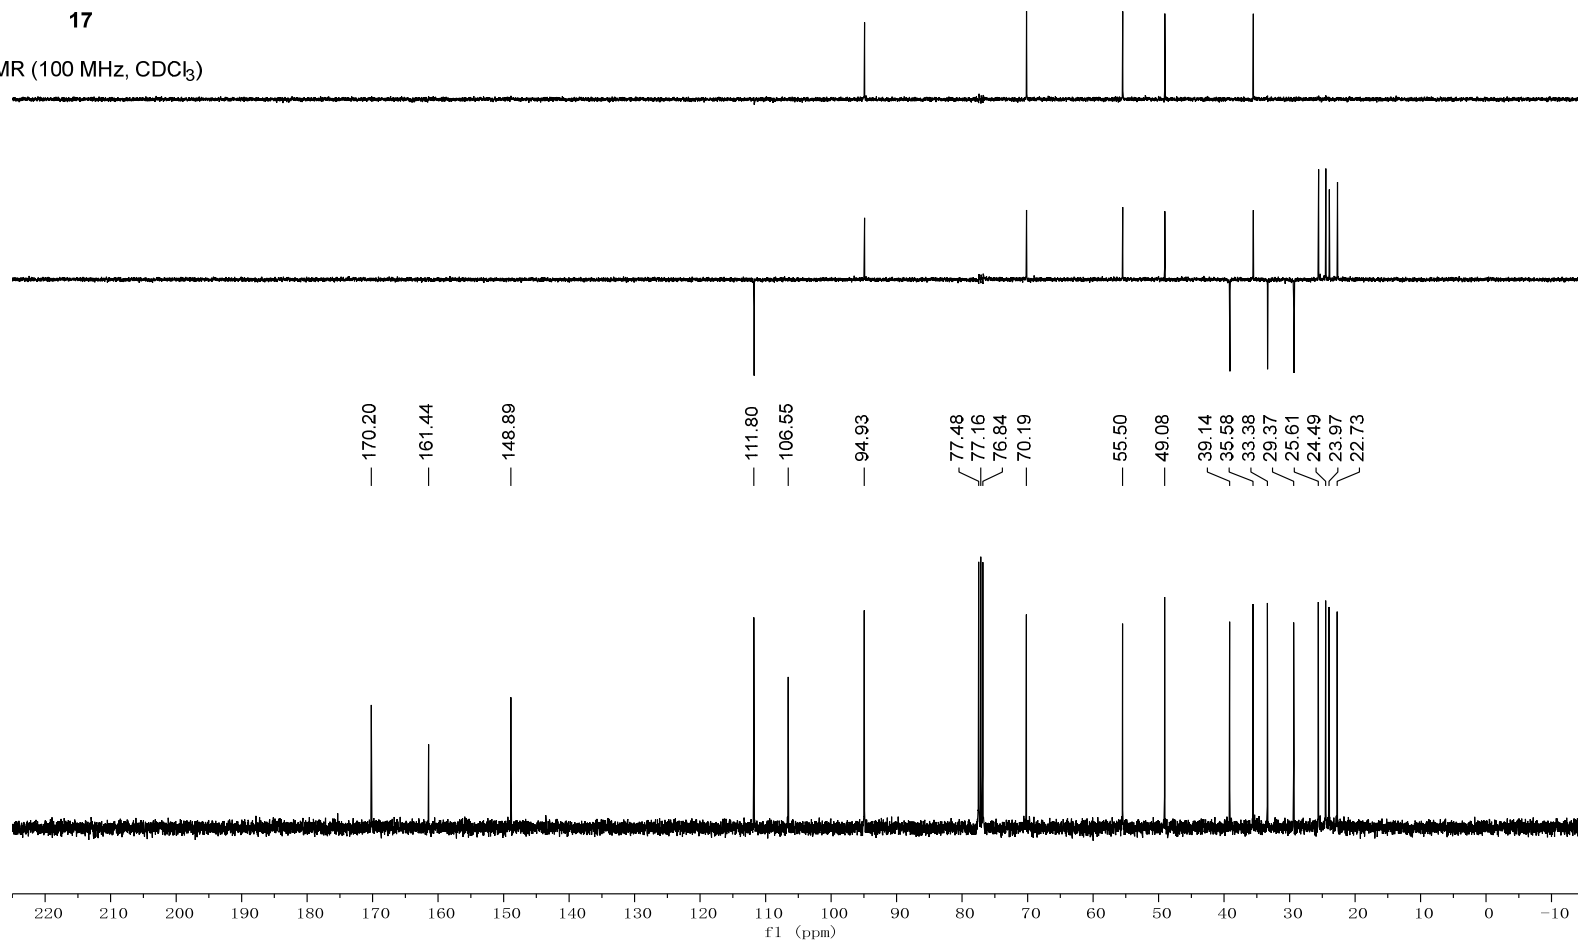

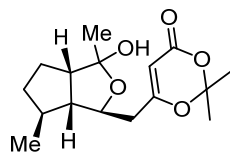

**18**

$^1\text{H}$  NMR (400 MHz,  $\text{CDCl}_3$ )

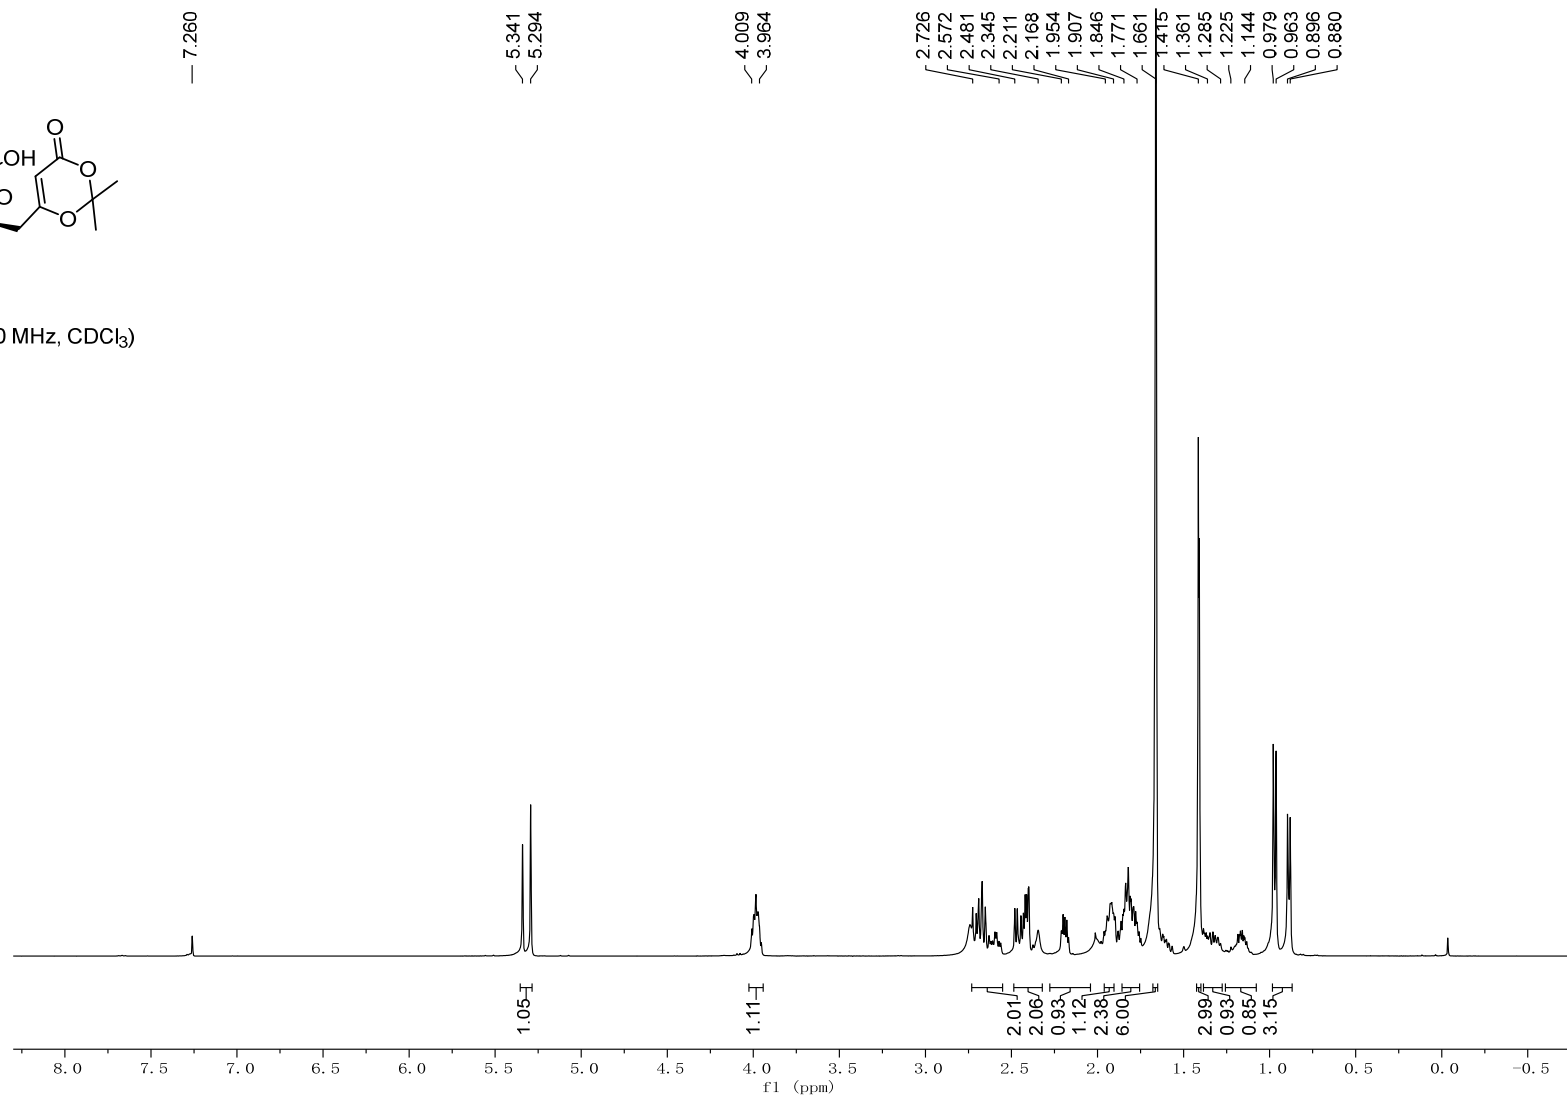

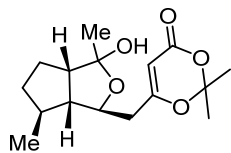

**18**

$^{13}\text{C}$  NMR (100 MHz,  $\text{CDCl}_3$ )

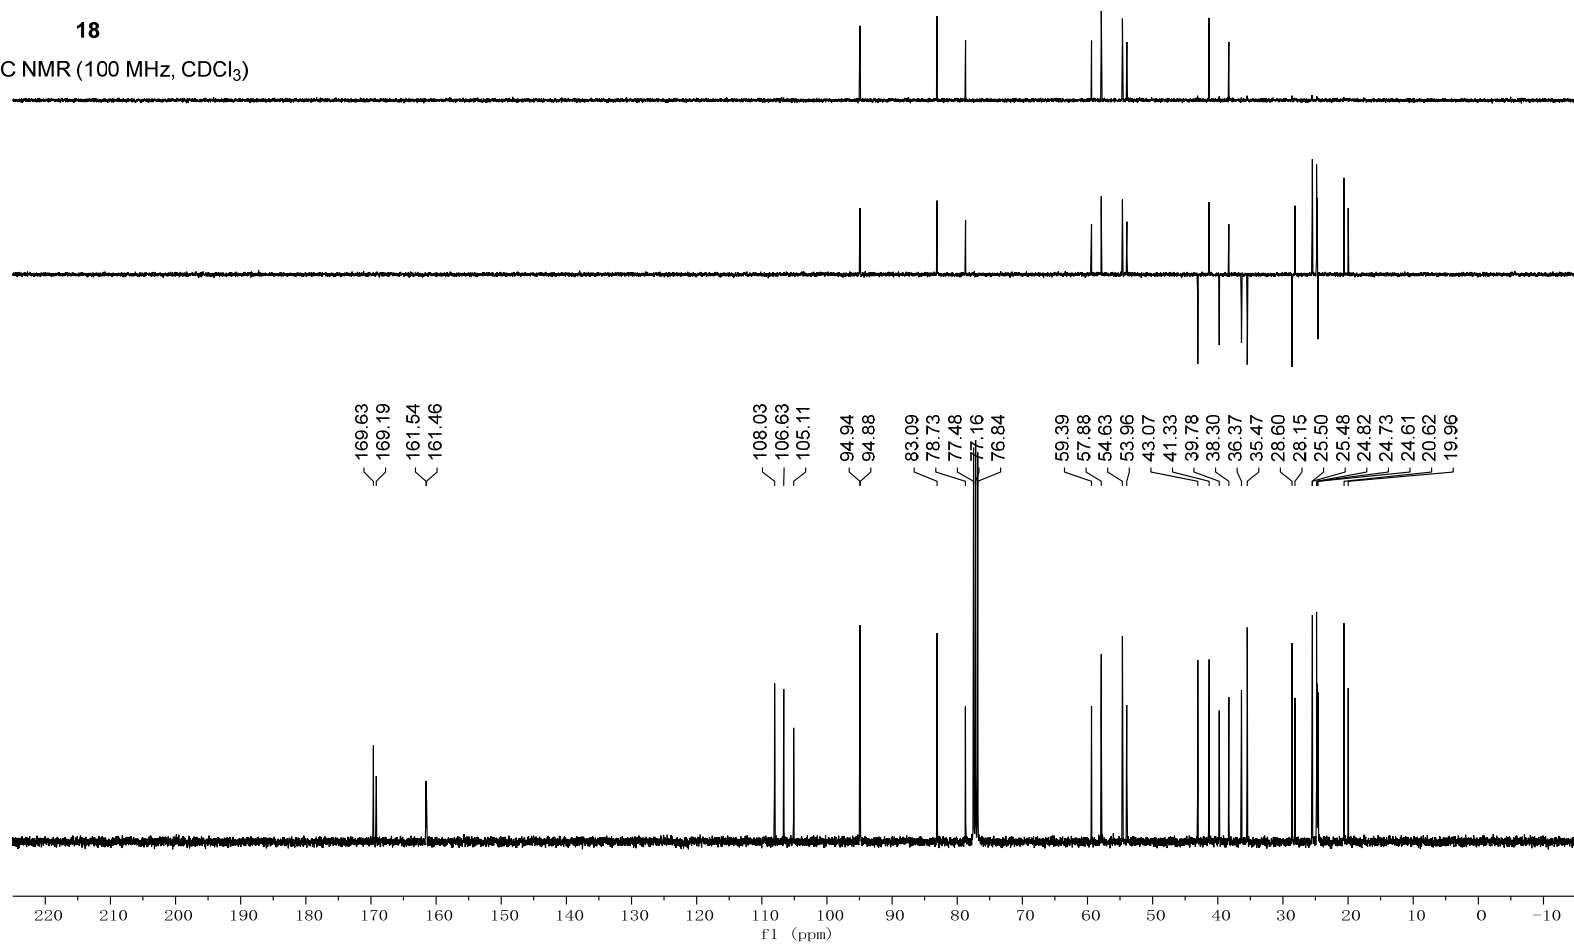

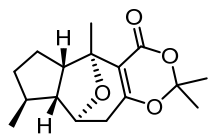

**19**

$^1\text{H}$  NMR (600 MHz,  $\text{CDCl}_3$ )

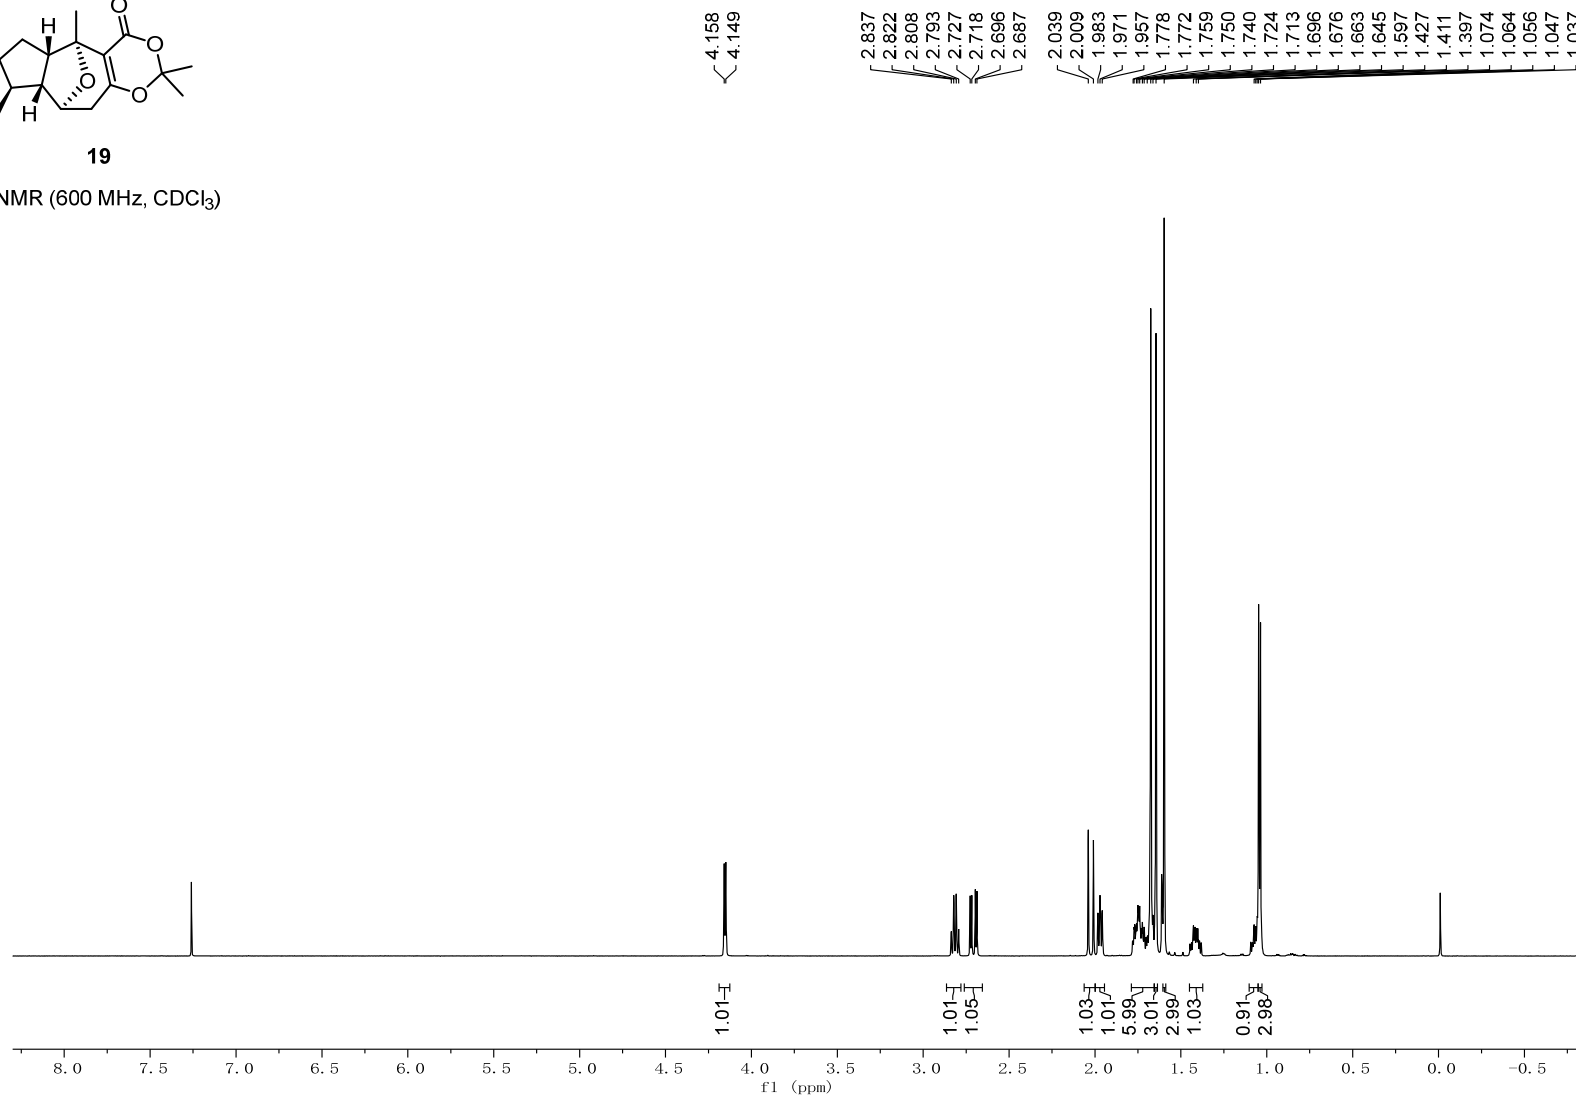

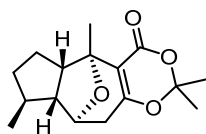

**19**

$^{13}\text{C}$  NMR (150 MHz,  $\text{CDCl}_3$ )

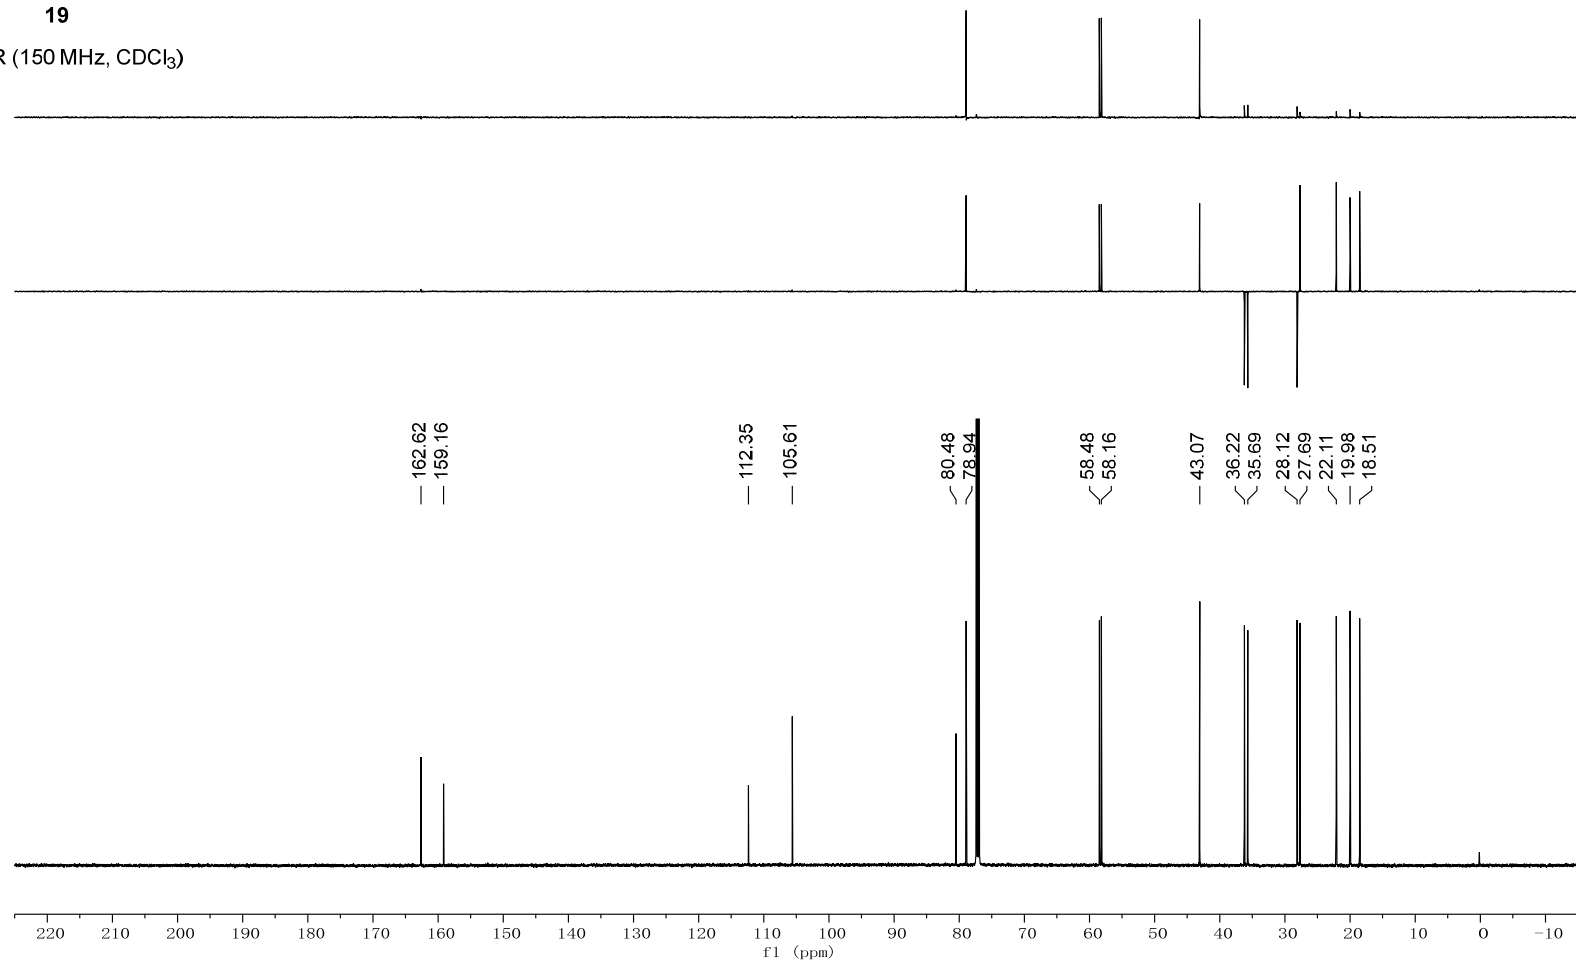

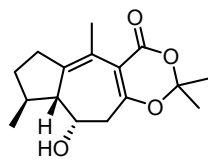

**20**

$^1\text{H}$  NMR (400 MHz,  $\text{CDCl}_3$ )

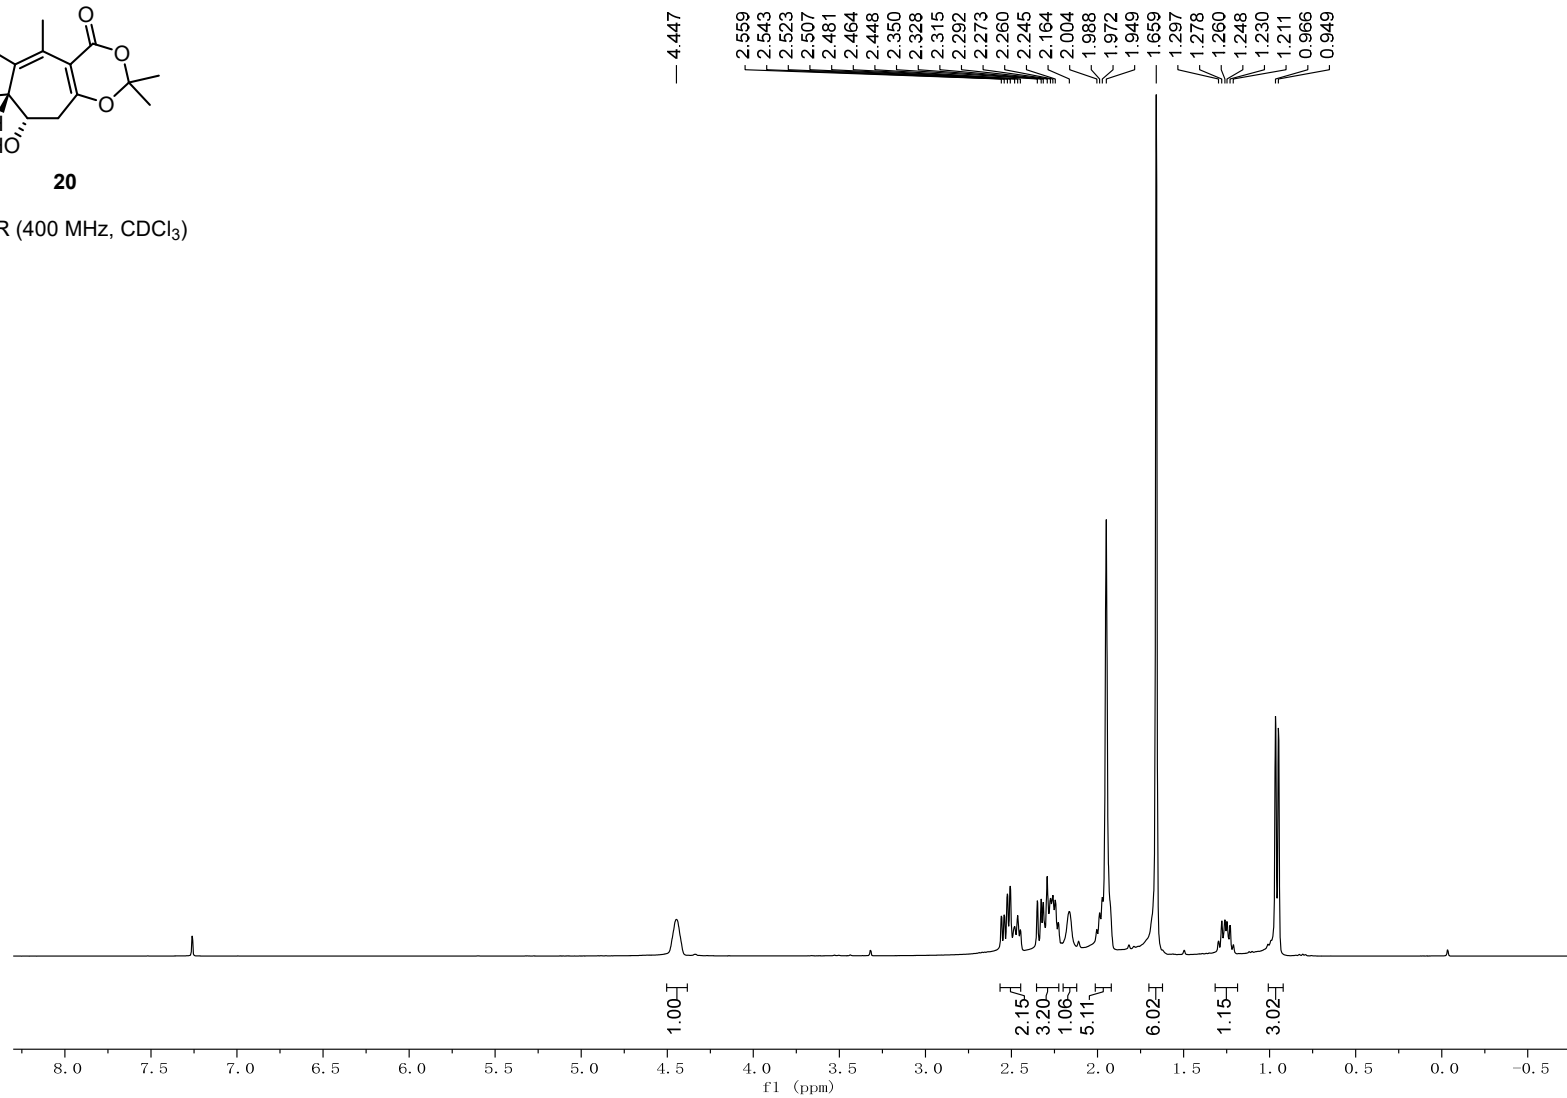

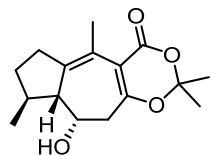

**20**

$^{13}\text{C}$  NMR (100 MHz,  $\text{CDCl}_3$ )

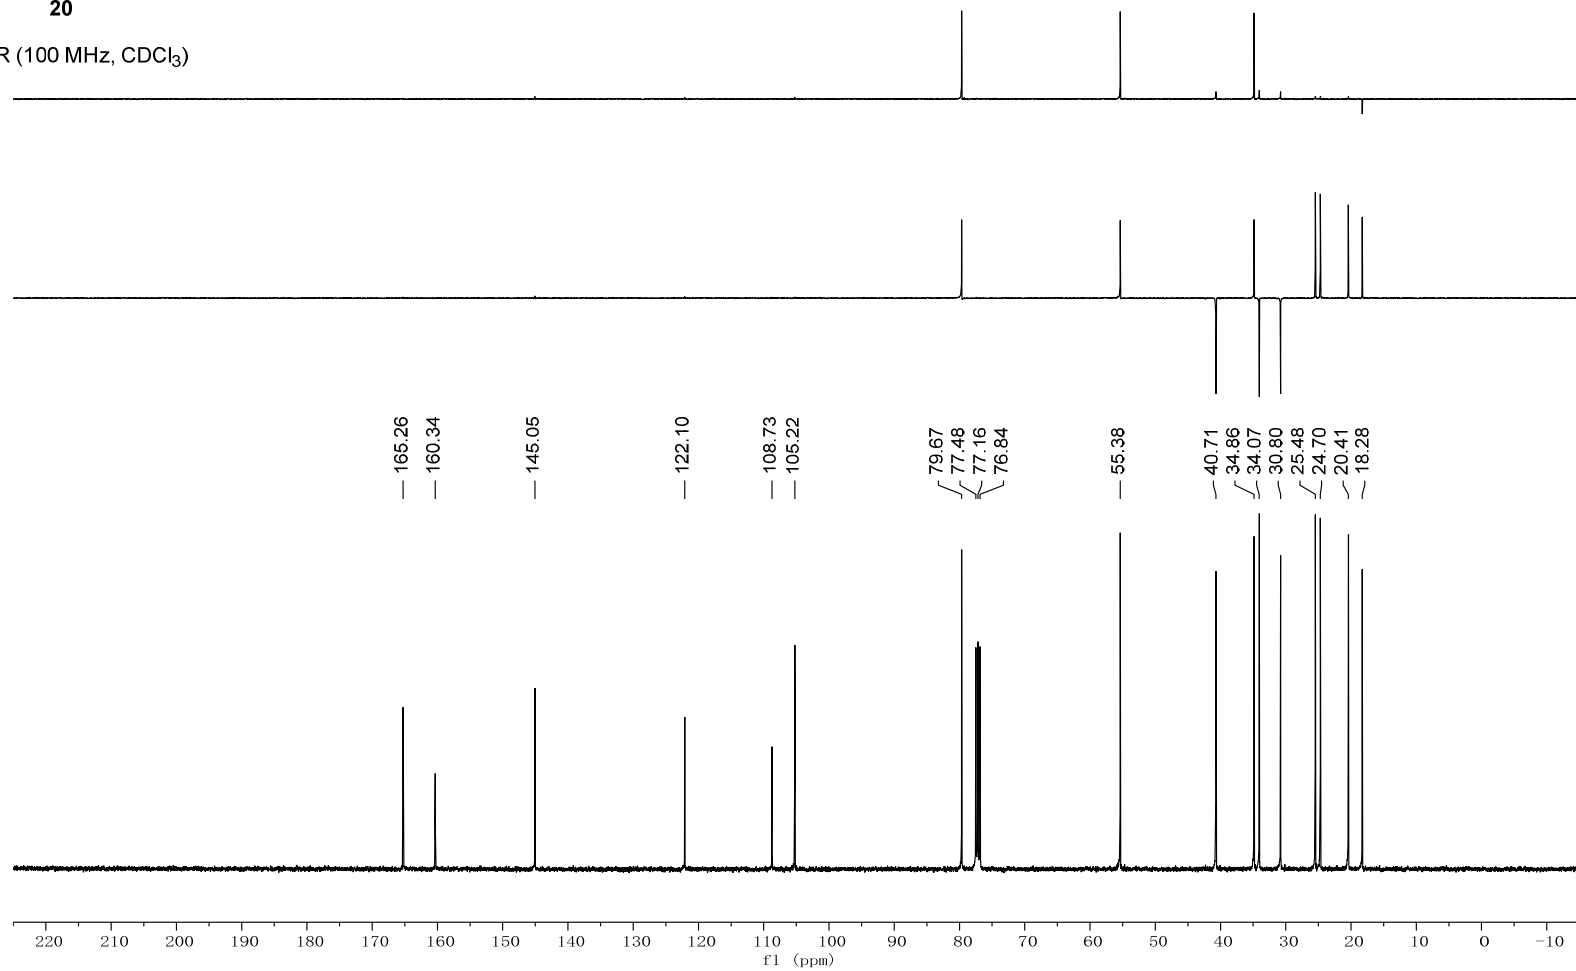

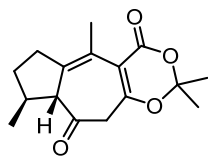

**9**

$^1\text{H}$  NMR (600 MHz,  $\text{CDCl}_3$ )

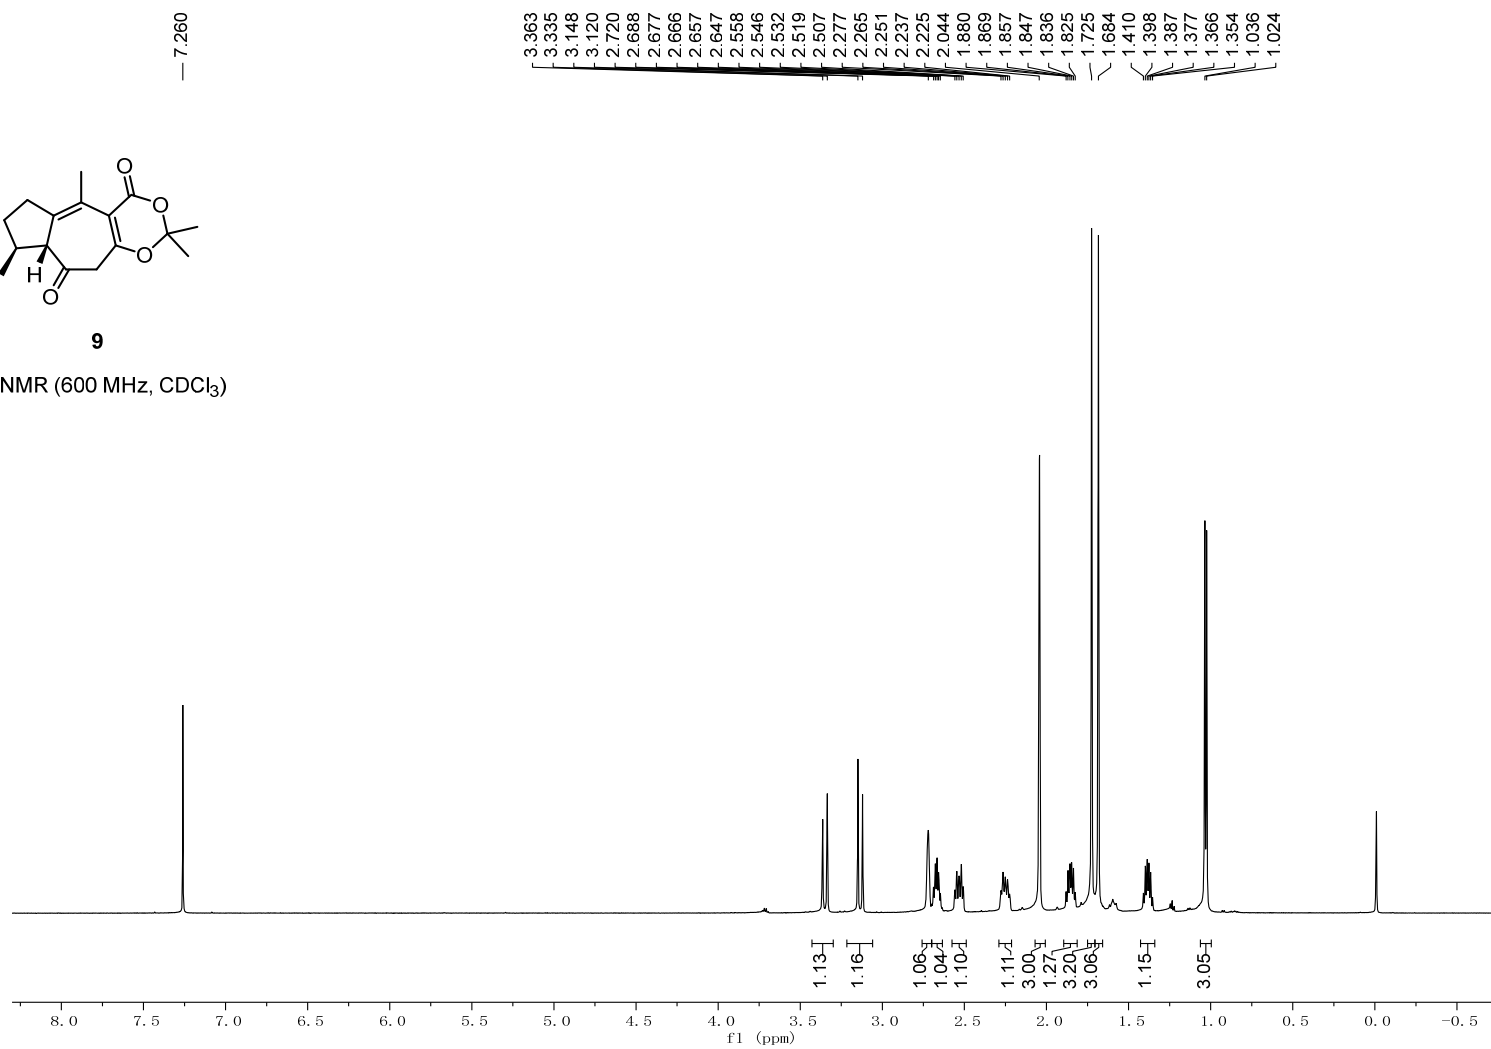

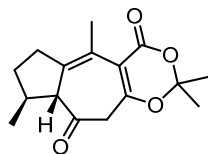

9

$^{13}\text{C}$  NMR (150 MHz,  $\text{CDCl}_3$ )

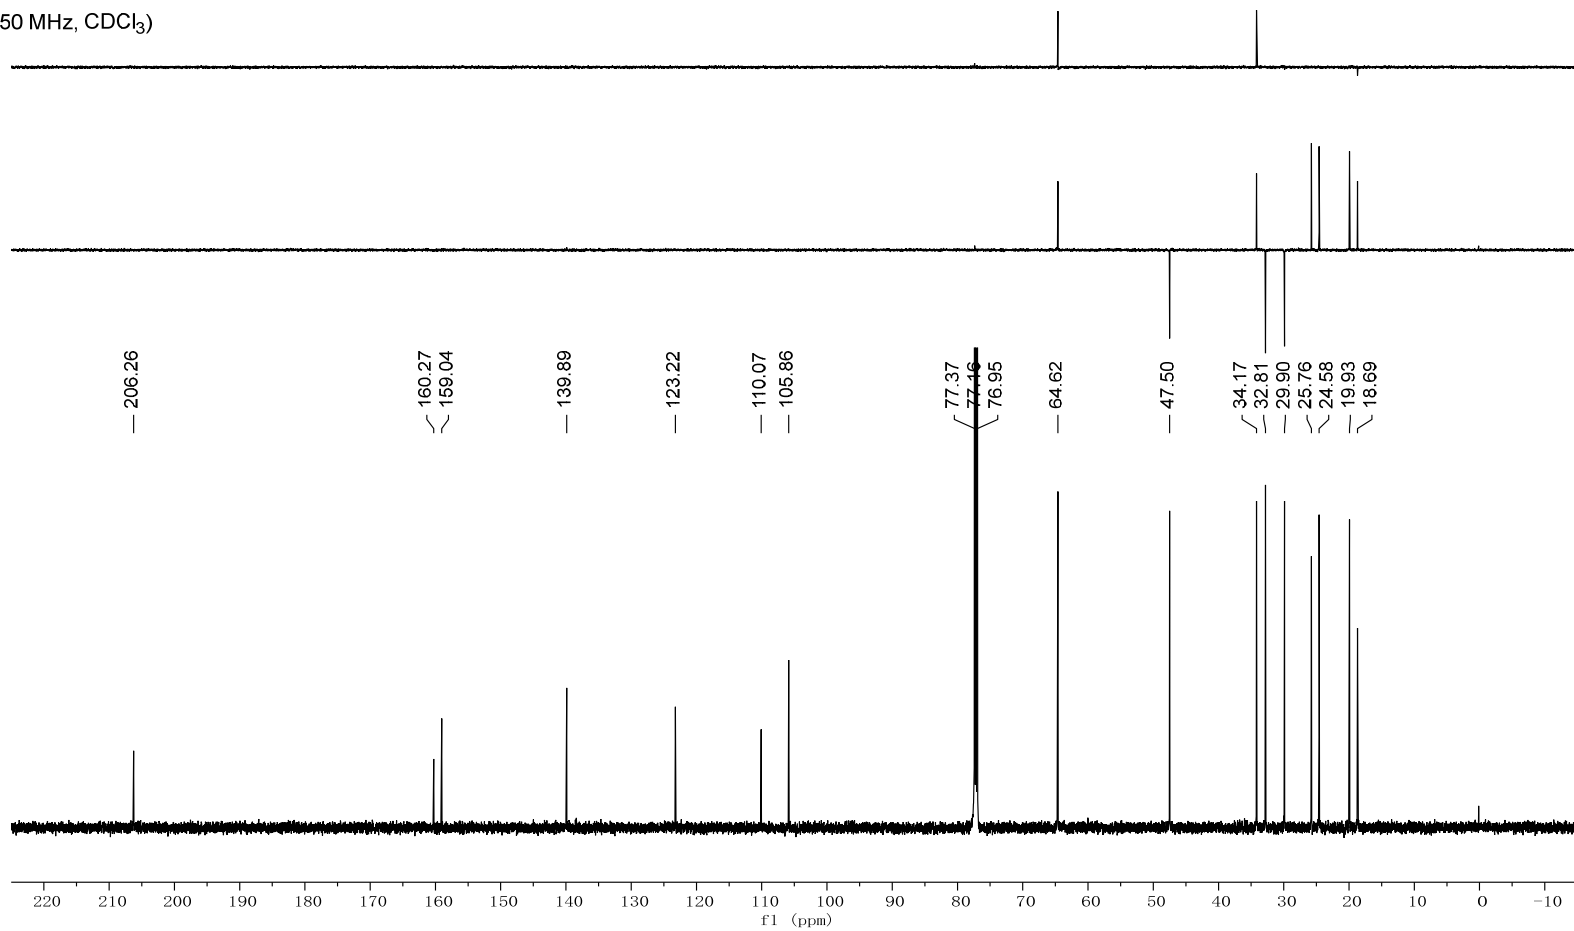

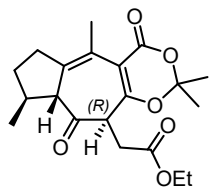

**S1**

$^1\text{H}$  NMR (600 MHz,  $\text{CDCl}_3$ )

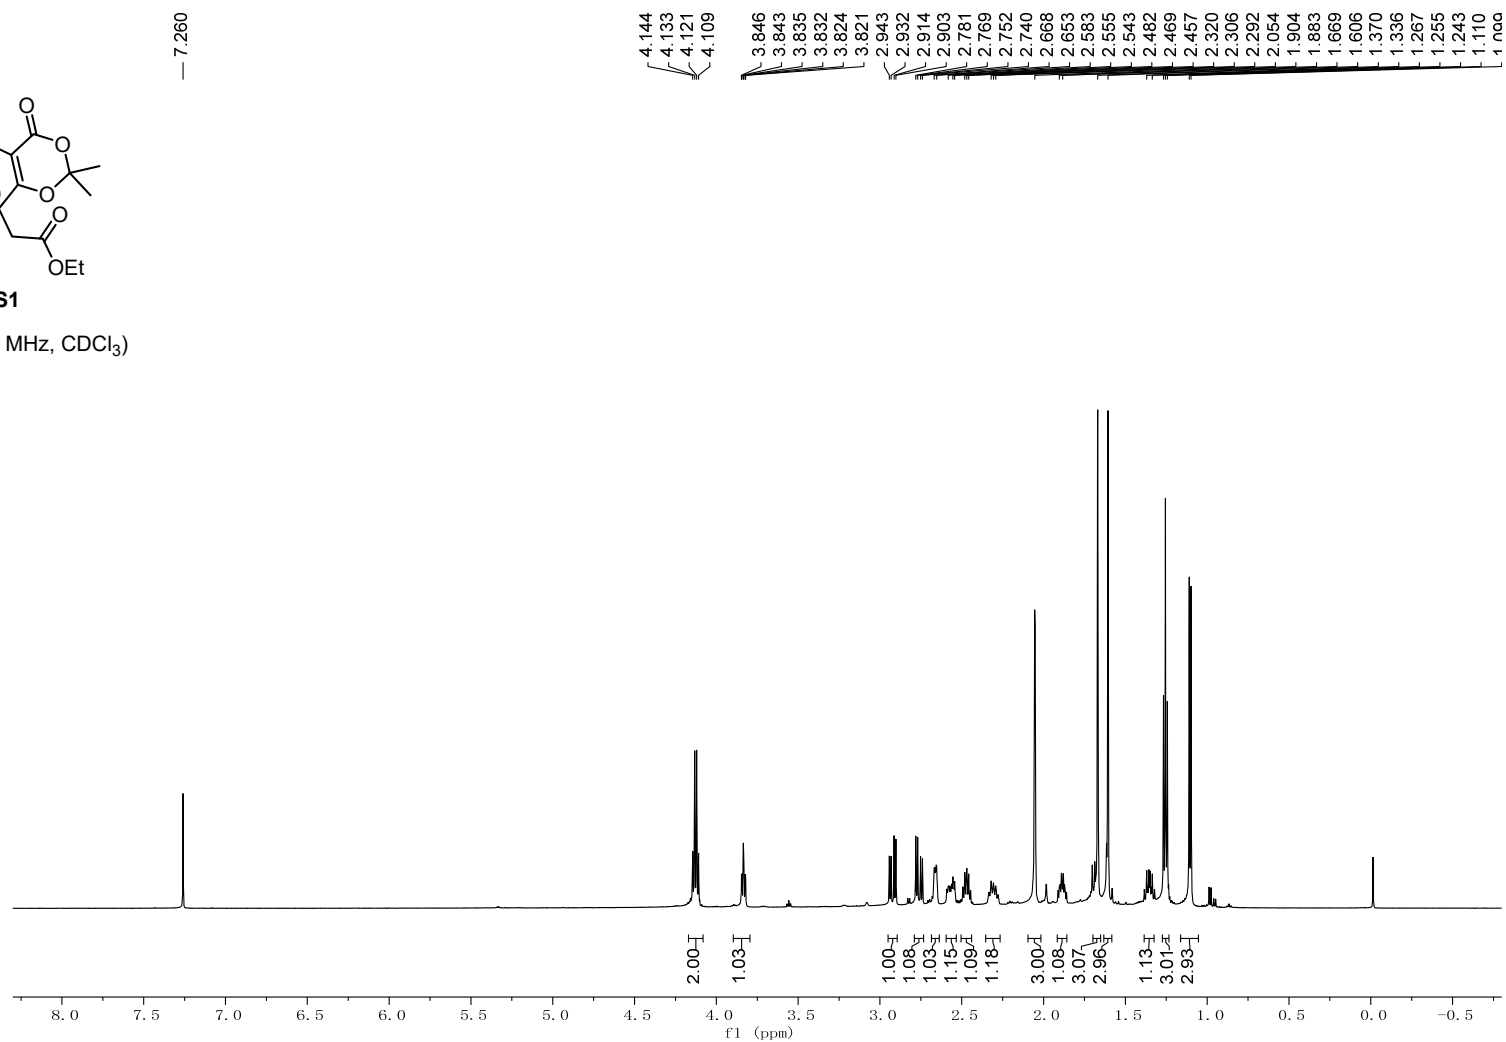

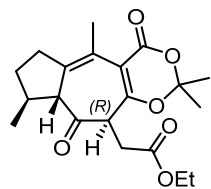

**S1**

$^{13}\text{C}$  NMR (150 MHz,  $\text{CDCl}_3$ )

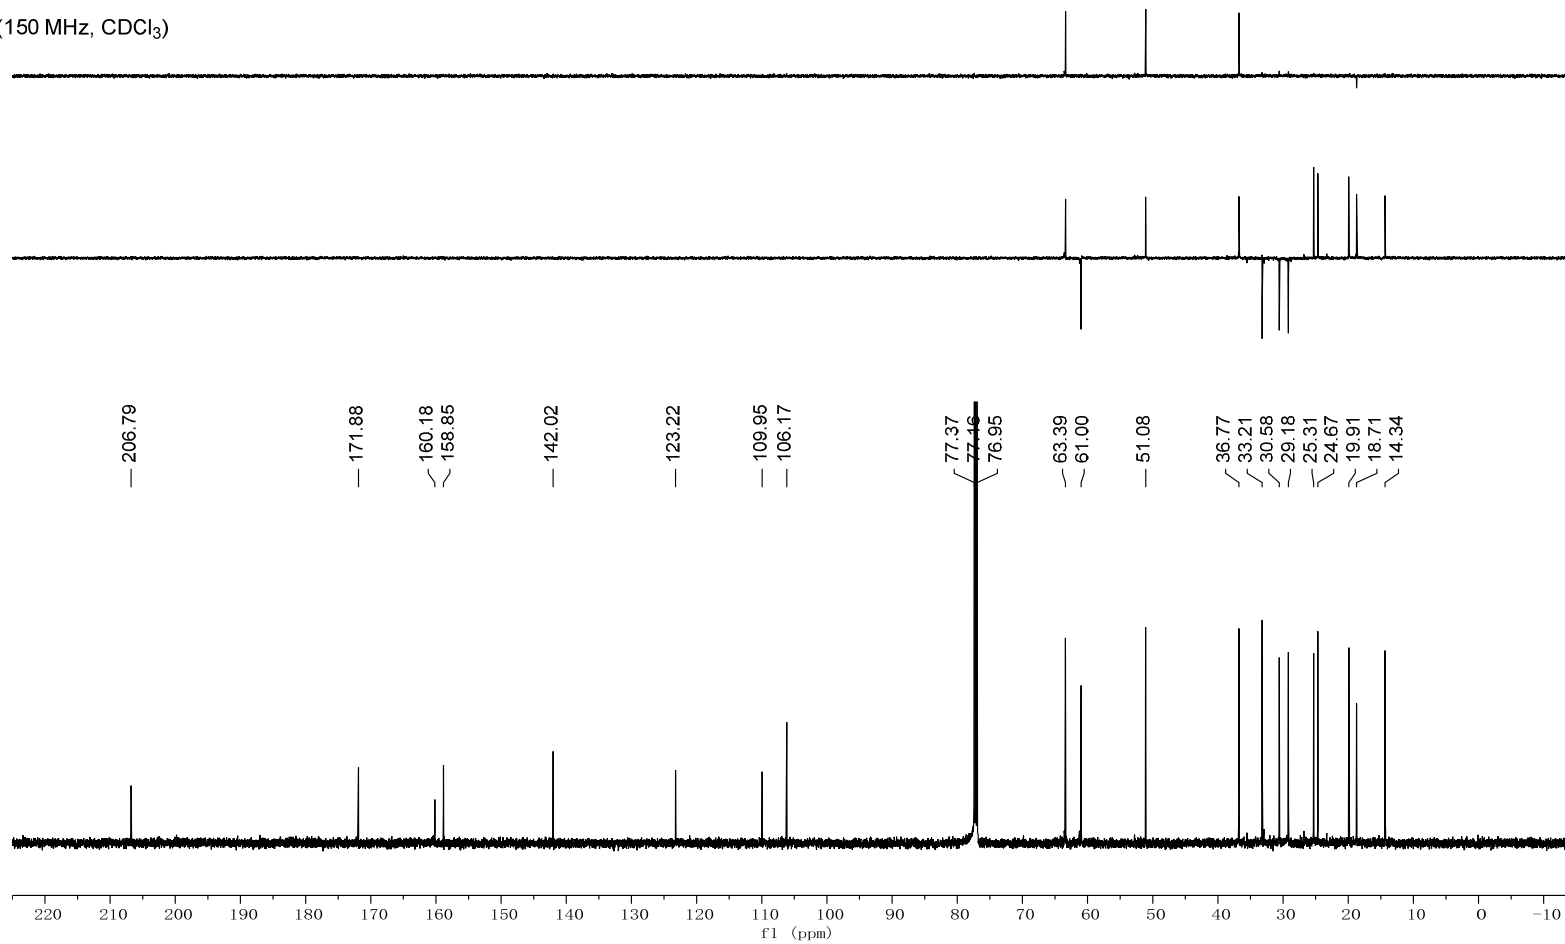

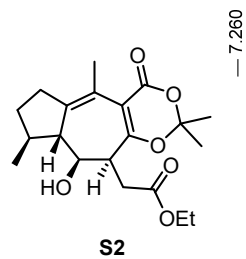

$^1\text{H}$  NMR (400 MHz,  $\text{CDCl}_3$ )

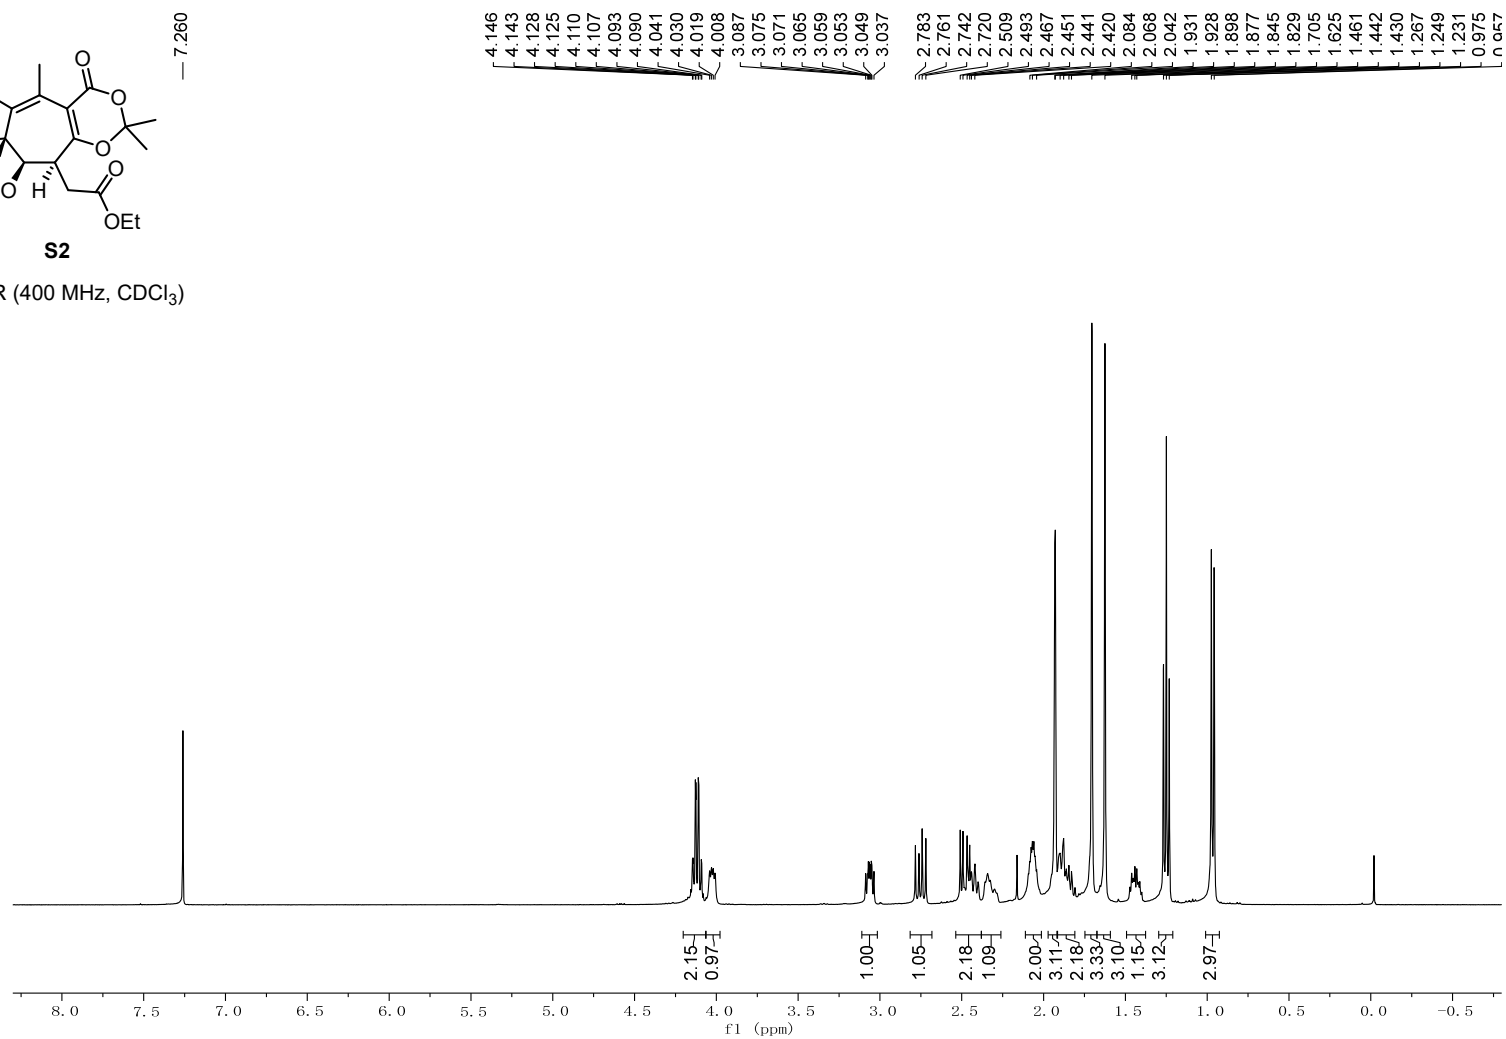

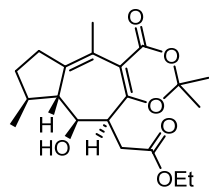

**S2**

$^{13}\text{C}$  NMR (100 MHz,  $\text{CDCl}_3$ )

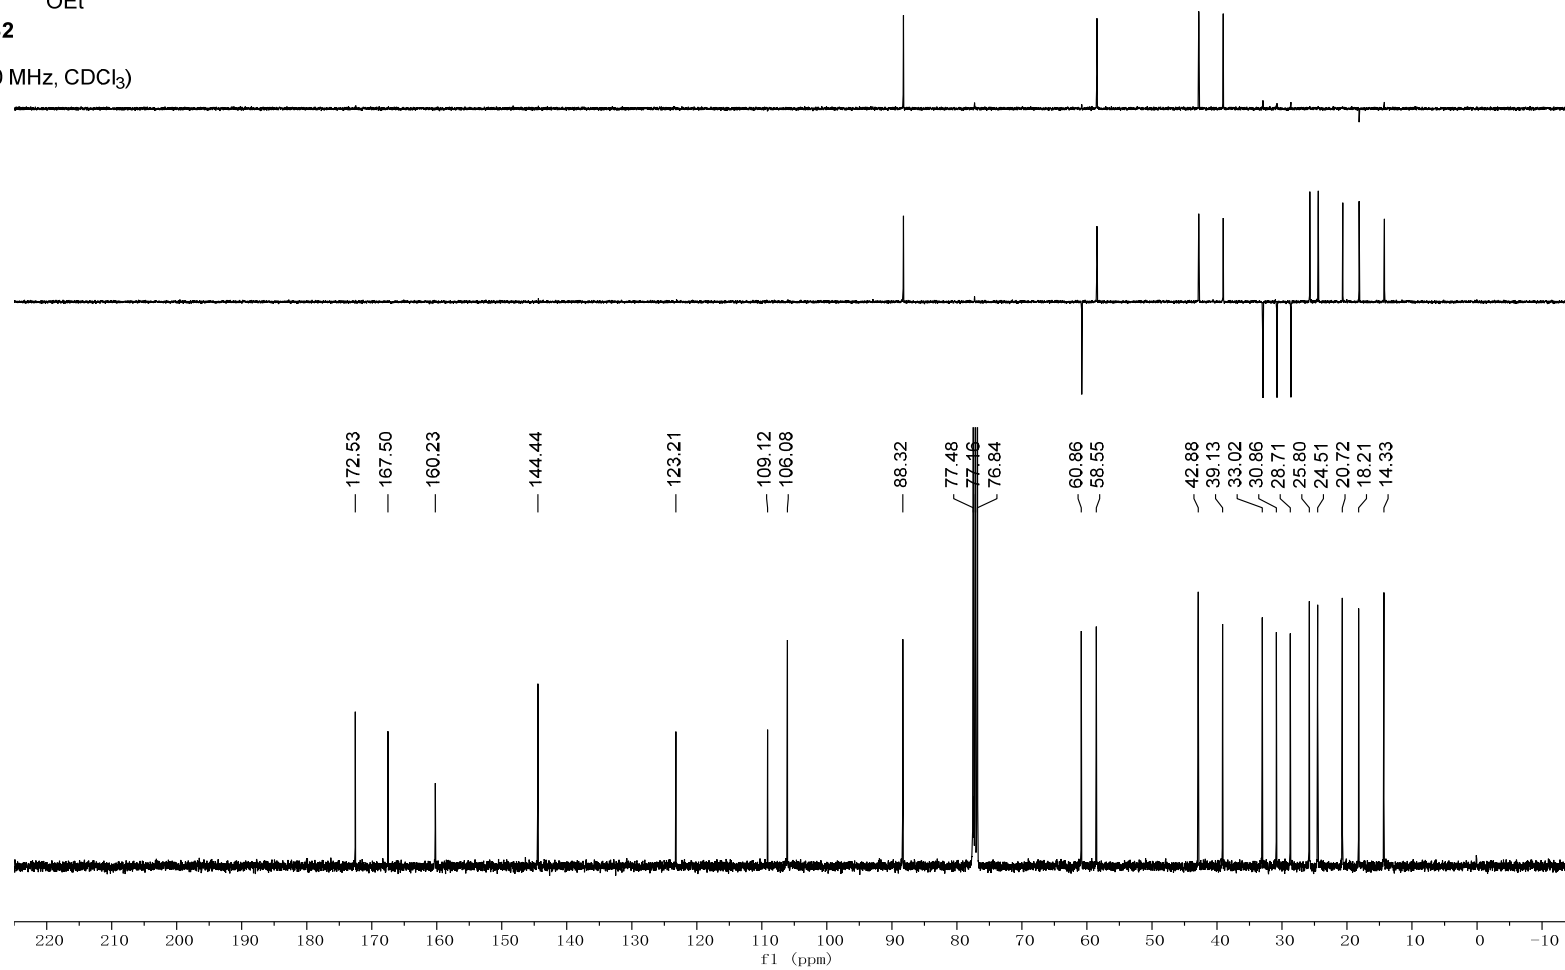

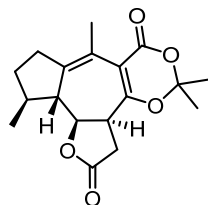

**22**

$^1\text{H}$  NMR (400 MHz,  $\text{CDCl}_3$ )

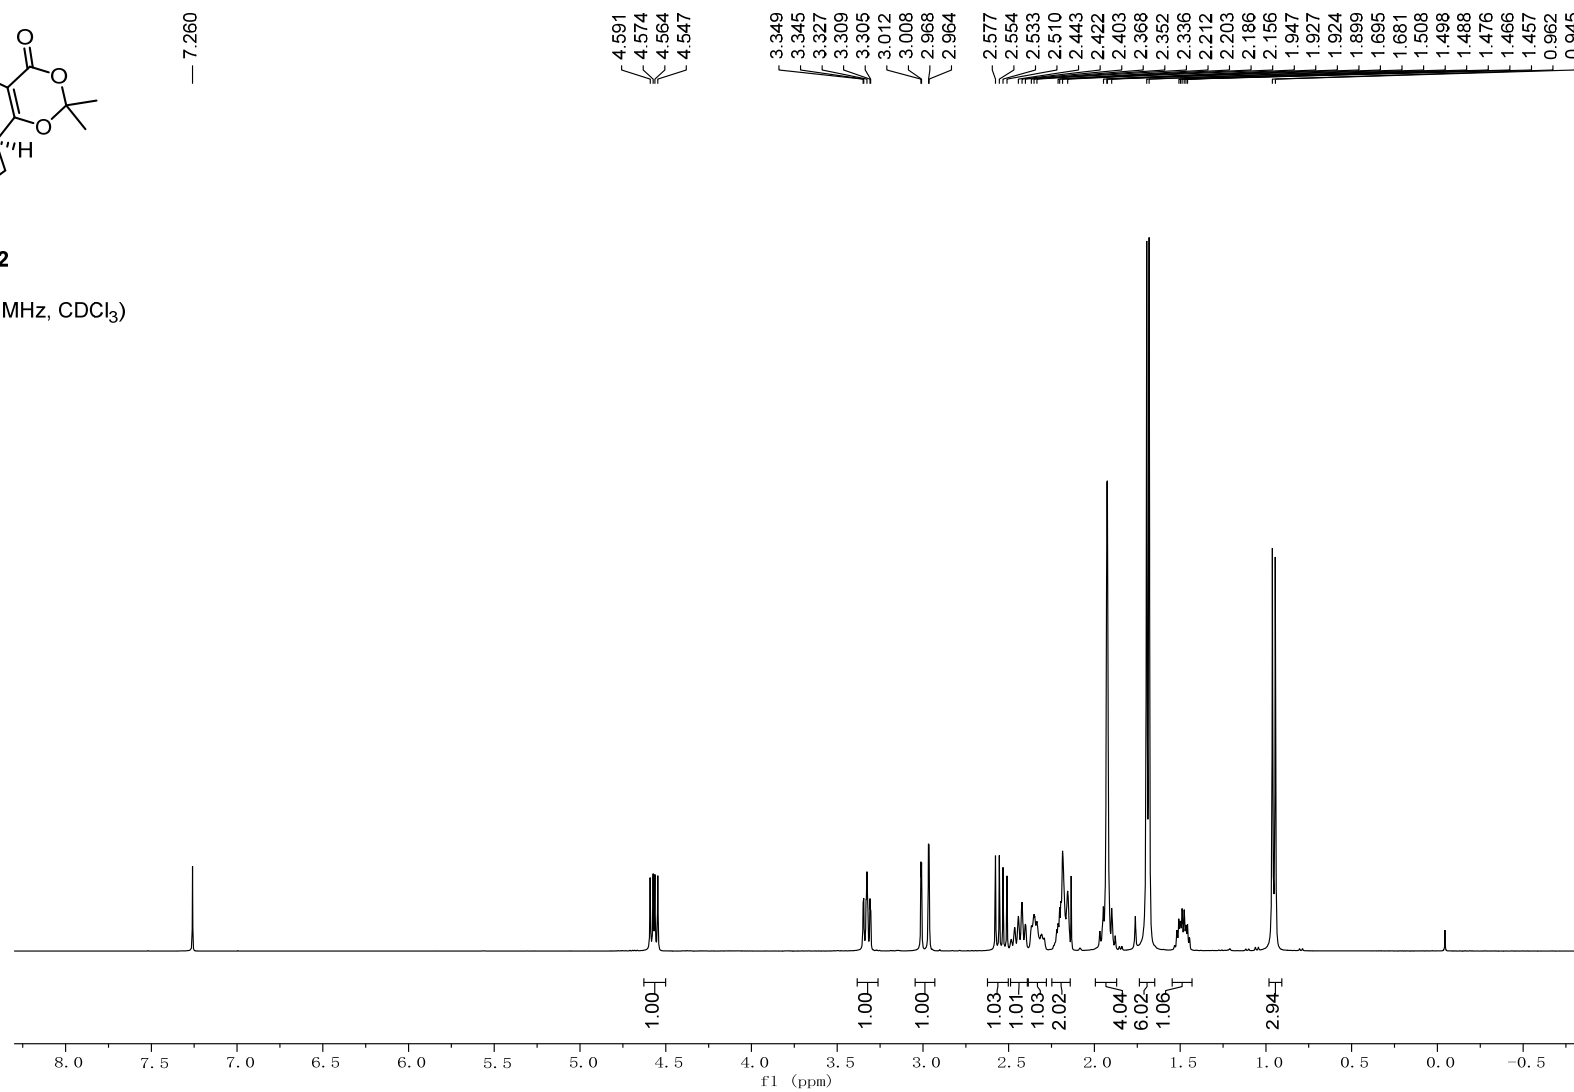

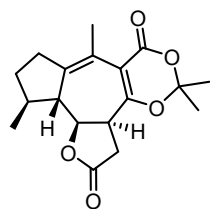

**22**

$^{13}\text{C}$  NMR (100 MHz,  $\text{CDCl}_3$ )

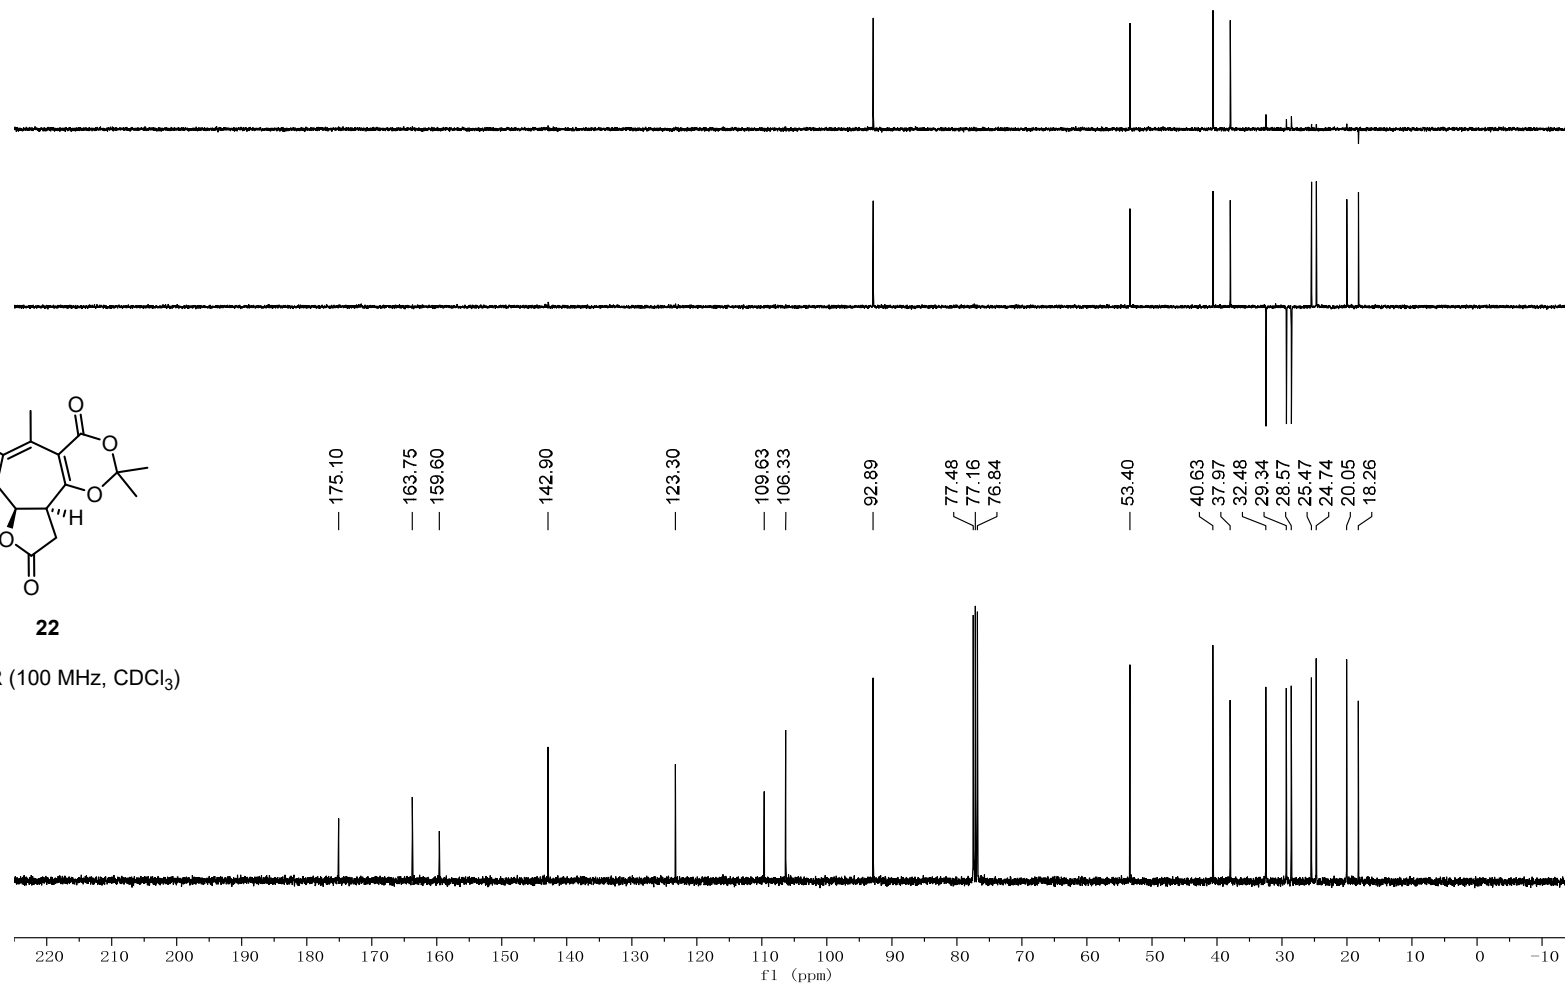

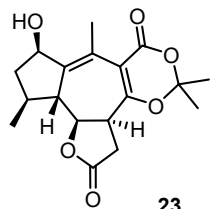

**23**

$^1\text{H}$  NMR (400 MHz,  $\text{CDCl}_3$ )

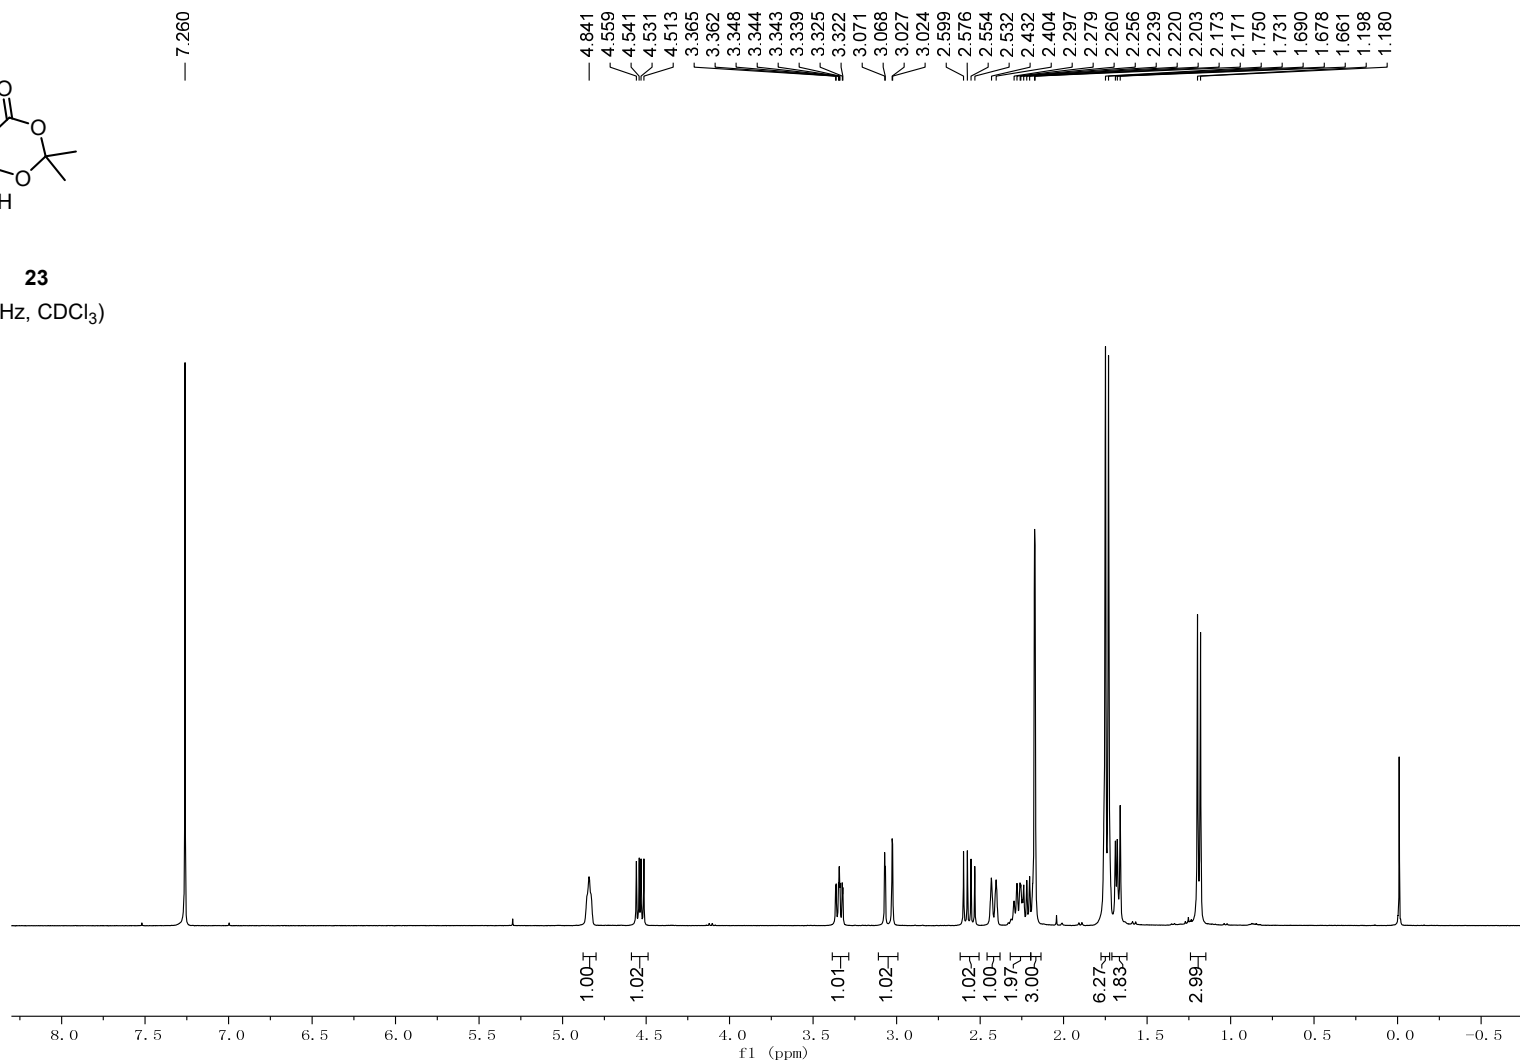

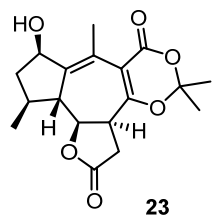

$^{13}\text{C}$  NMR (100 MHz,  $\text{CDCl}_3$ )

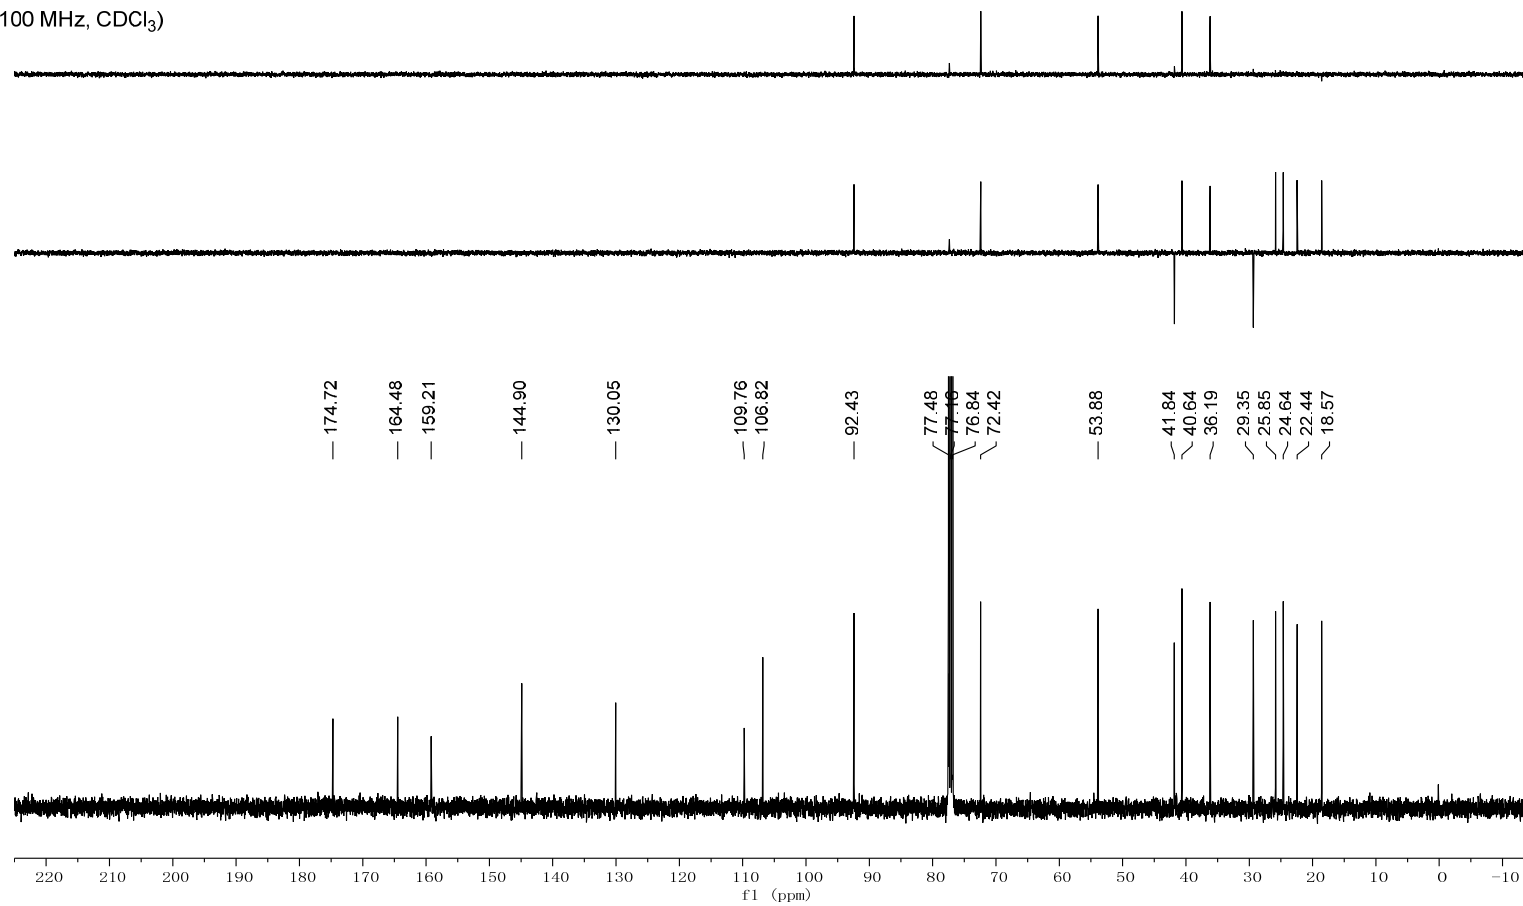

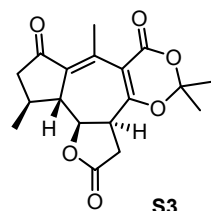

$^1\text{H}$  NMR (400 MHz,  $\text{CDCl}_3$ )

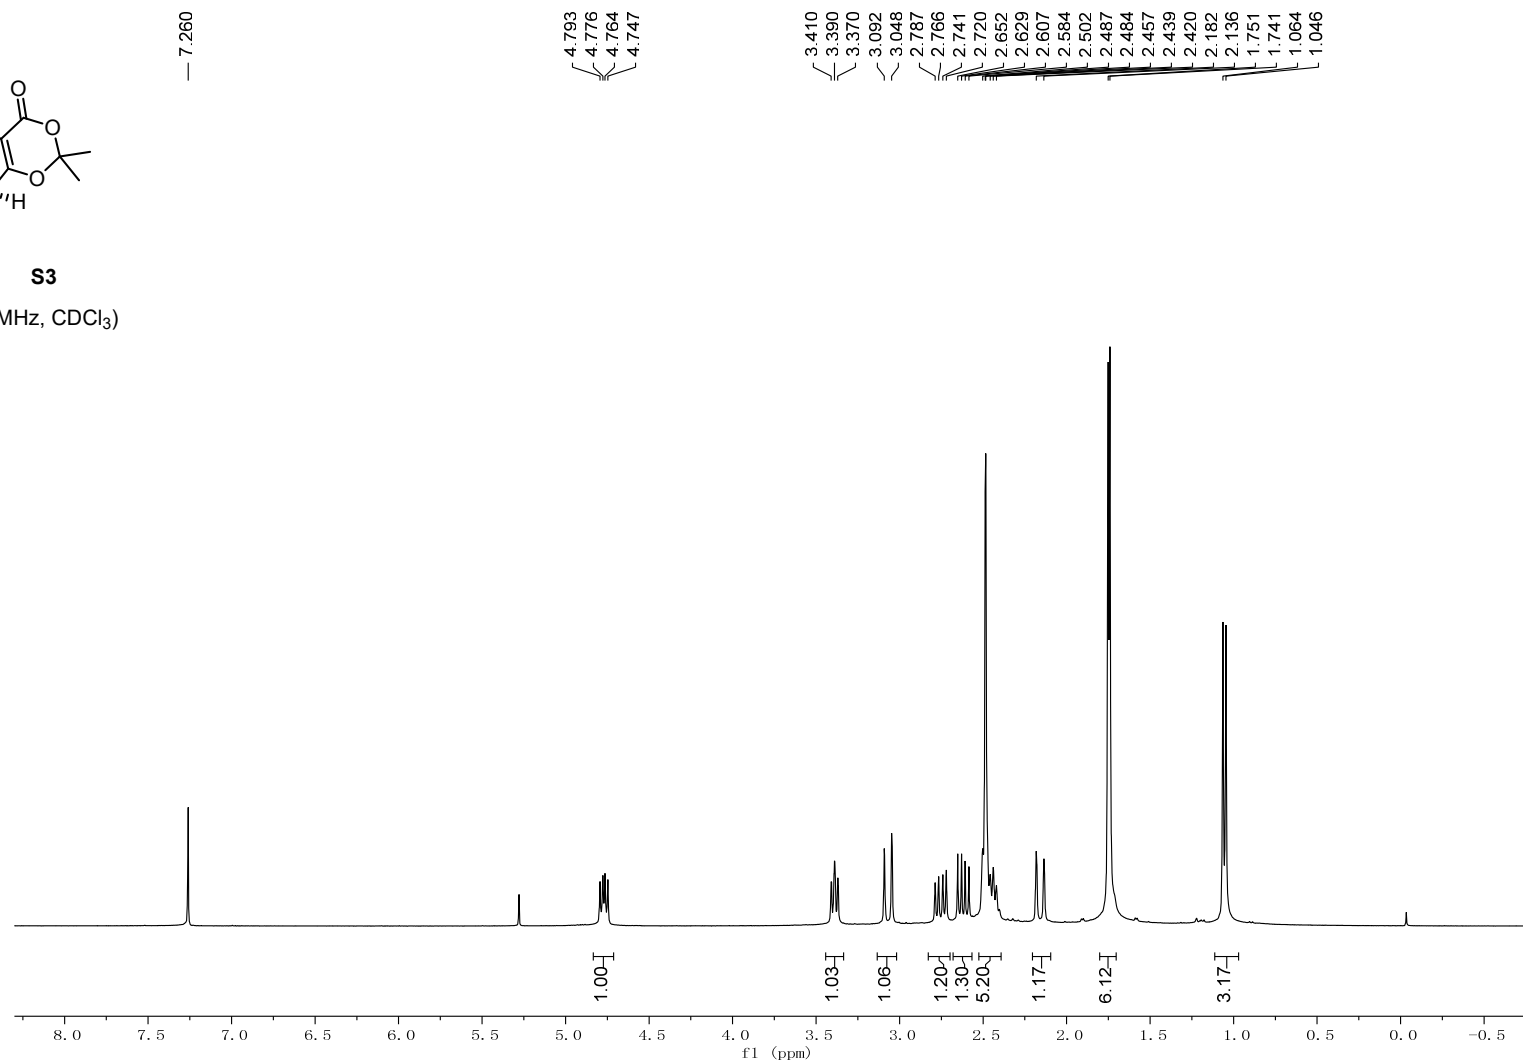

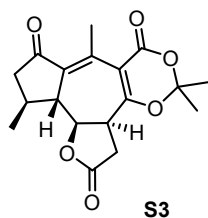

$^{13}\text{C}$  NMR (100 MHz,  $\text{CDCl}_3$ )

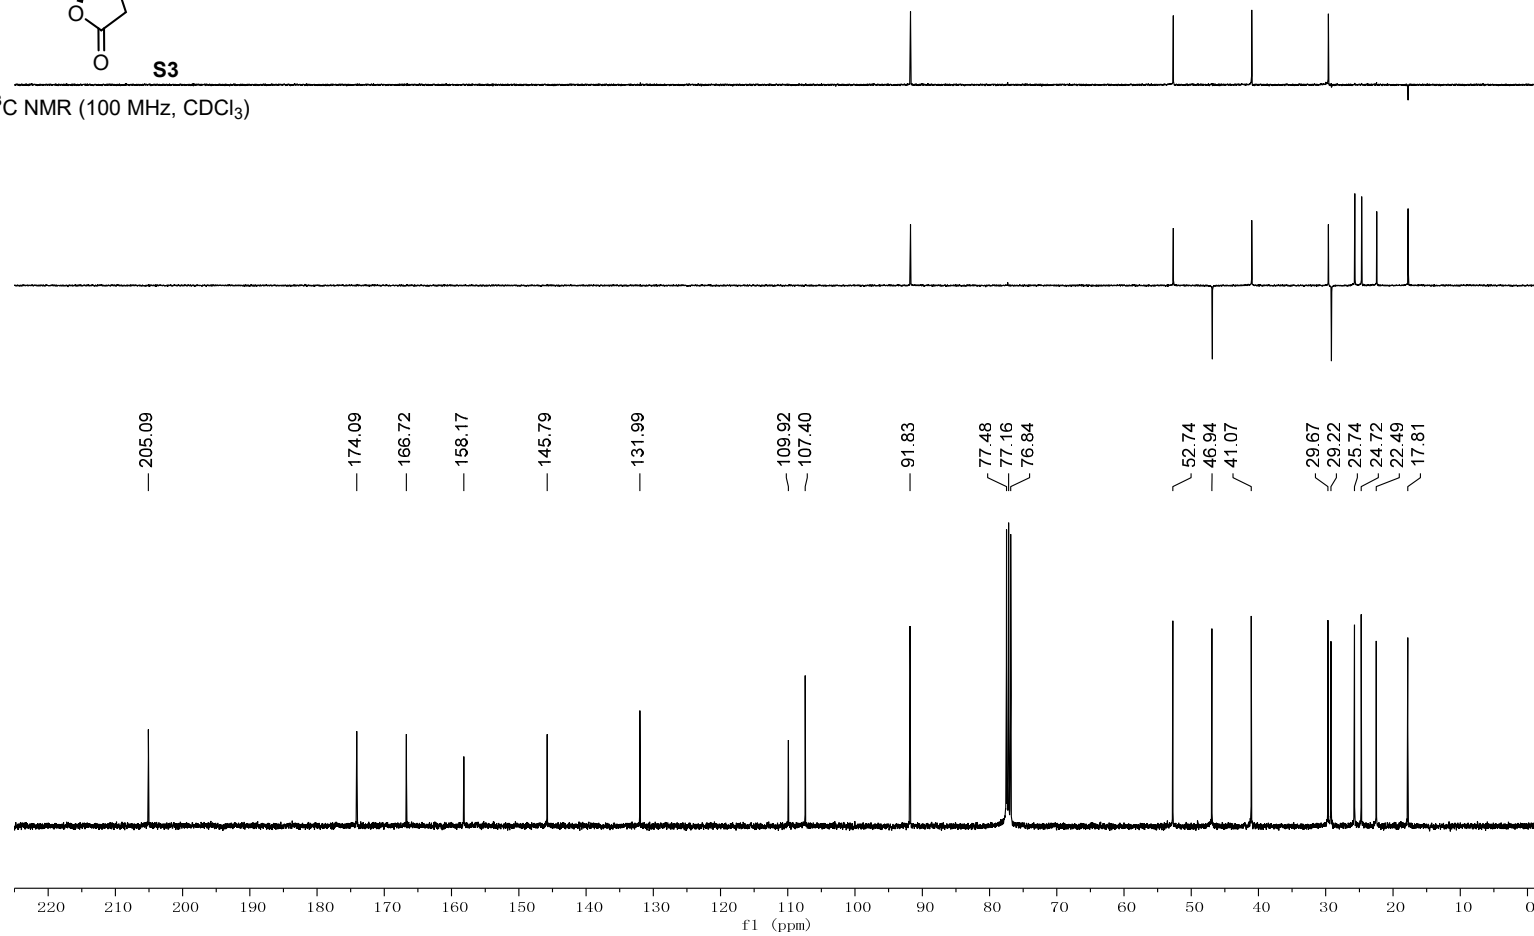

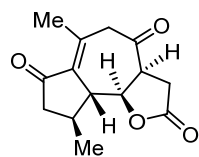

**24**

$^1\text{H}$  NMR (600 MHz,  $\text{CDCl}_3$ )

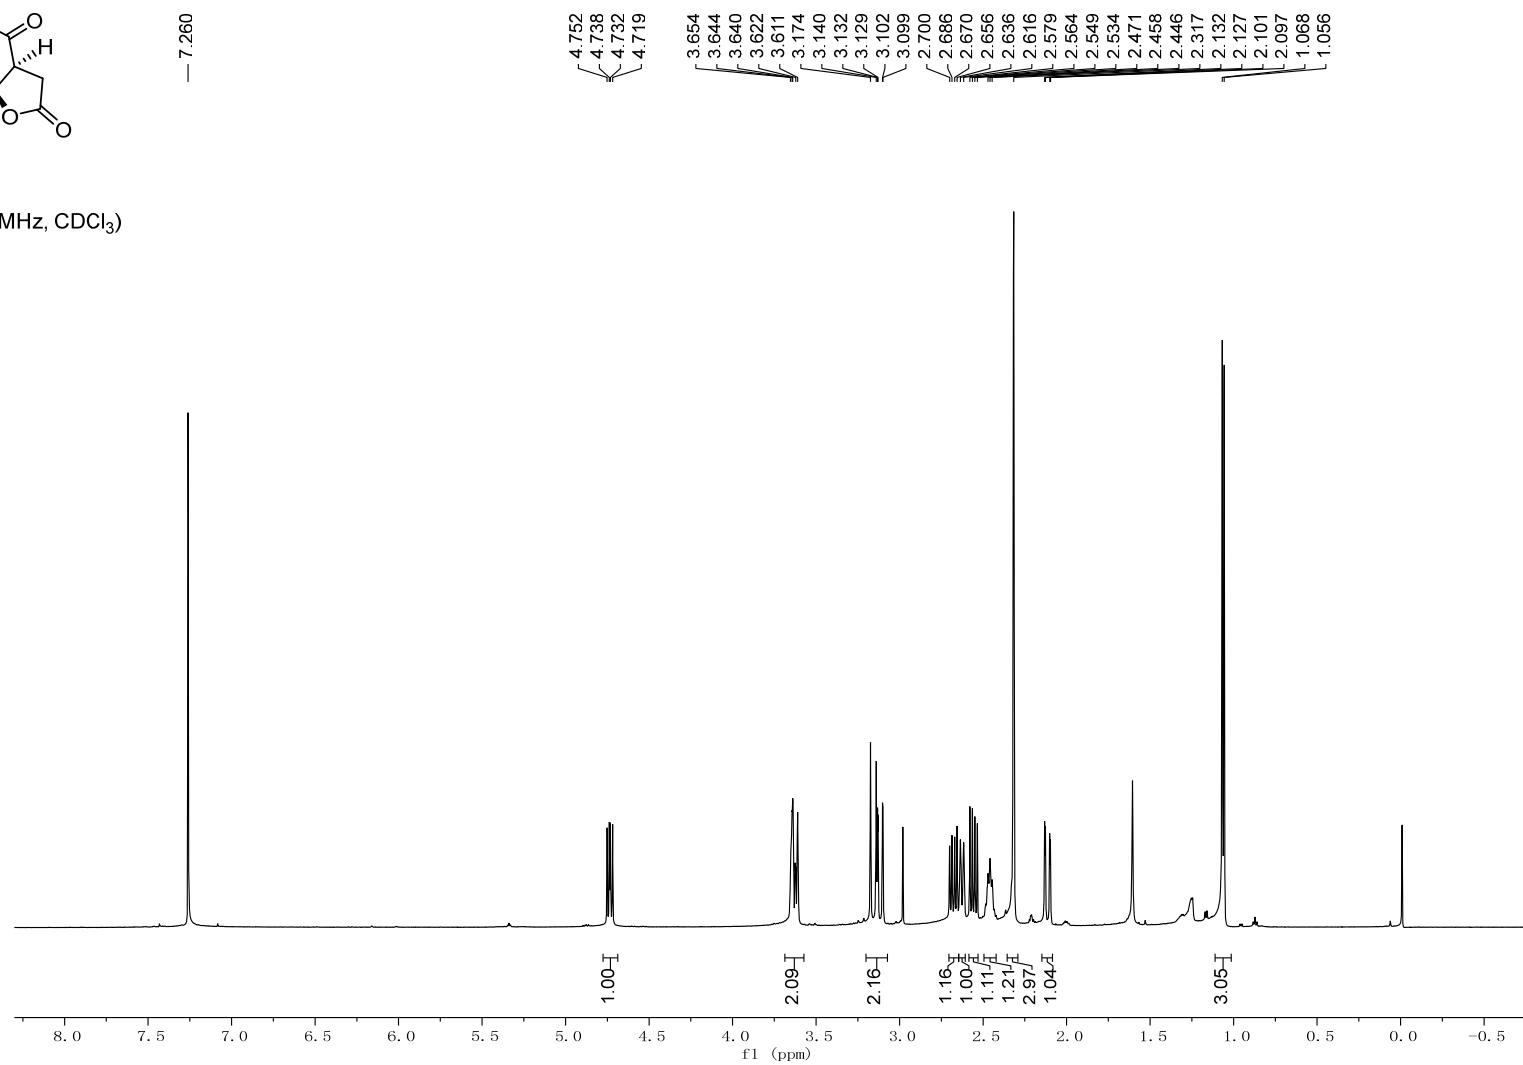

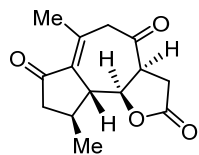

**24**

$^{13}\text{C}$  NMR (150 MHz,  $\text{CDCl}_3$ )

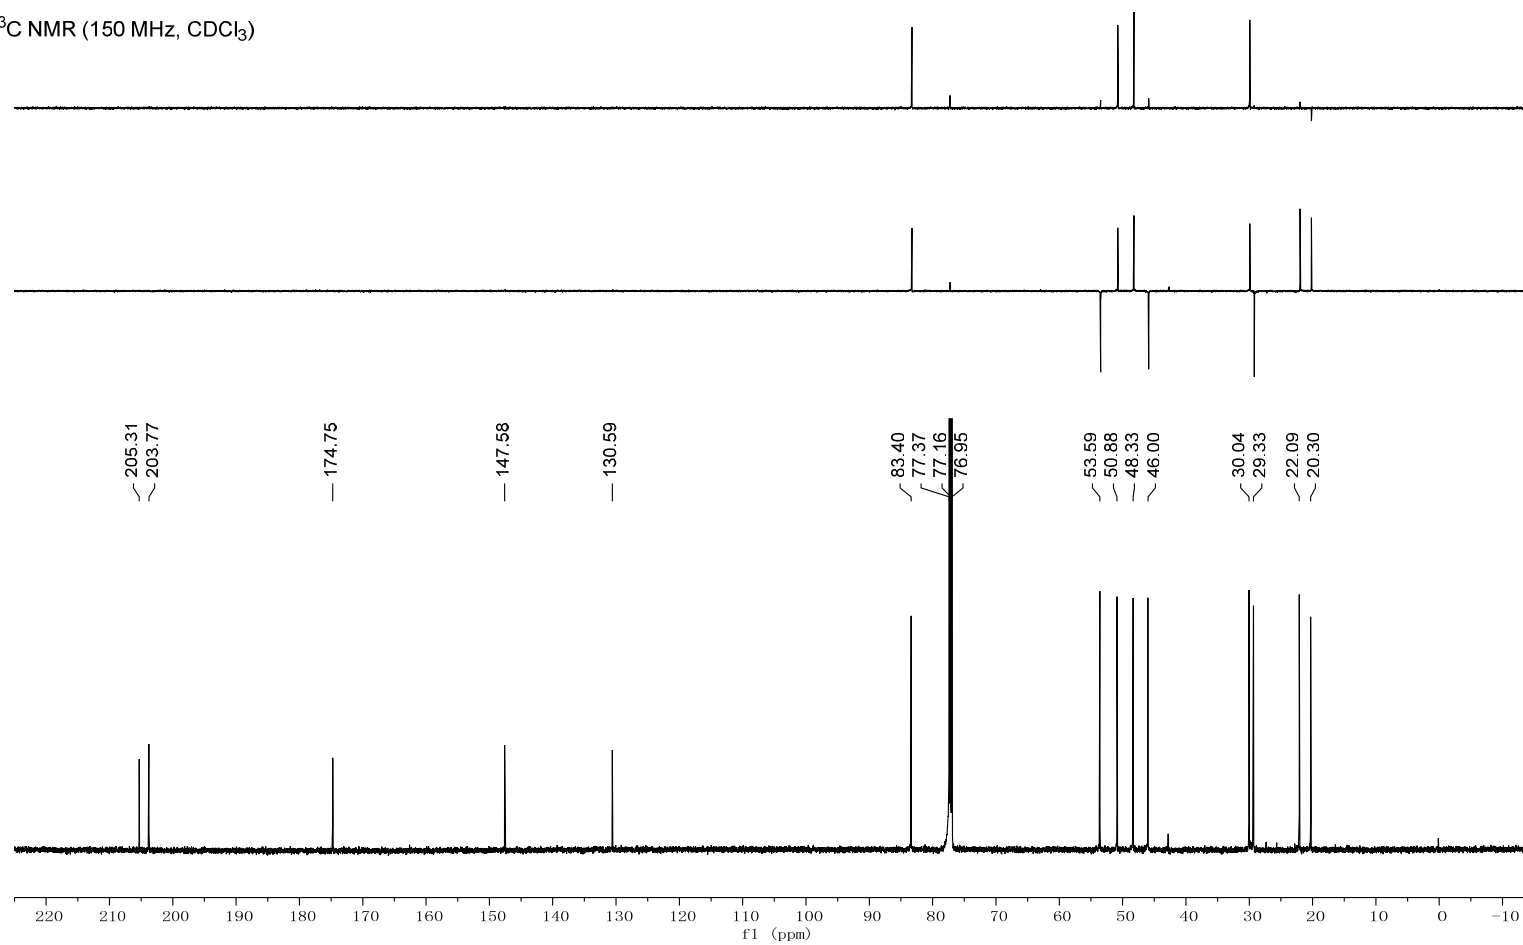

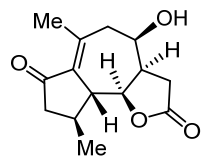

**25**

$^1\text{H}$  NMR (600 MHz,  $\text{CDCl}_3$ )

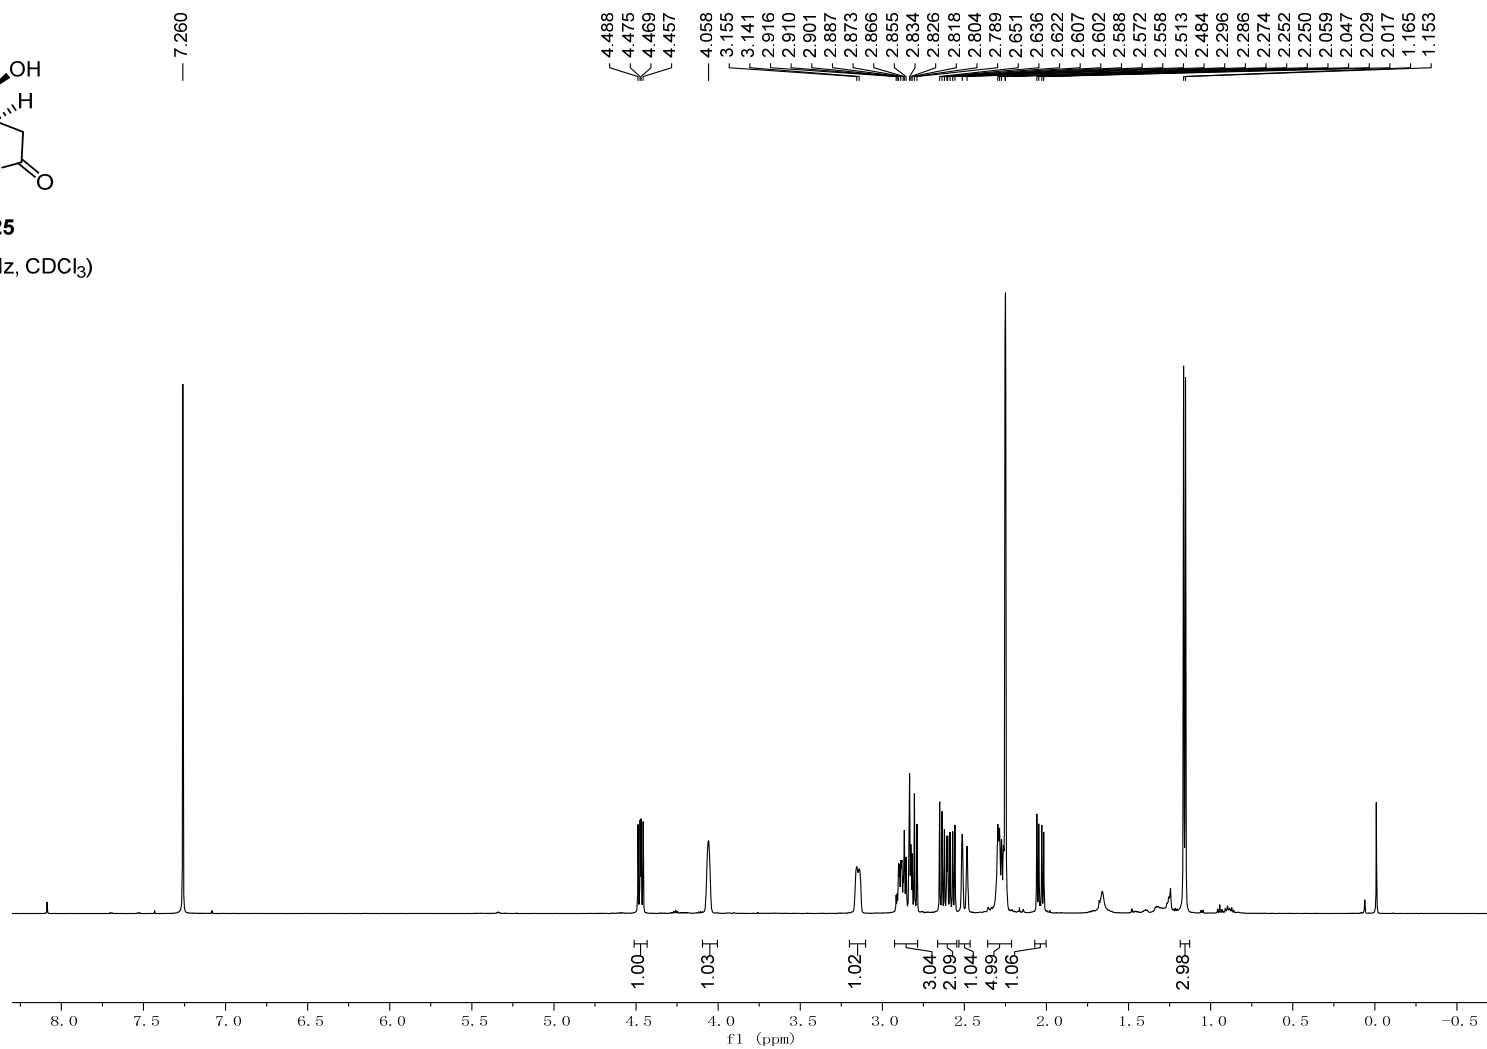

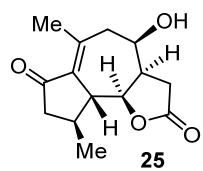

$^{13}\text{C}$  NMR (150 MHz,  $\text{CDCl}_3$ )

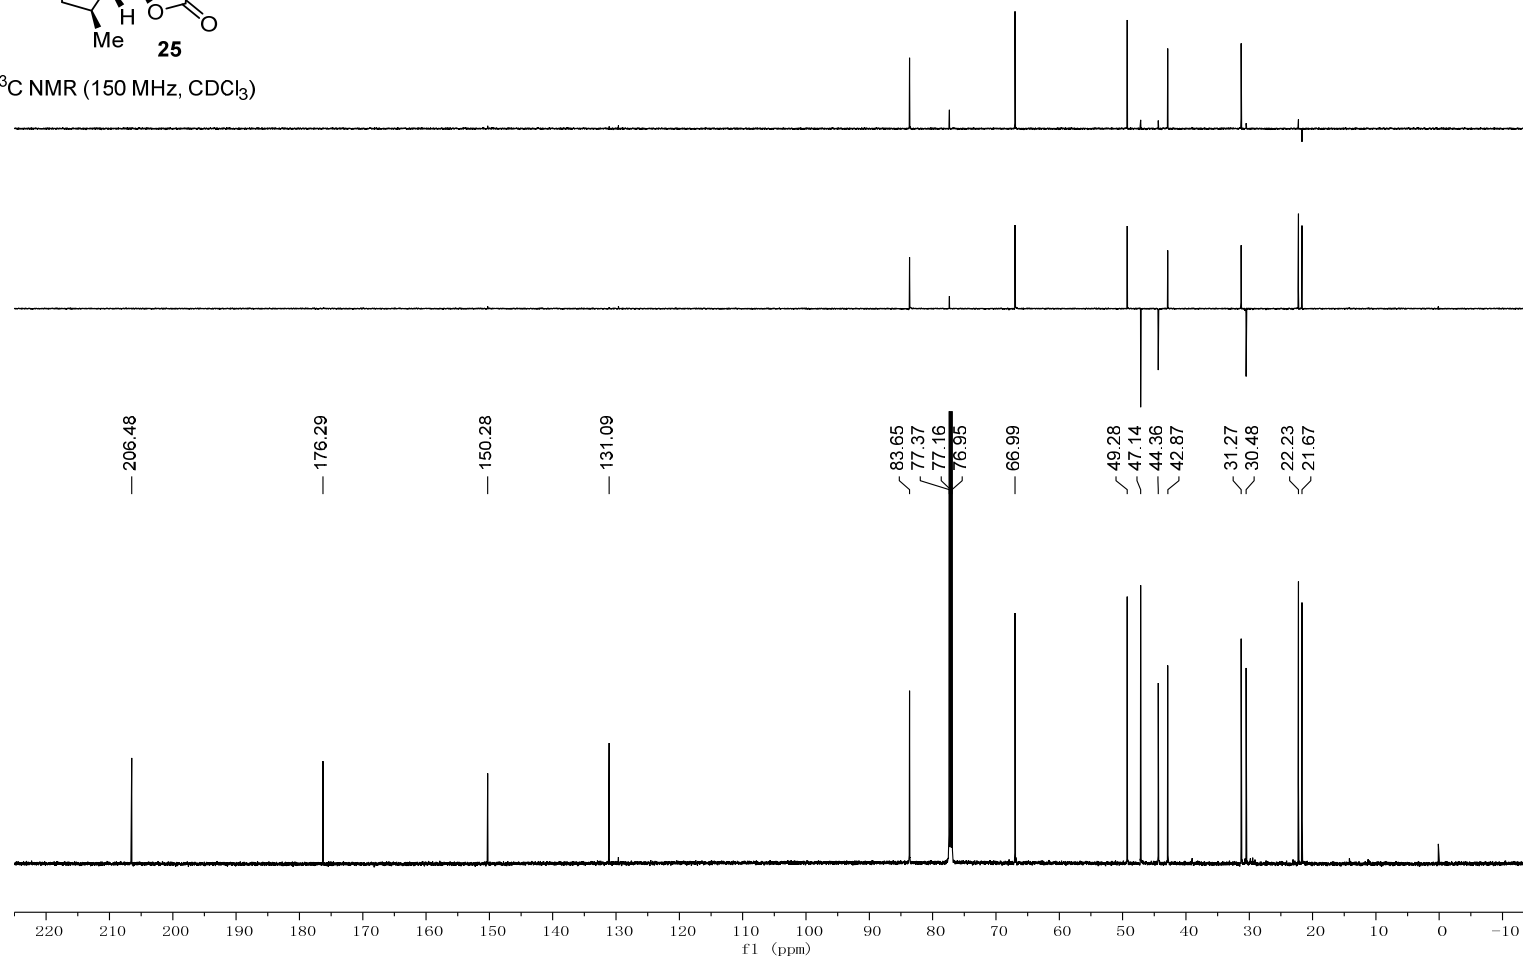

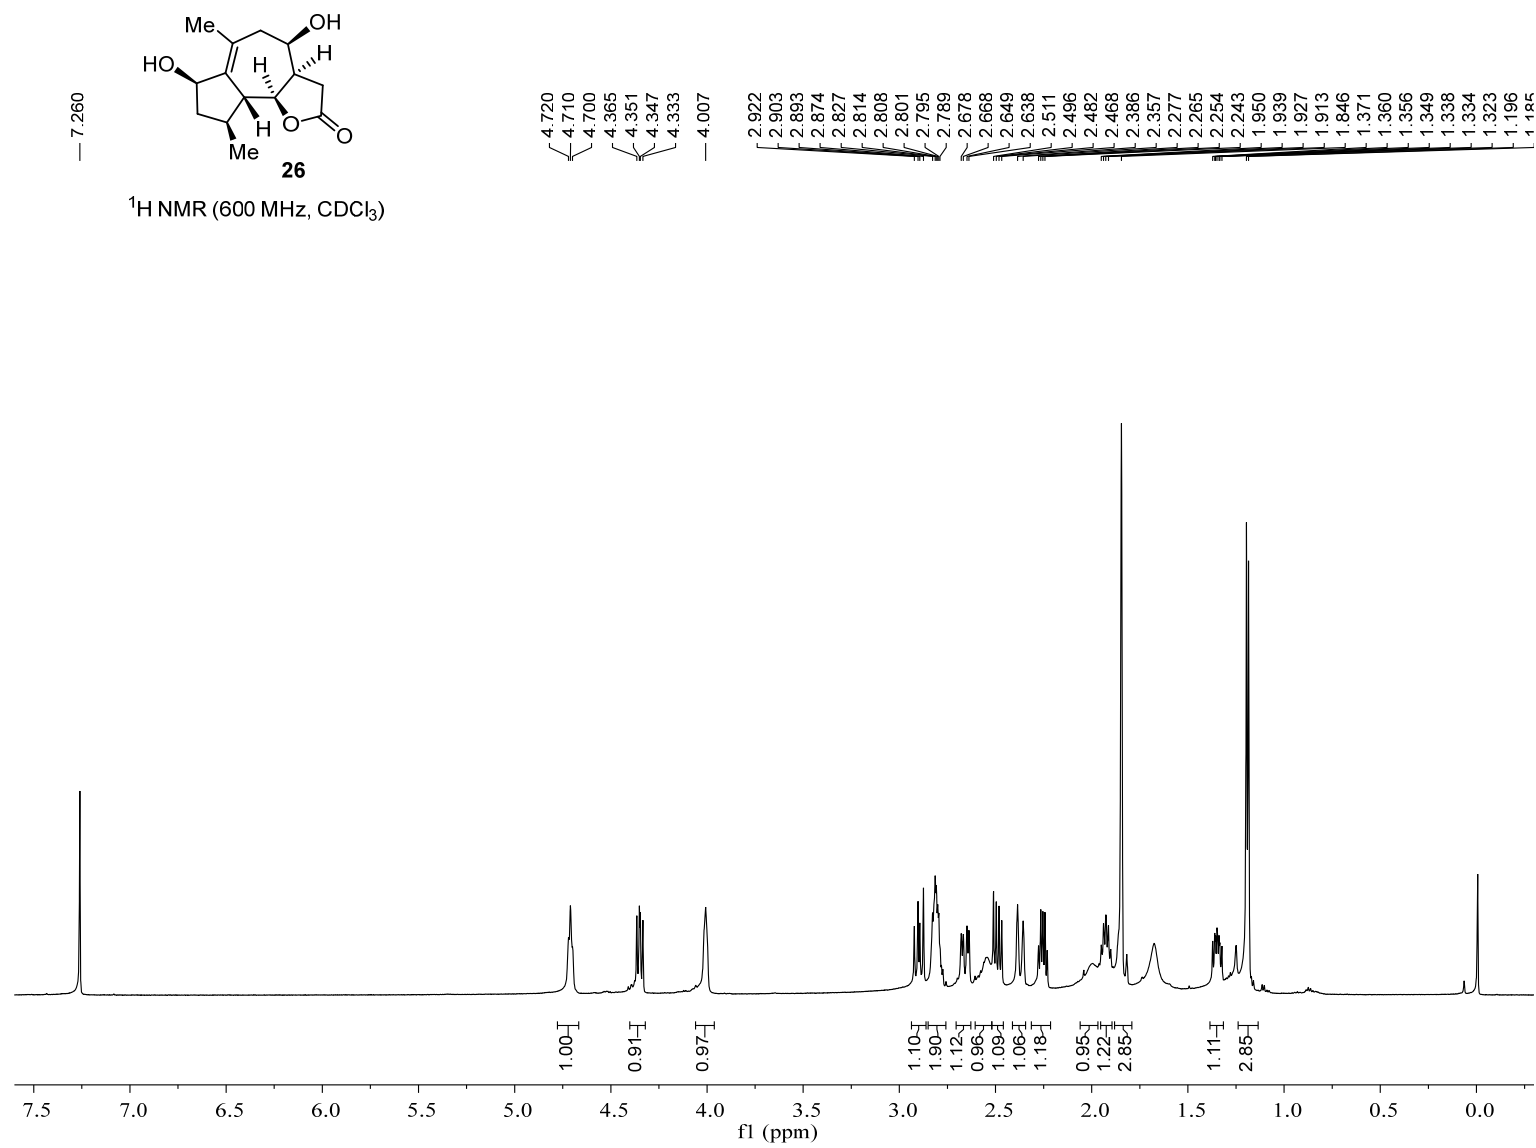

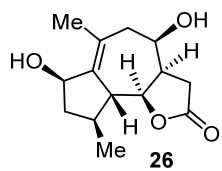

$^{13}\text{C}$  NMR (150 MHz,  $\text{CDCl}_3$ )

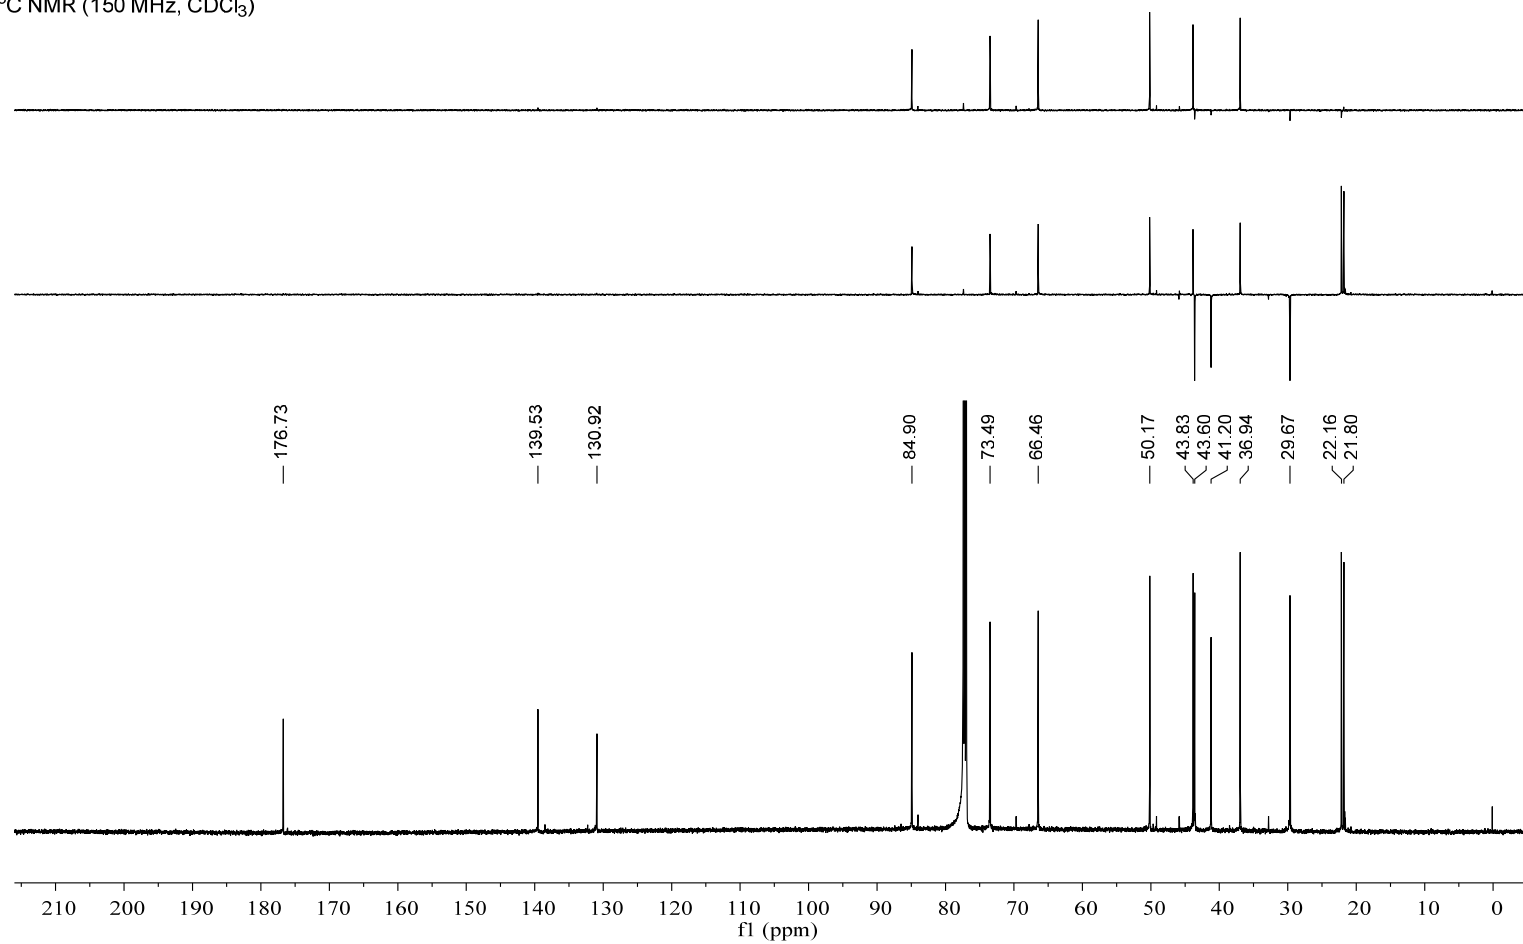

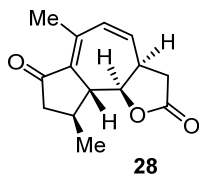

$^1\text{H}$  NMR (600 MHz,  $\text{CD}_3\text{OD}$ )

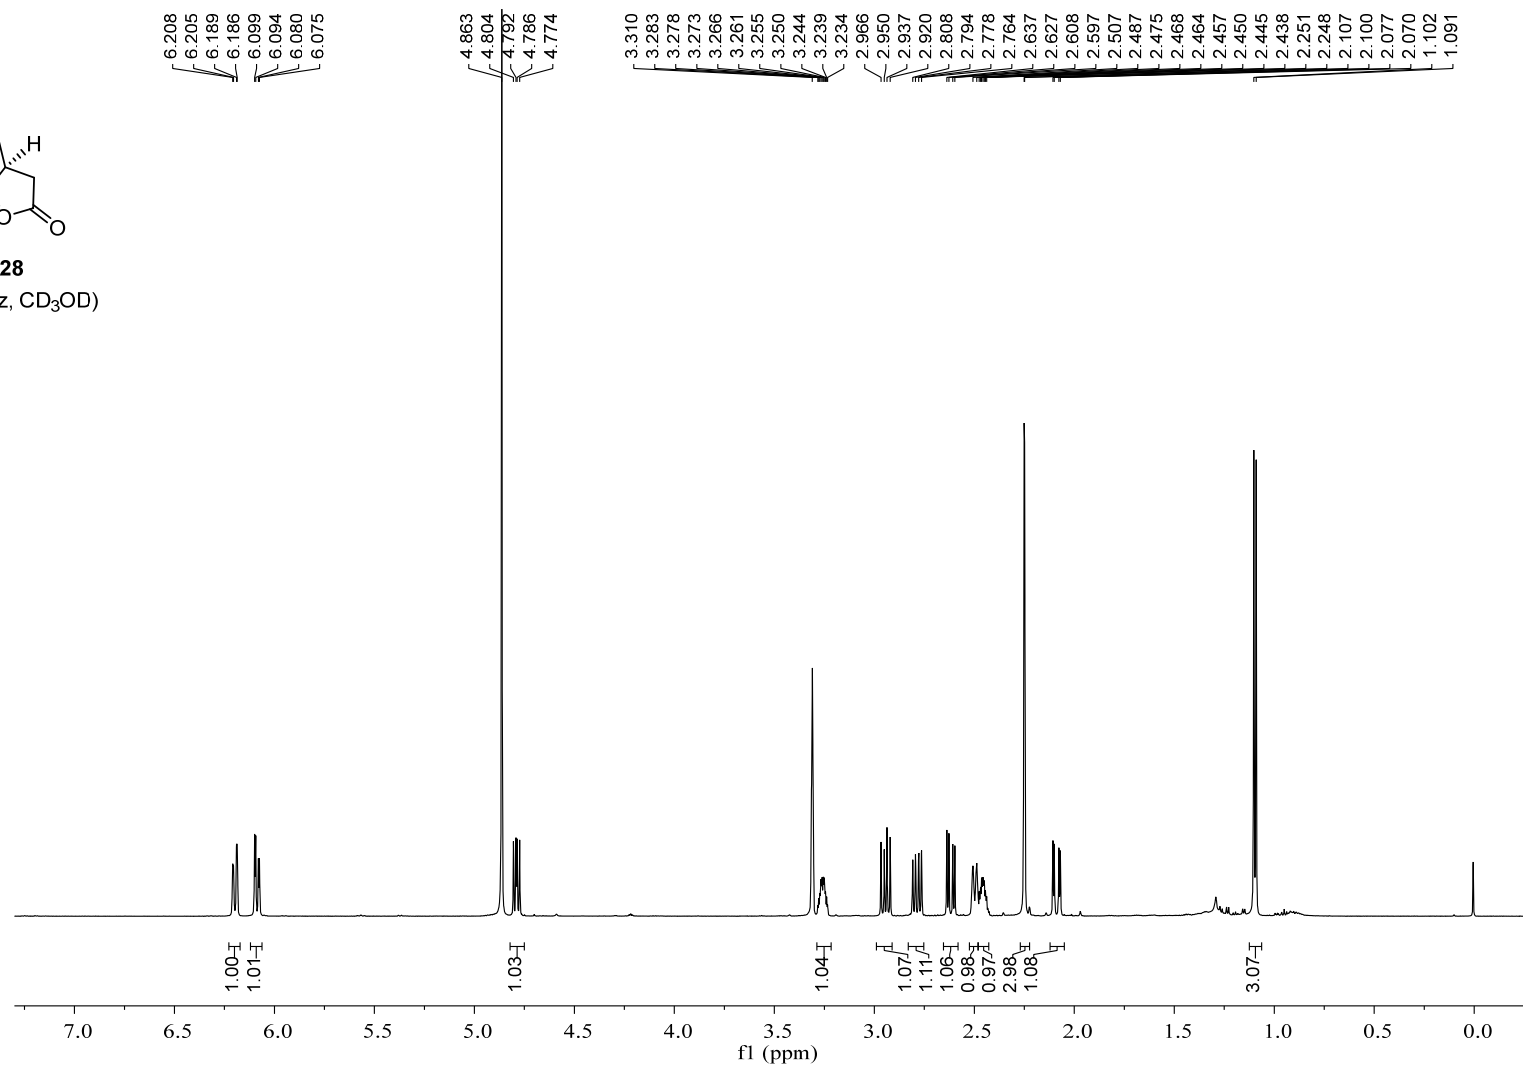

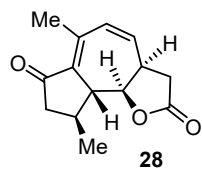

$^{13}\text{C}$  NMR (150 MHz,  $\text{CD}_3\text{OD}$ )

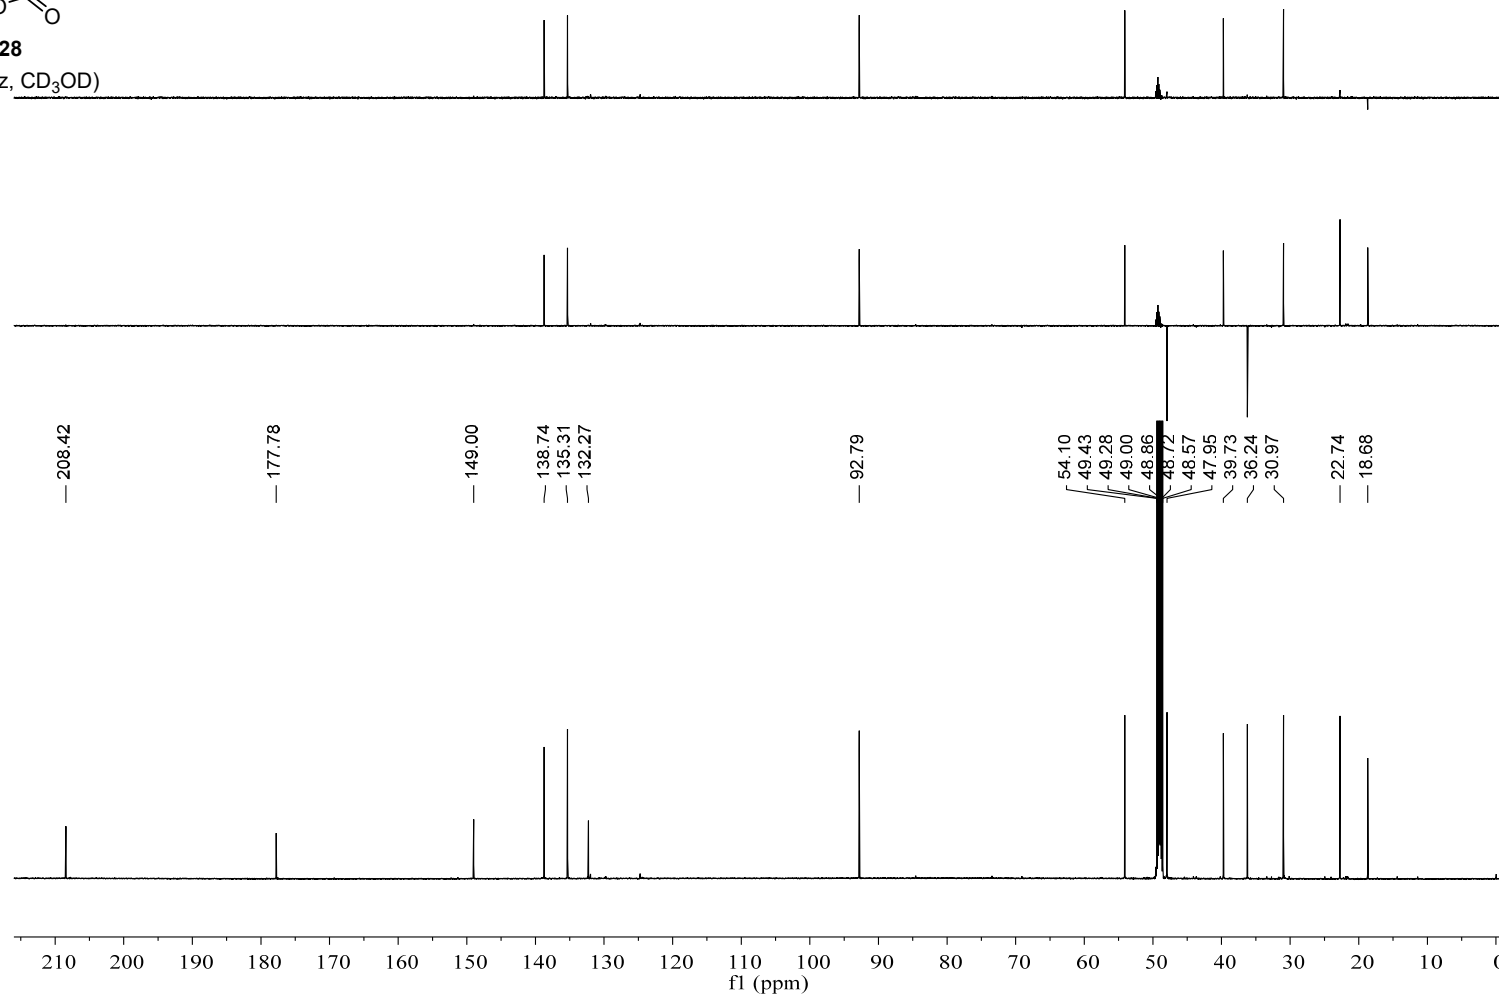

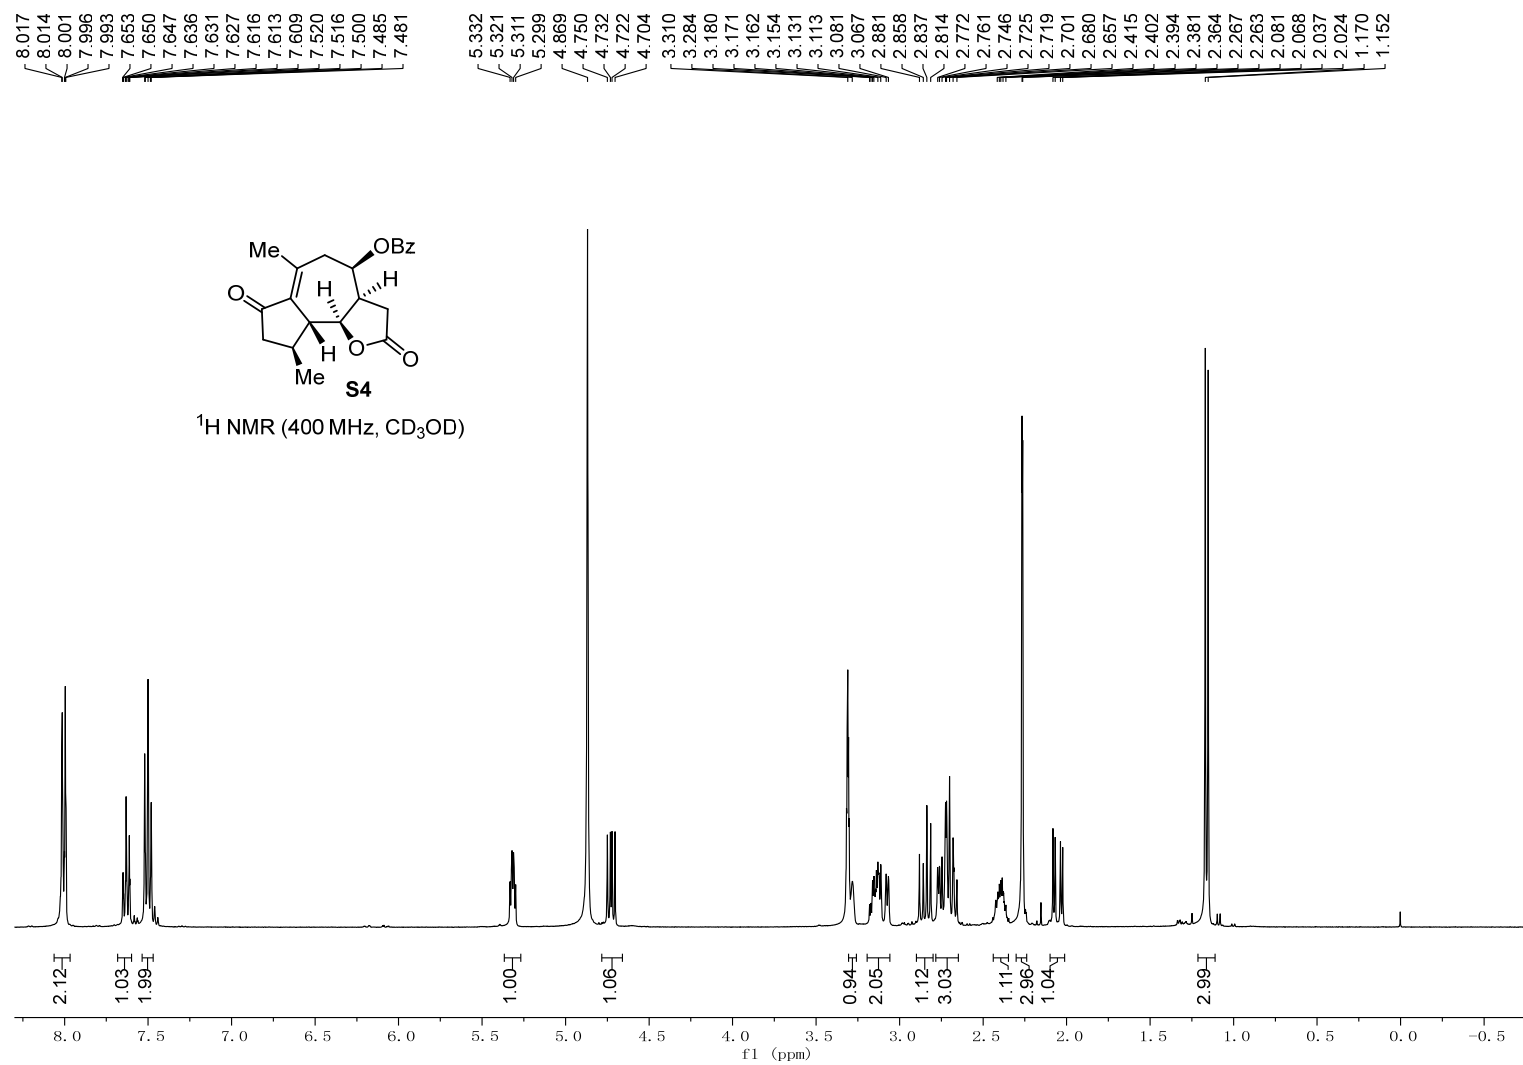

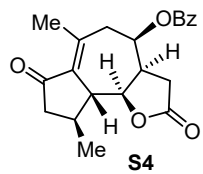

$^{13}\text{C}$  NMR (100 MHz,  $\text{CD}_3\text{OD}$ )

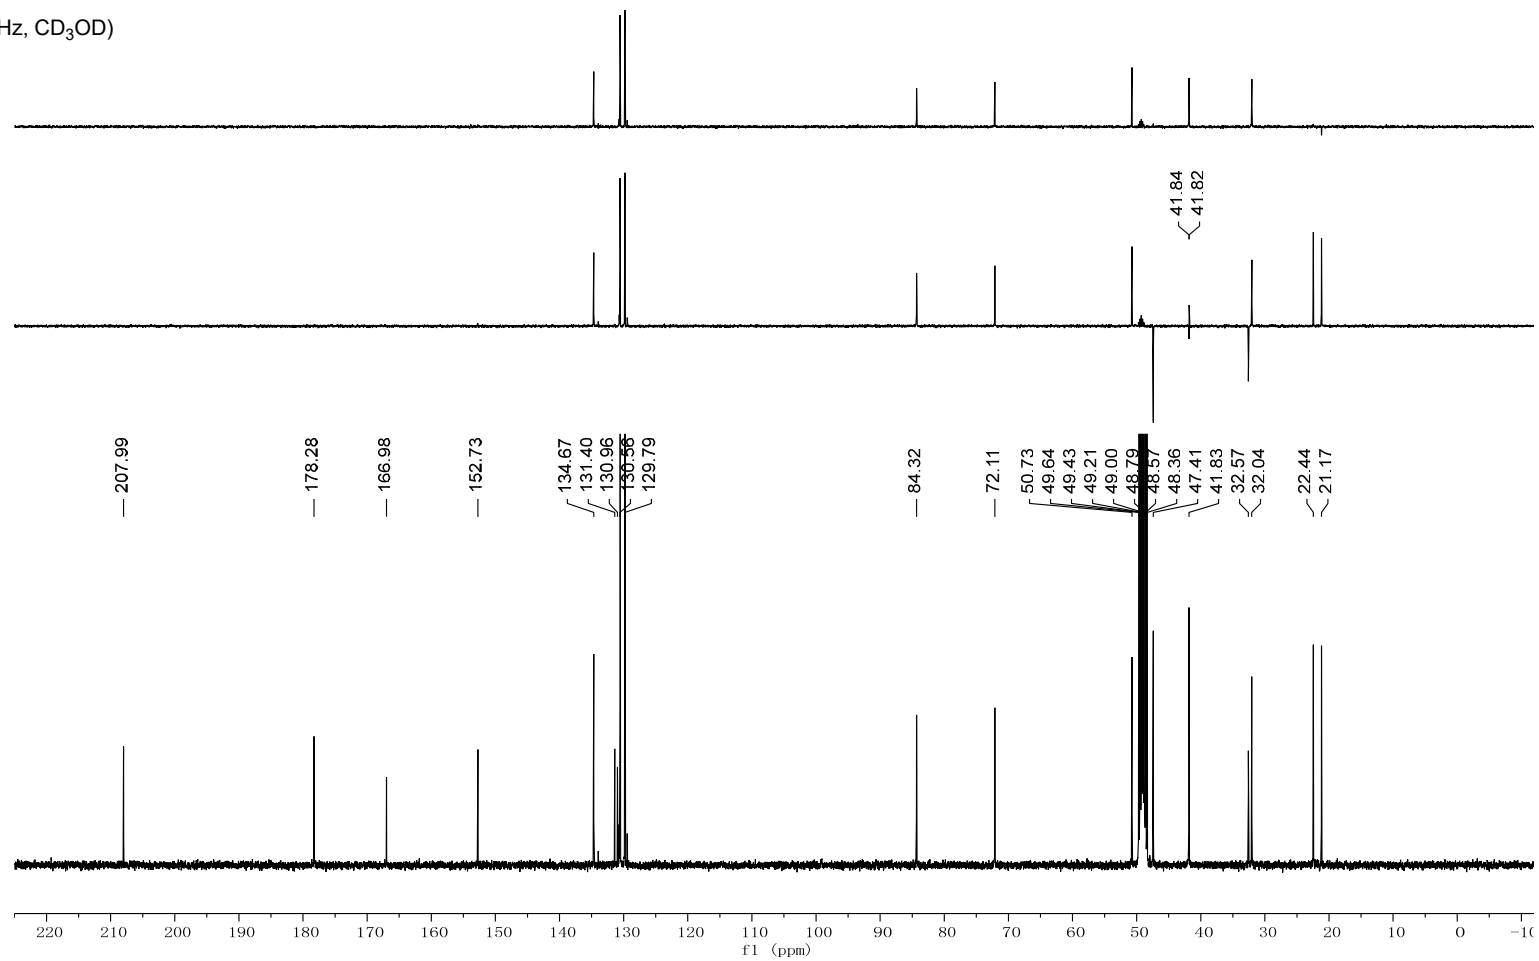

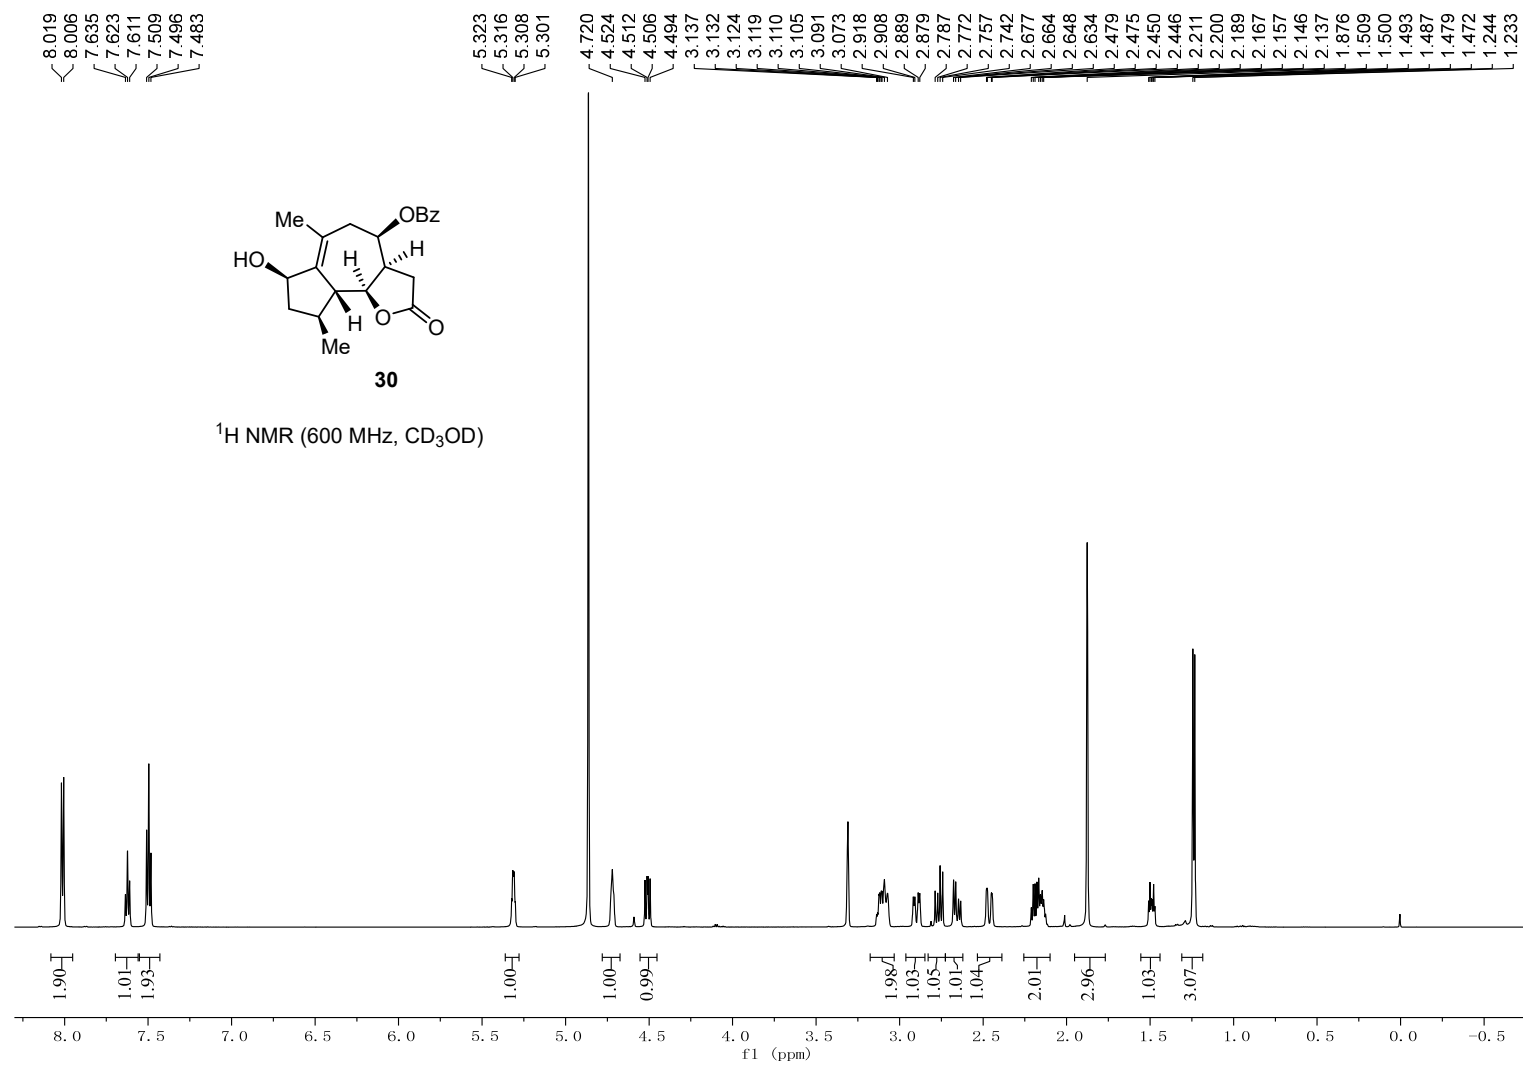

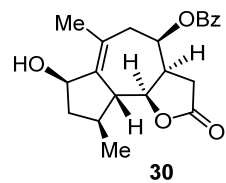

$^{13}\text{C}$  NMR (150 MHz,  $\text{CD}_3\text{OD}$ )

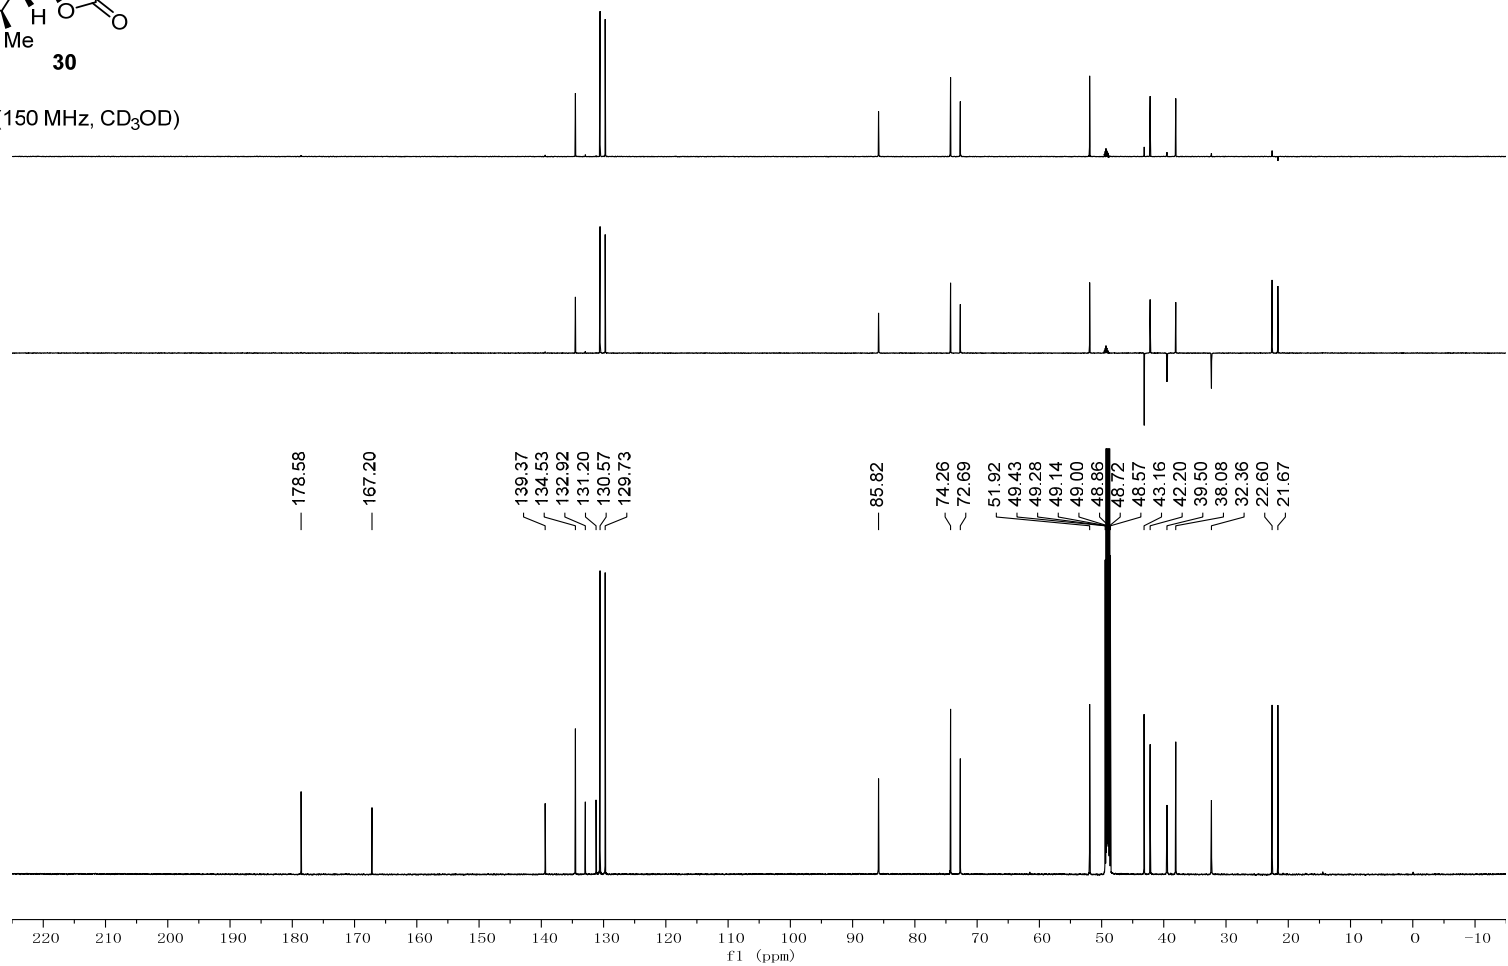

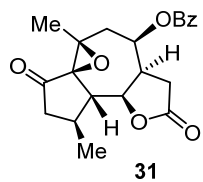

$^1\text{H}$  NMR (400 MHz,  $\text{CDCl}_3$ )

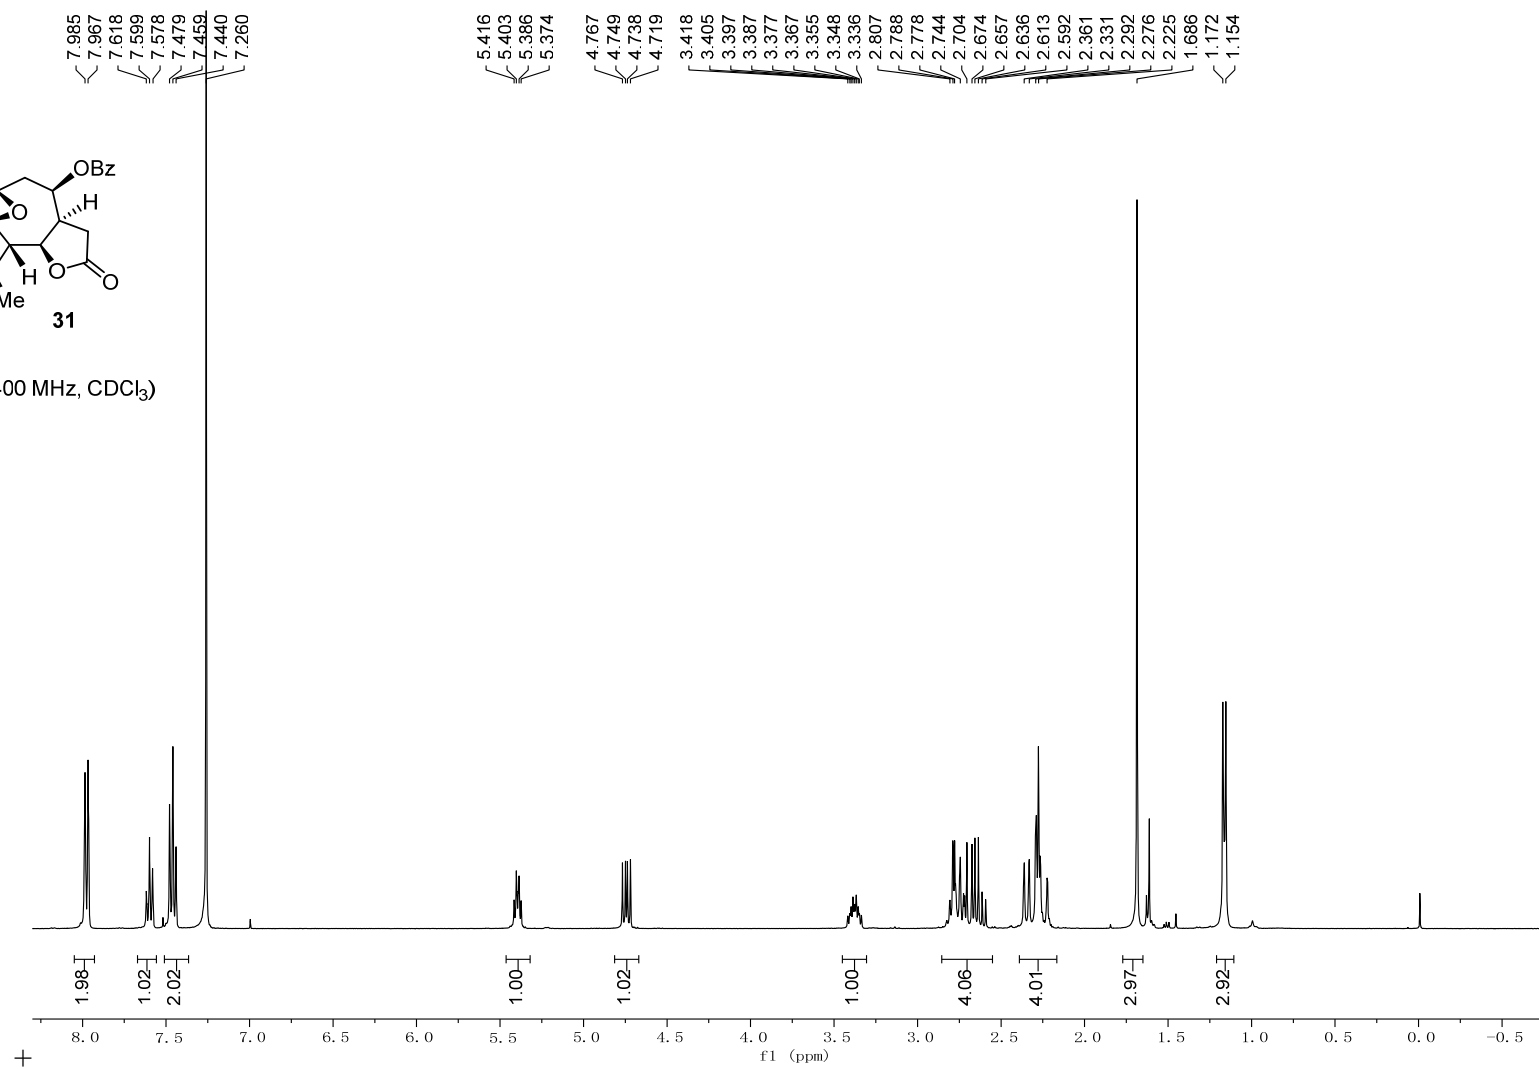

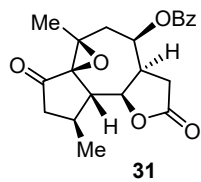

$^{13}\text{C}$  NMR (100 MHz,  $\text{CDCl}_3$ )

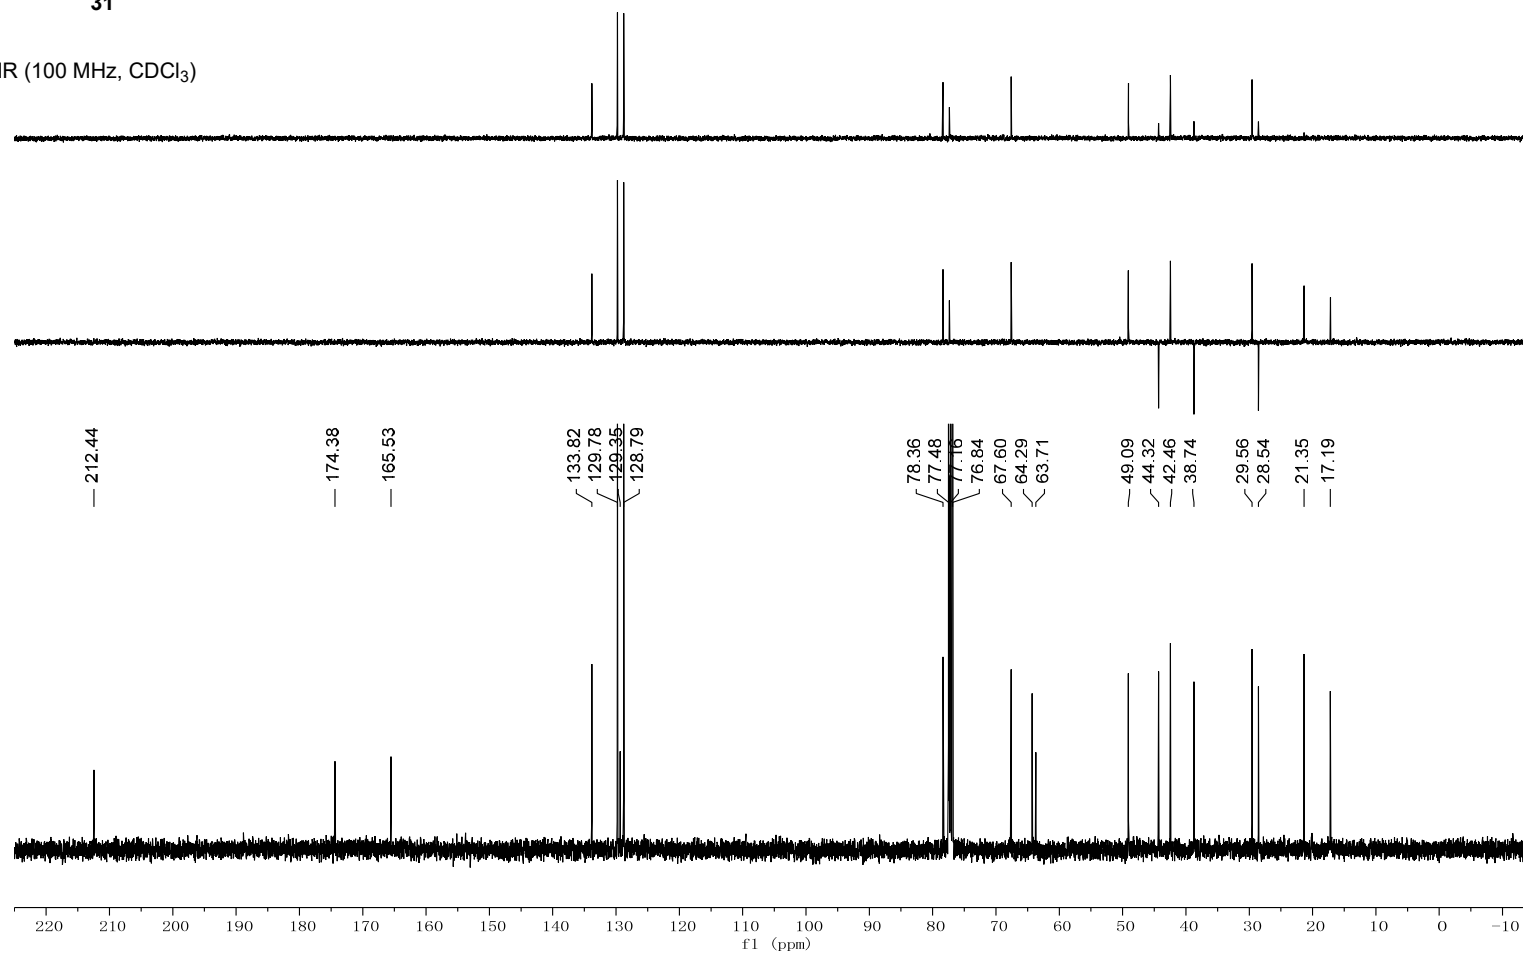

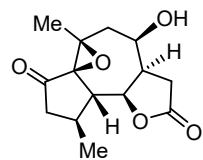

**29**

$^1\text{H}$  NMR (400 MHz,  $\text{CDCl}_3$ )

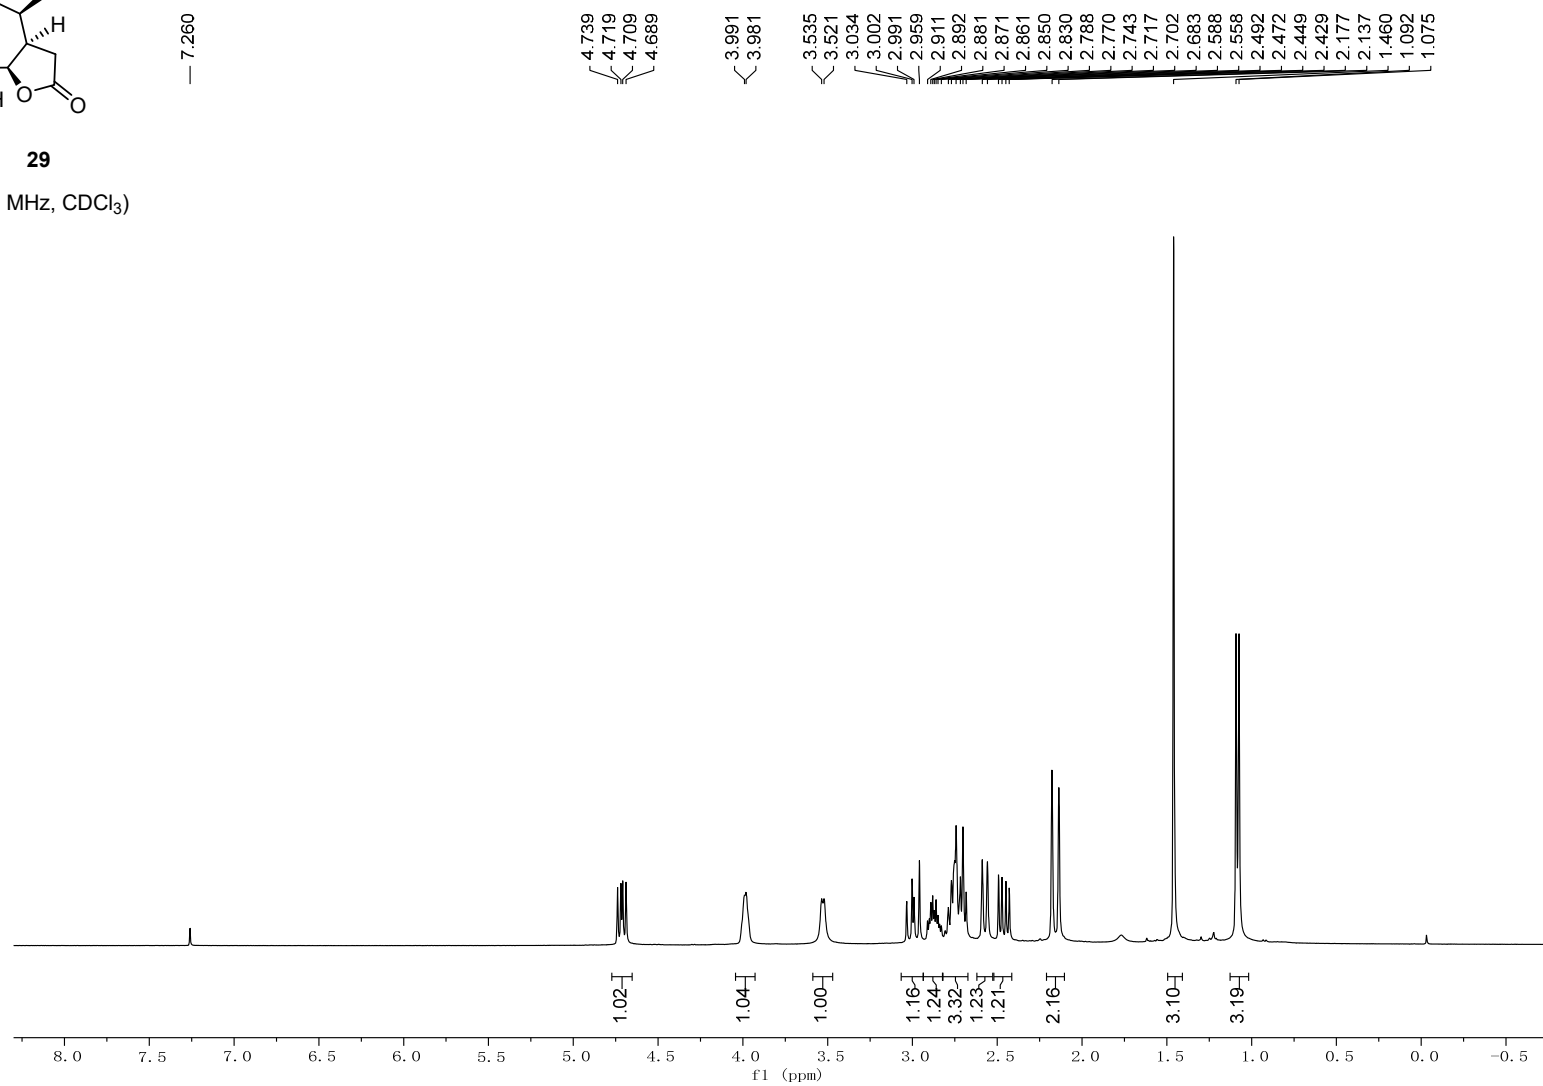

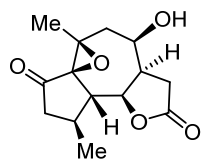

**29**

$^{13}\text{C}$  NMR (100 MHz,  $\text{CDCl}_3$ )

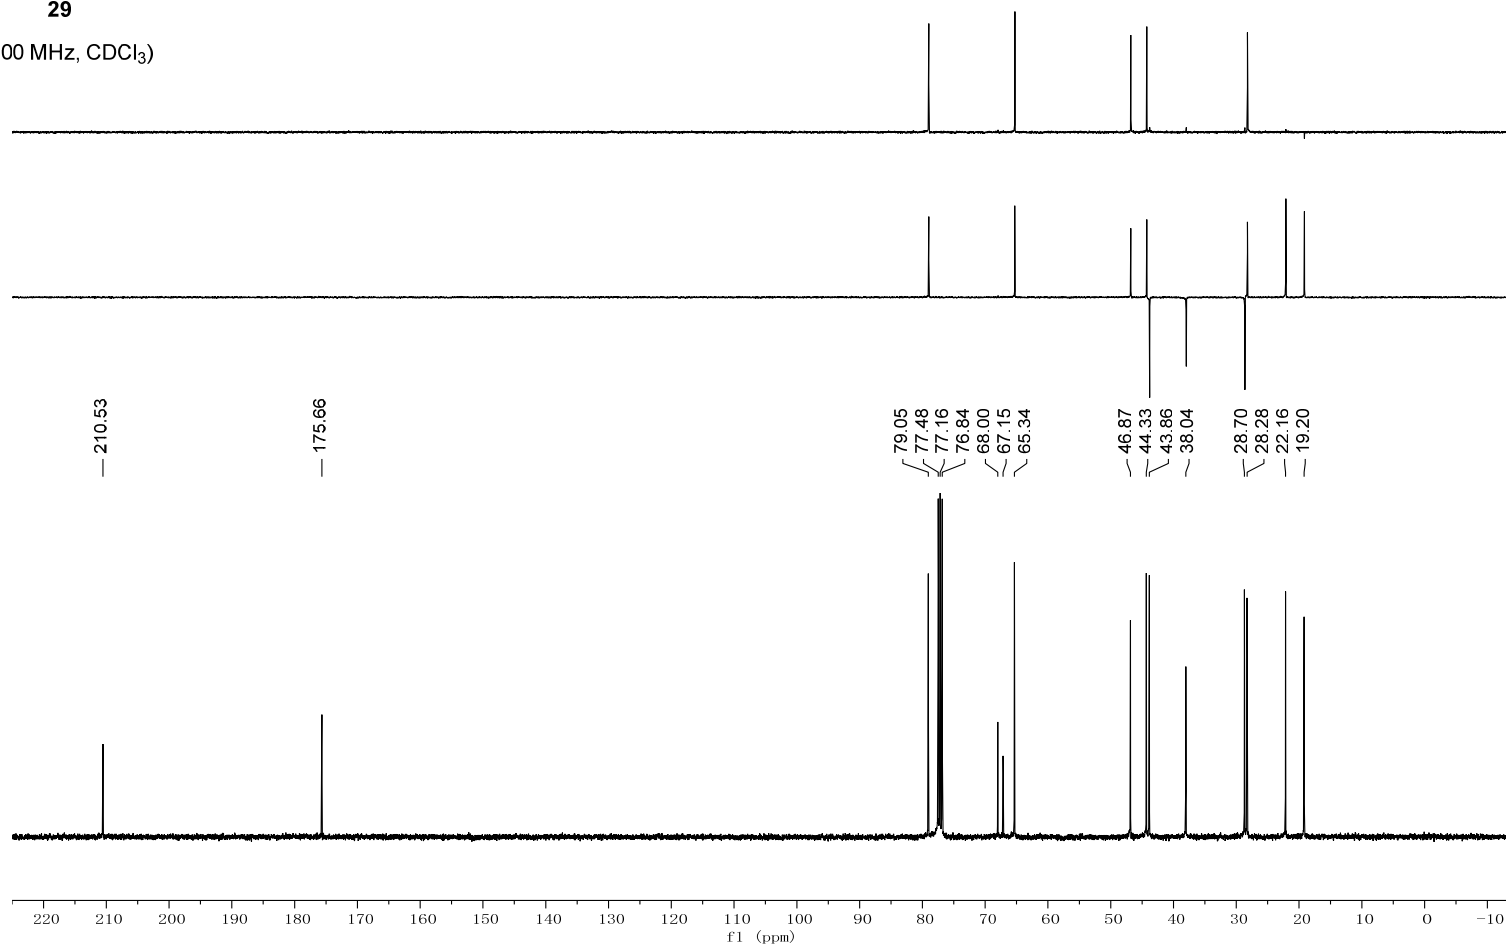

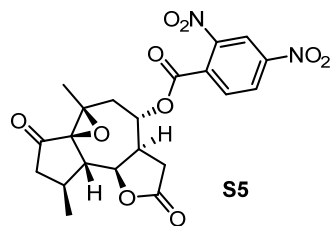

$^1\text{H}$  NMR (400 MHz,  $\text{CDCl}_3$ )

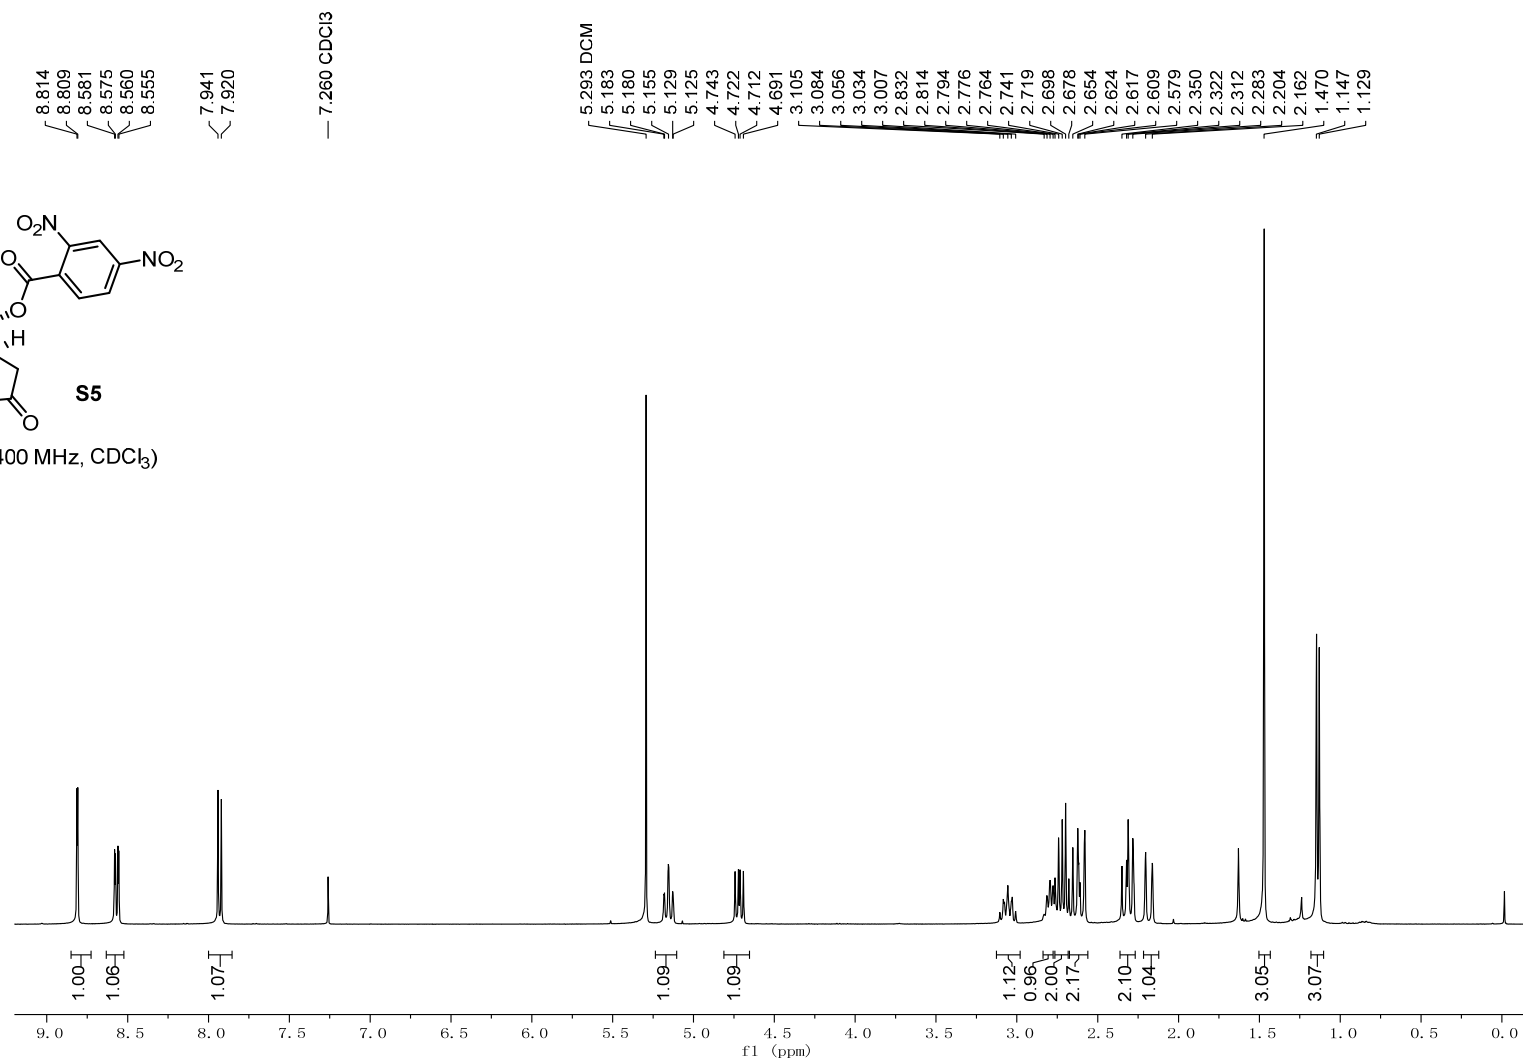

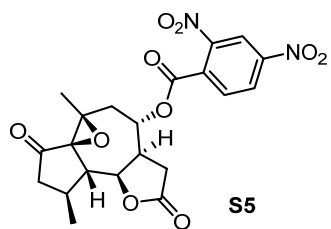

$^{13}\text{C}$  NMR (100 MHz,  $\text{CDCl}_3$ )

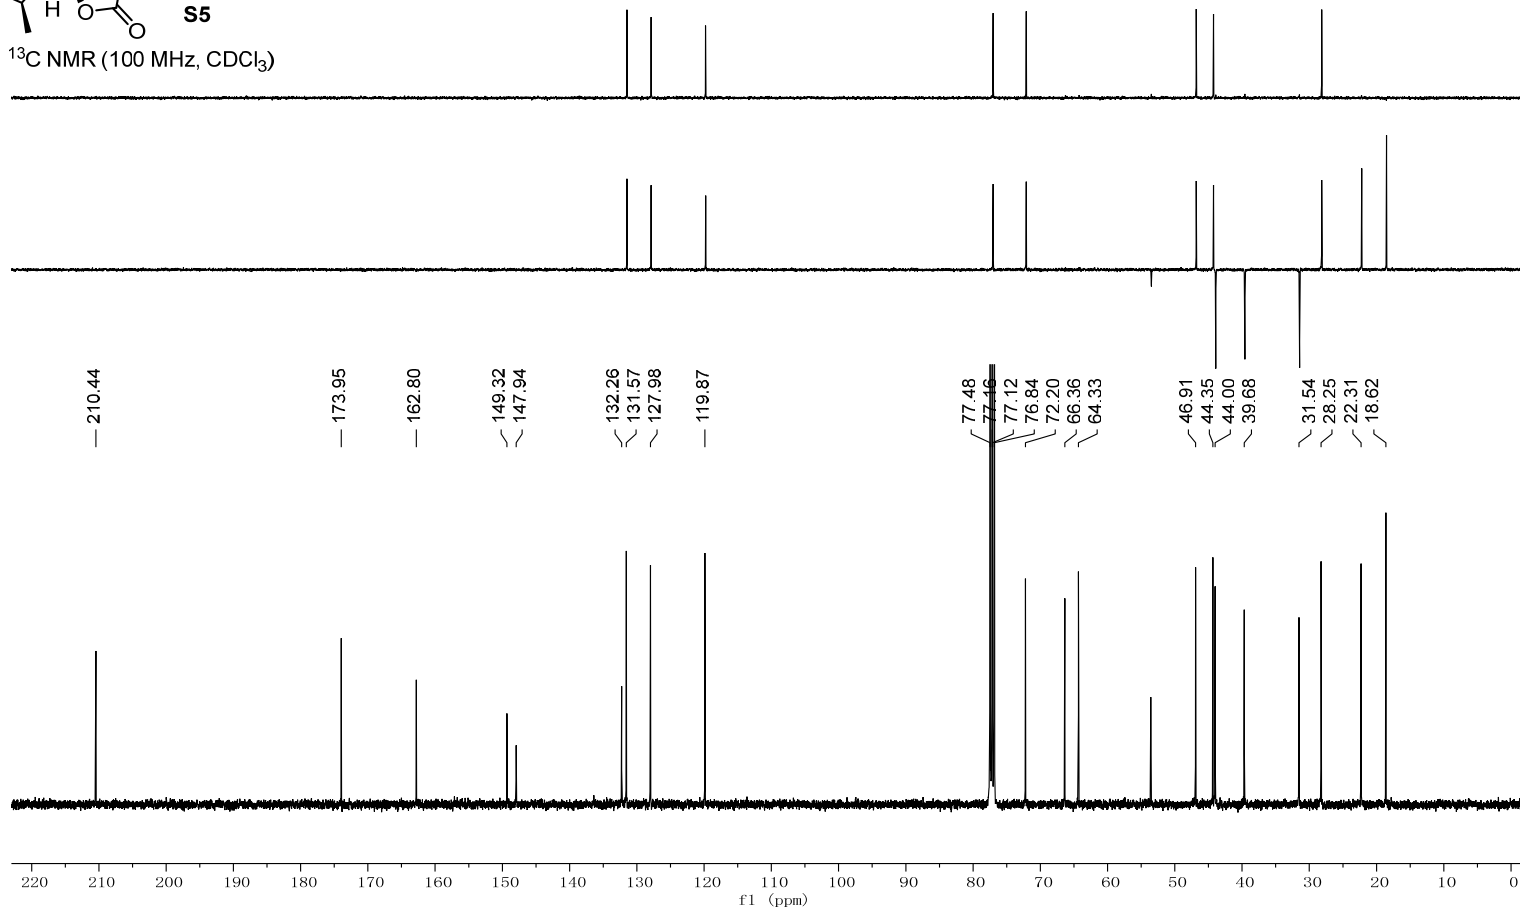

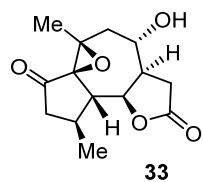

$^1\text{H}$  NMR (600 MHz,  $\text{CDCl}_3$ )

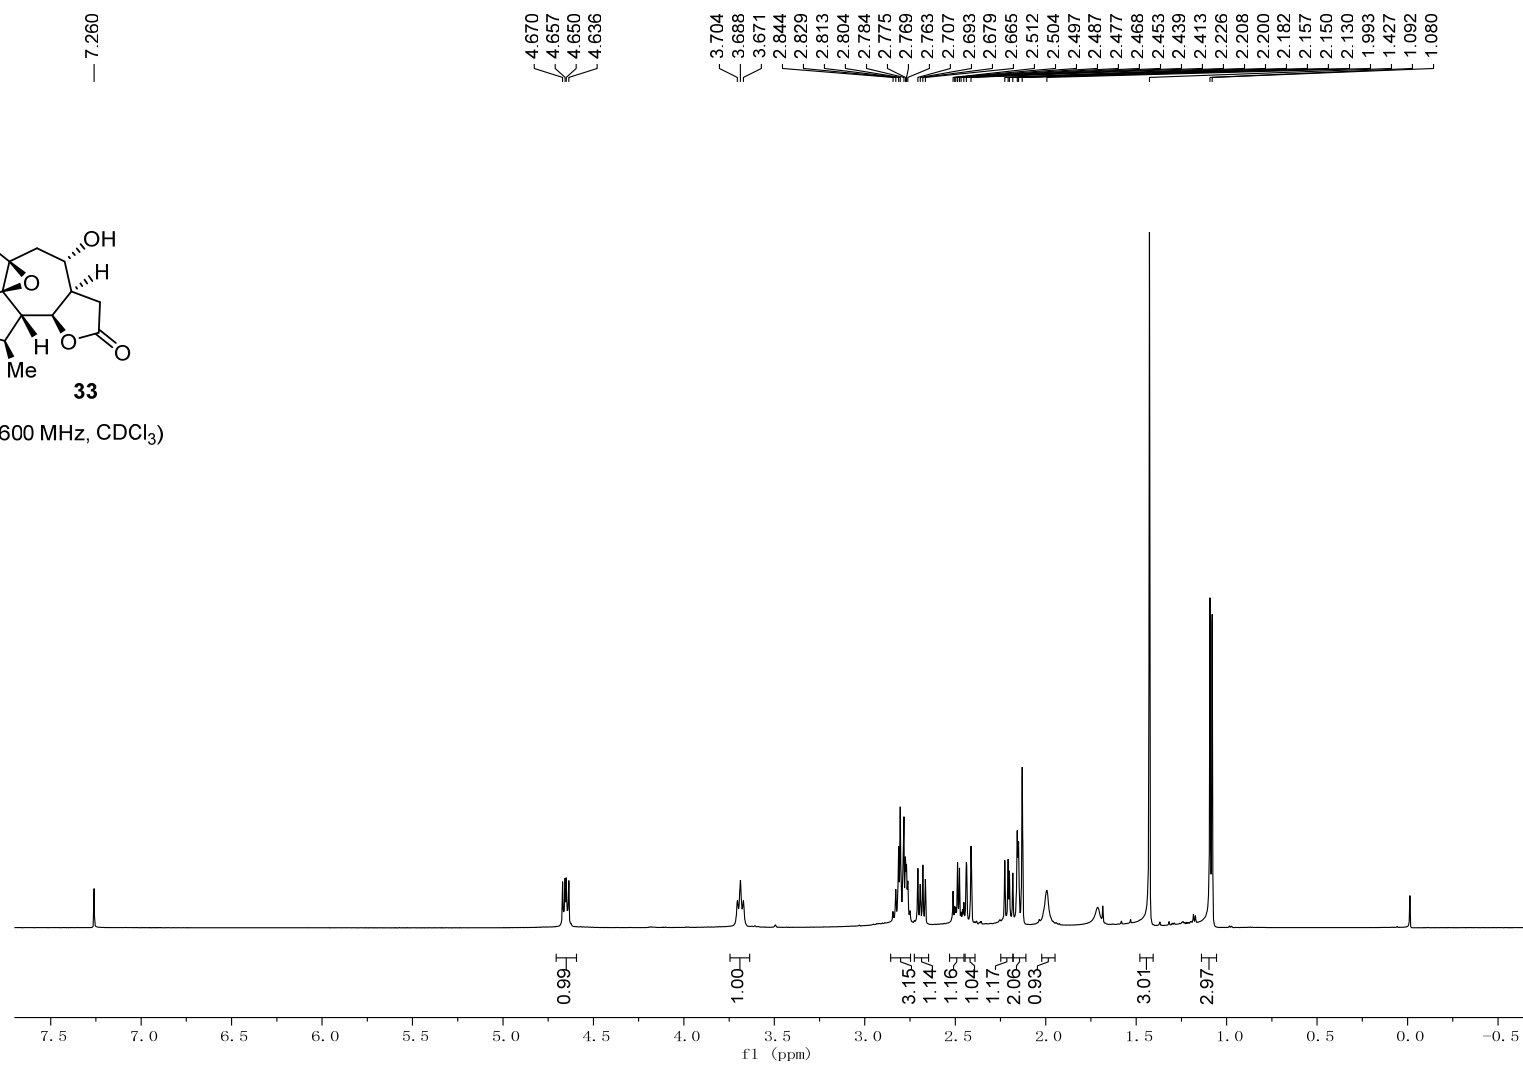

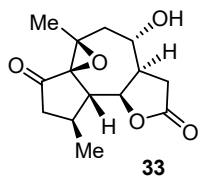

$^{13}\text{C}$  NMR (150 MHz,  $\text{CDCl}_3$ )

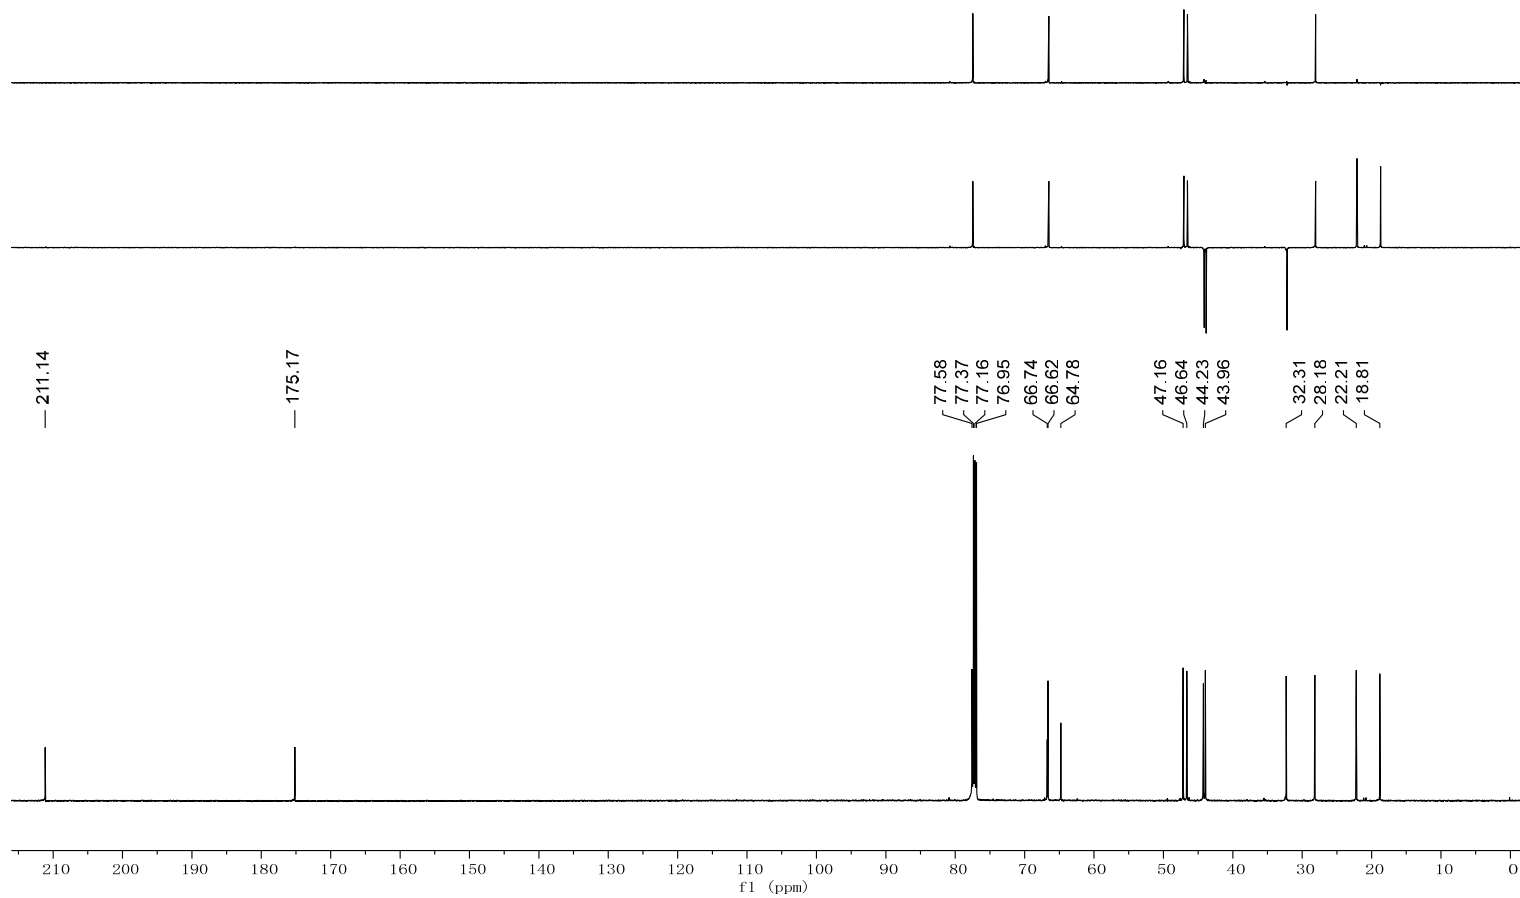

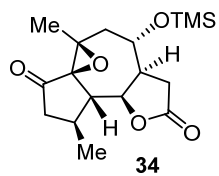

$^1\text{H}$  NMR (400 MHz,  $\text{CD}_3\text{OD}$ )

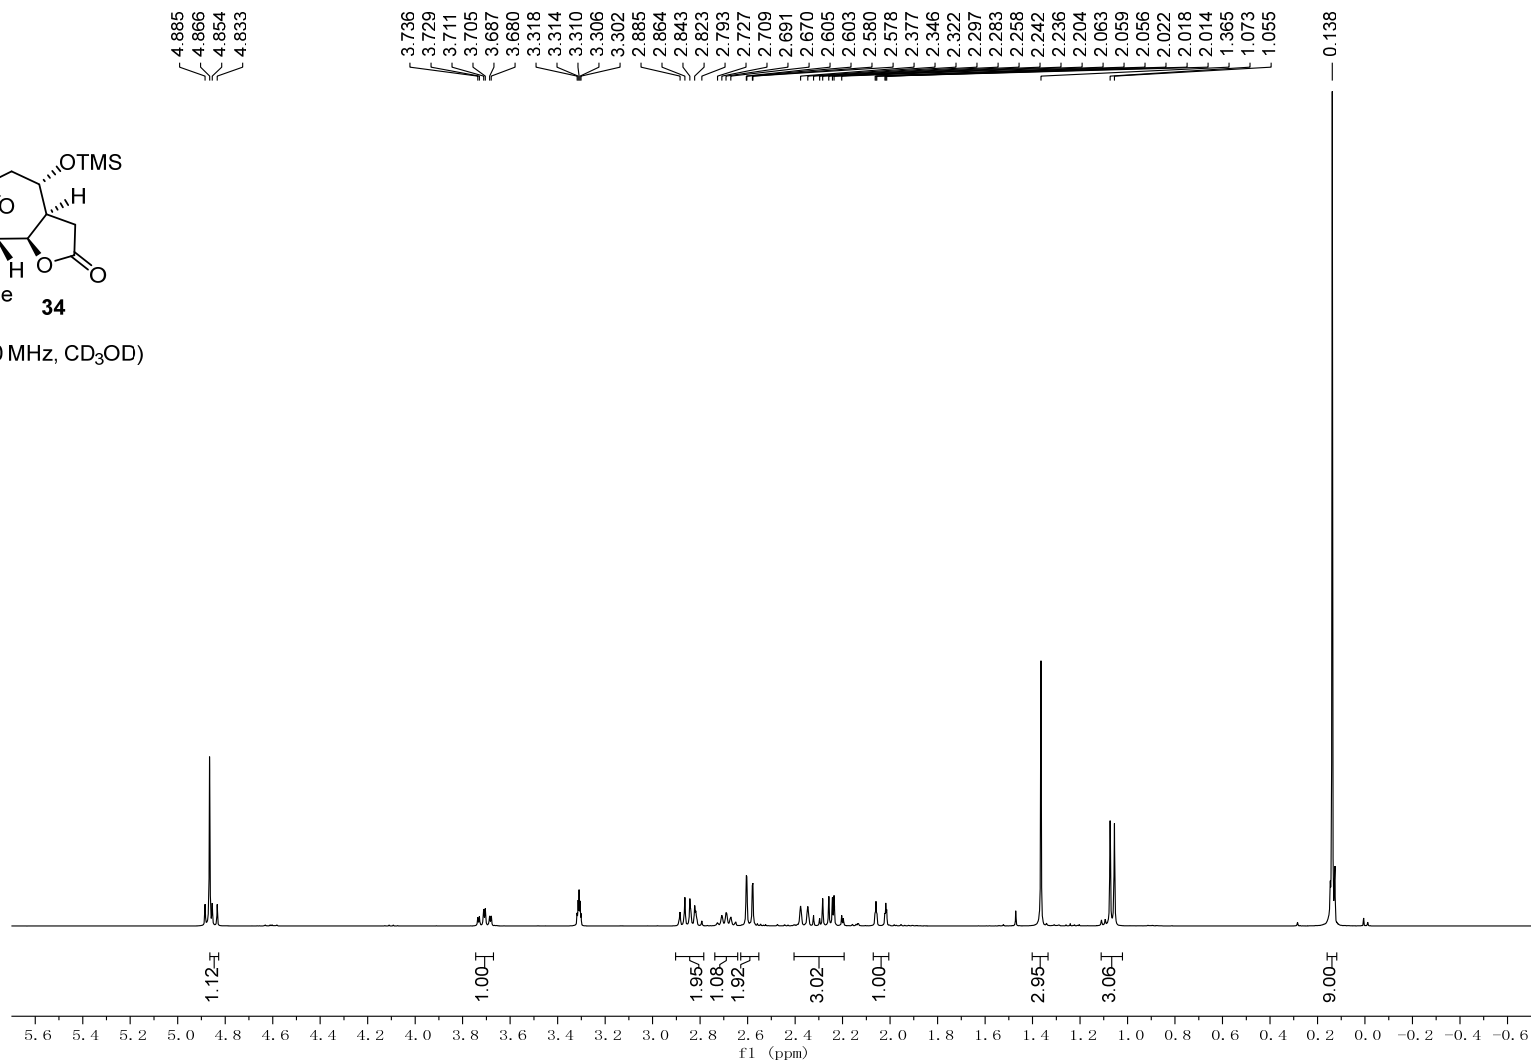

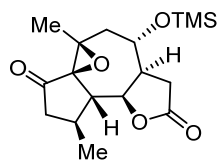

**34**

$^{13}\text{C}$  NMR (100 MHz,  $\text{CD}_3\text{OD}$ )

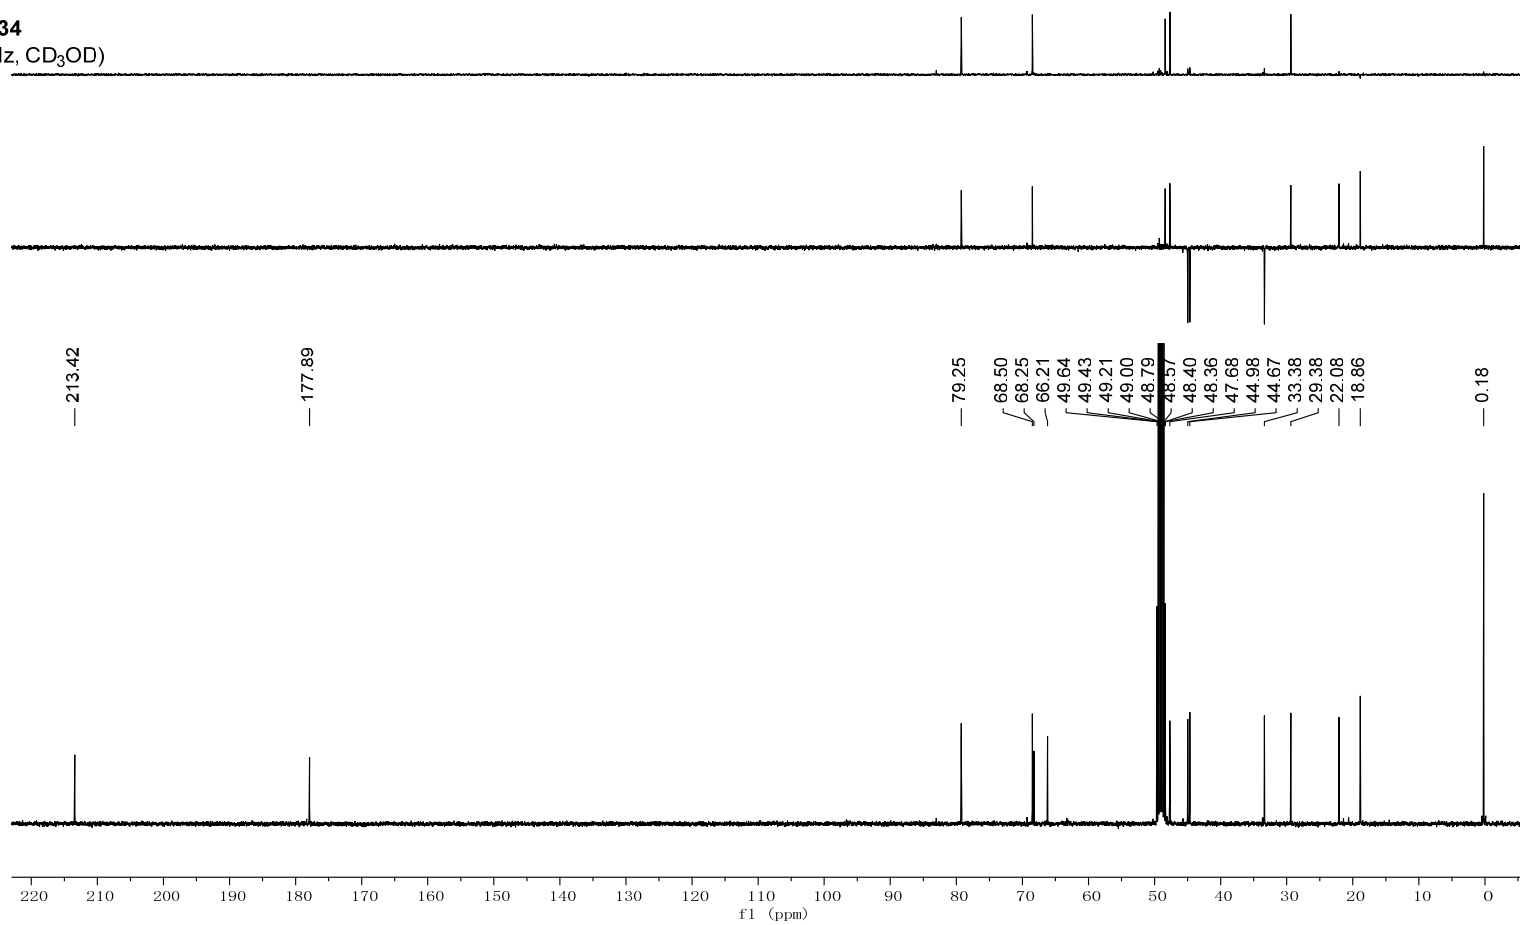

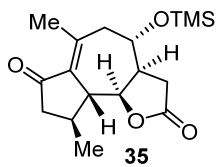

$^1\text{H}$  NMR (600 MHz,  $\text{CD}_3\text{OD}$ )

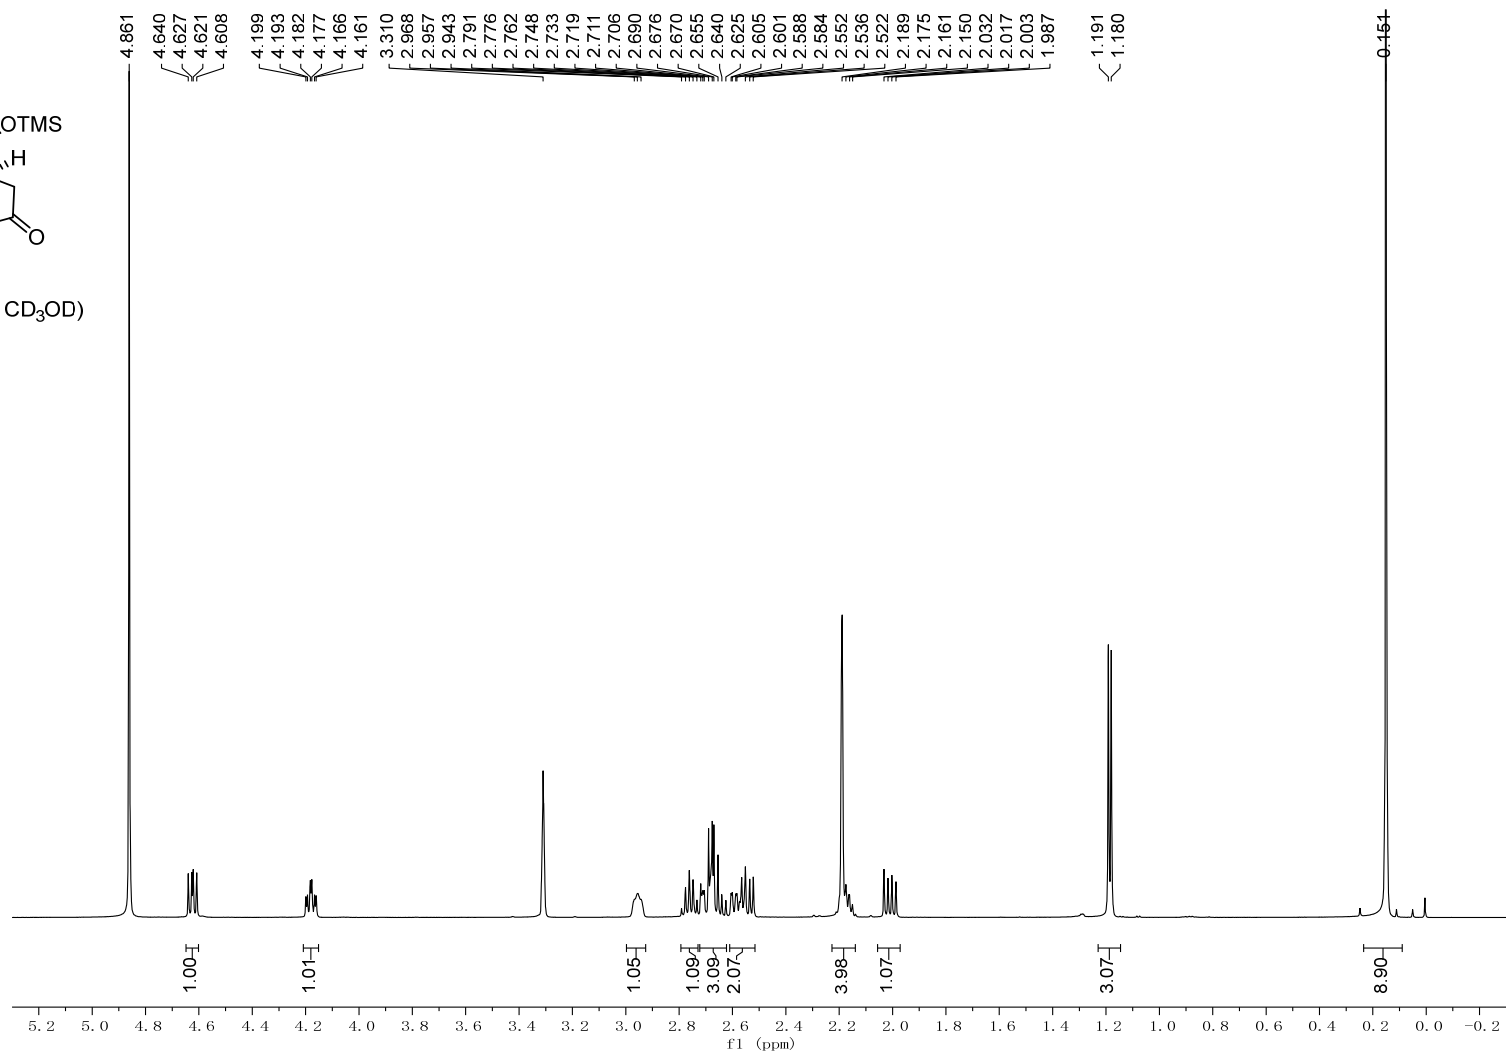

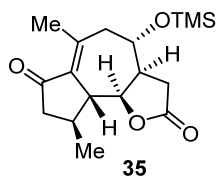

$^{13}\text{C}$  NMR (150 MHz,  $\text{CD}_3\text{OD}$ )

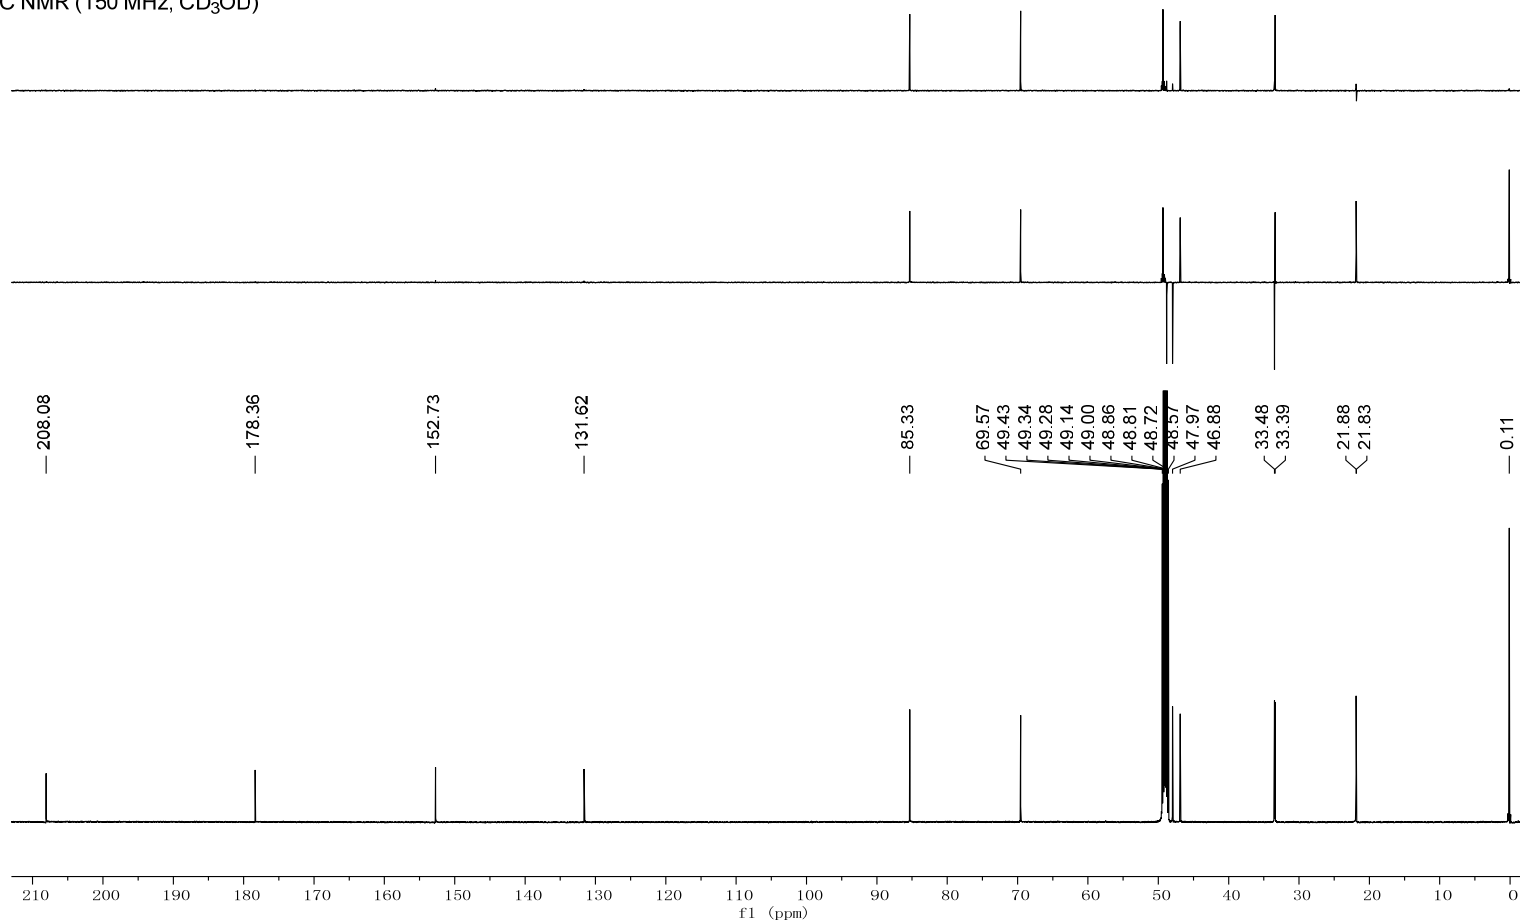

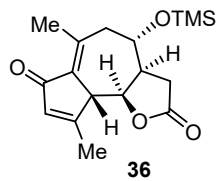

$^1\text{H}$  NMR (600 MHz,  $\text{CD}_3\text{OD}$ )

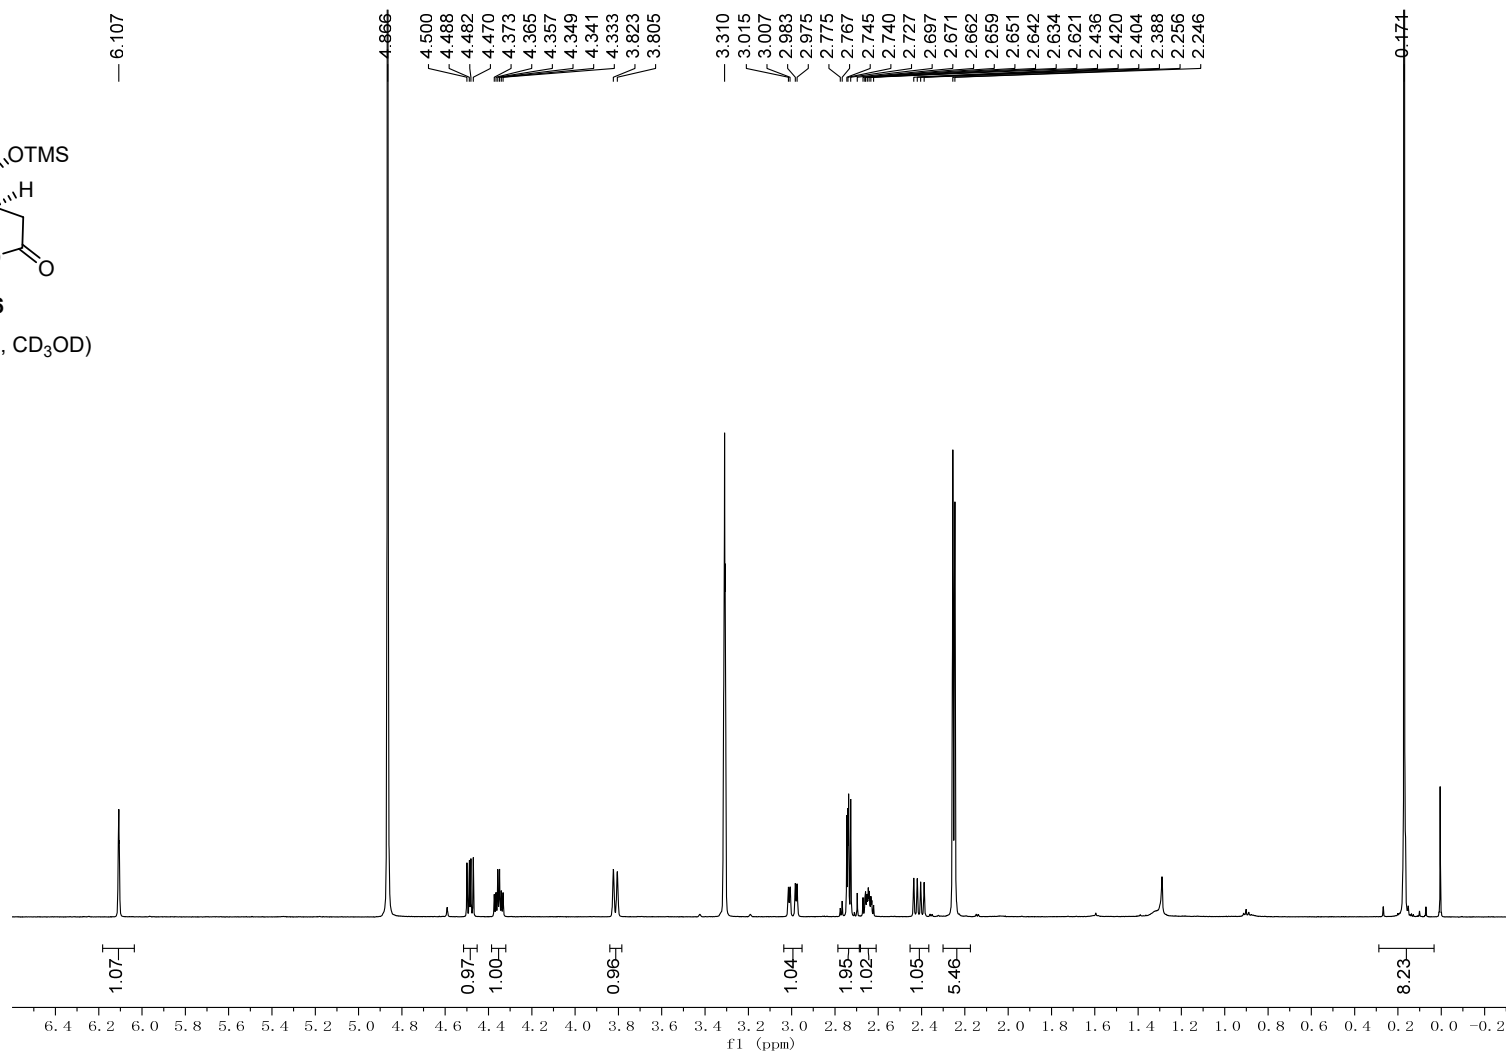

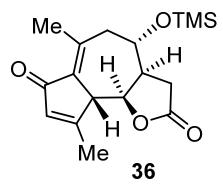

$^{13}\text{C}$  NMR (150 MHz,  $\text{CD}_3\text{OD}$ )

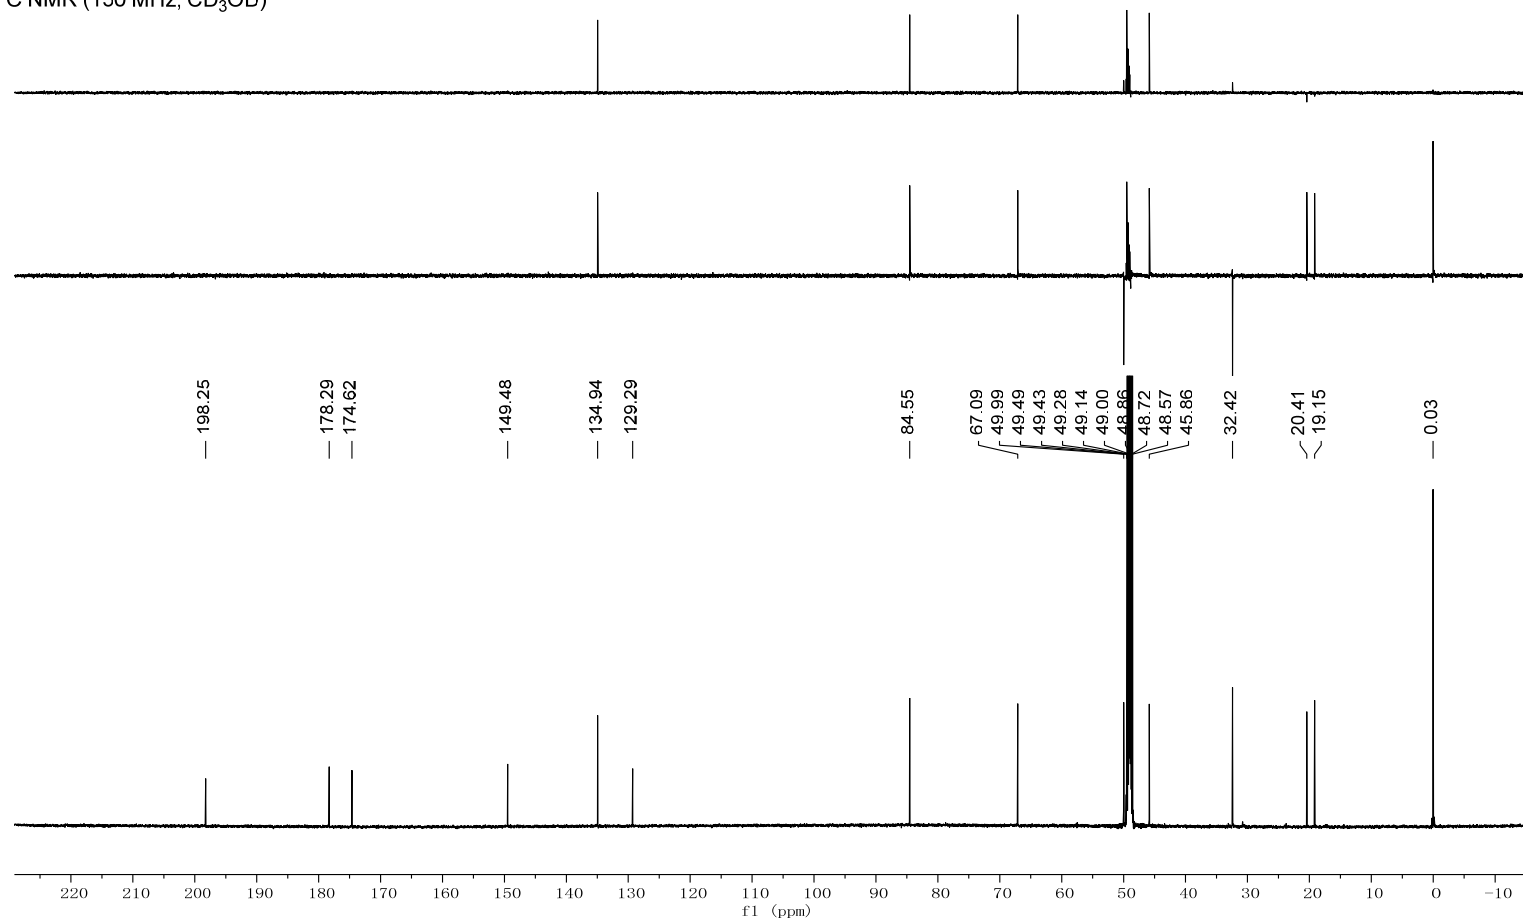

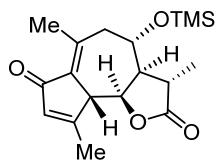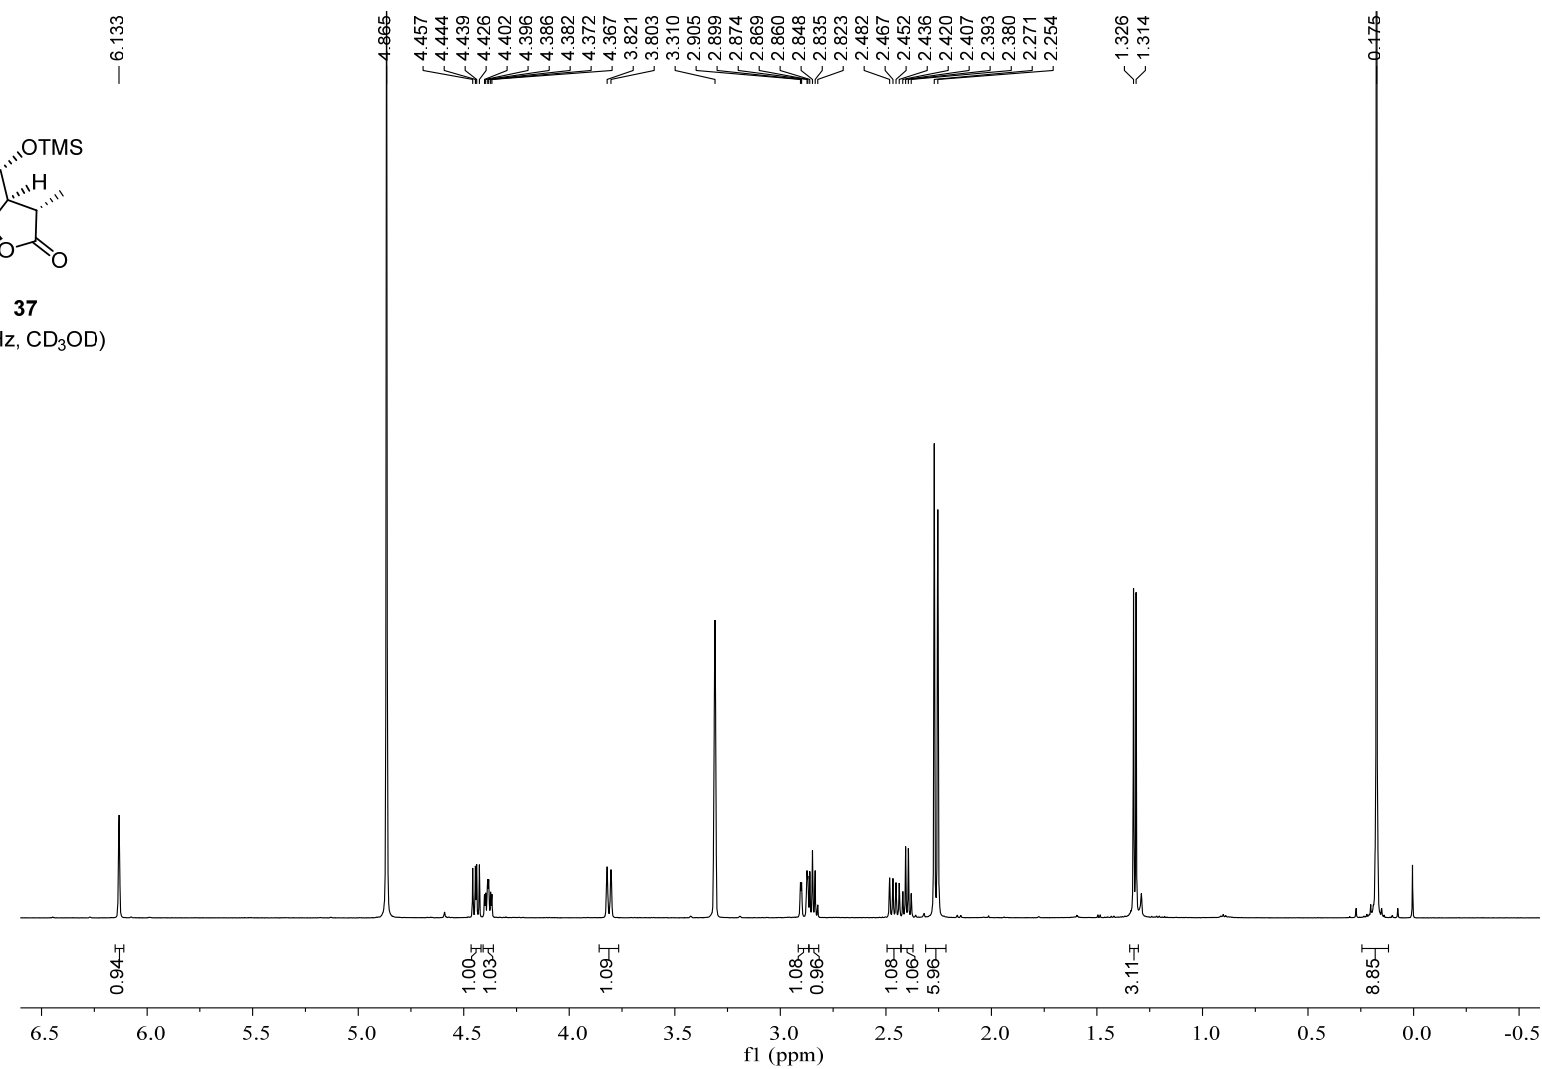

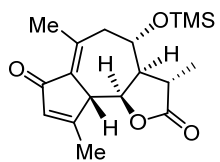

**37**

$^{13}\text{C}$  NMR (150 MHz,  $\text{CD}_3\text{OD}$ )

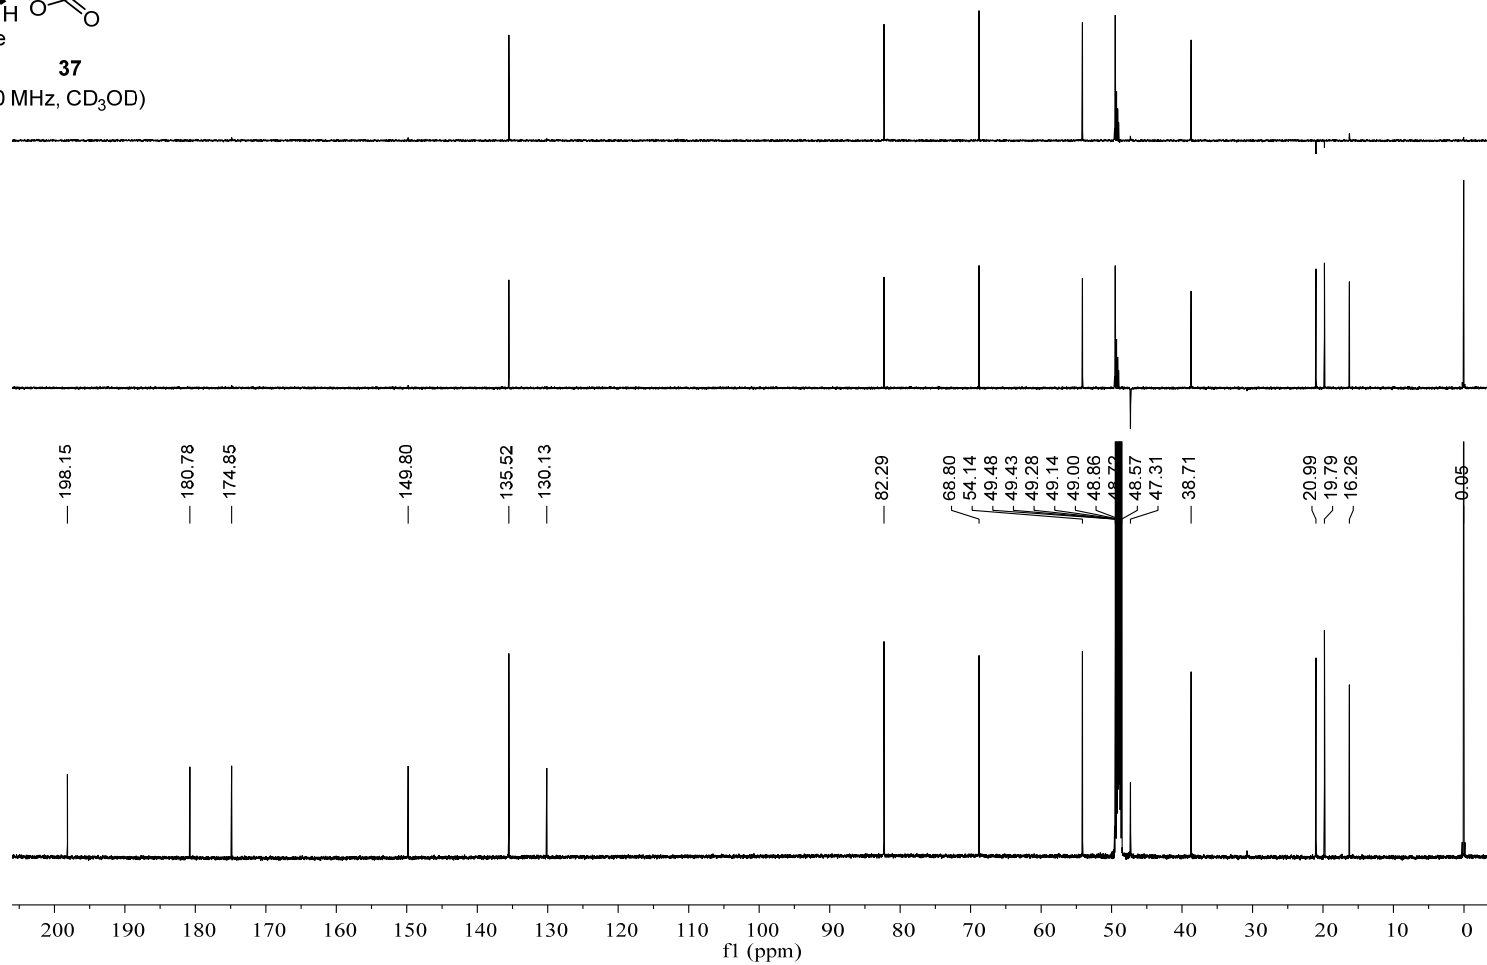

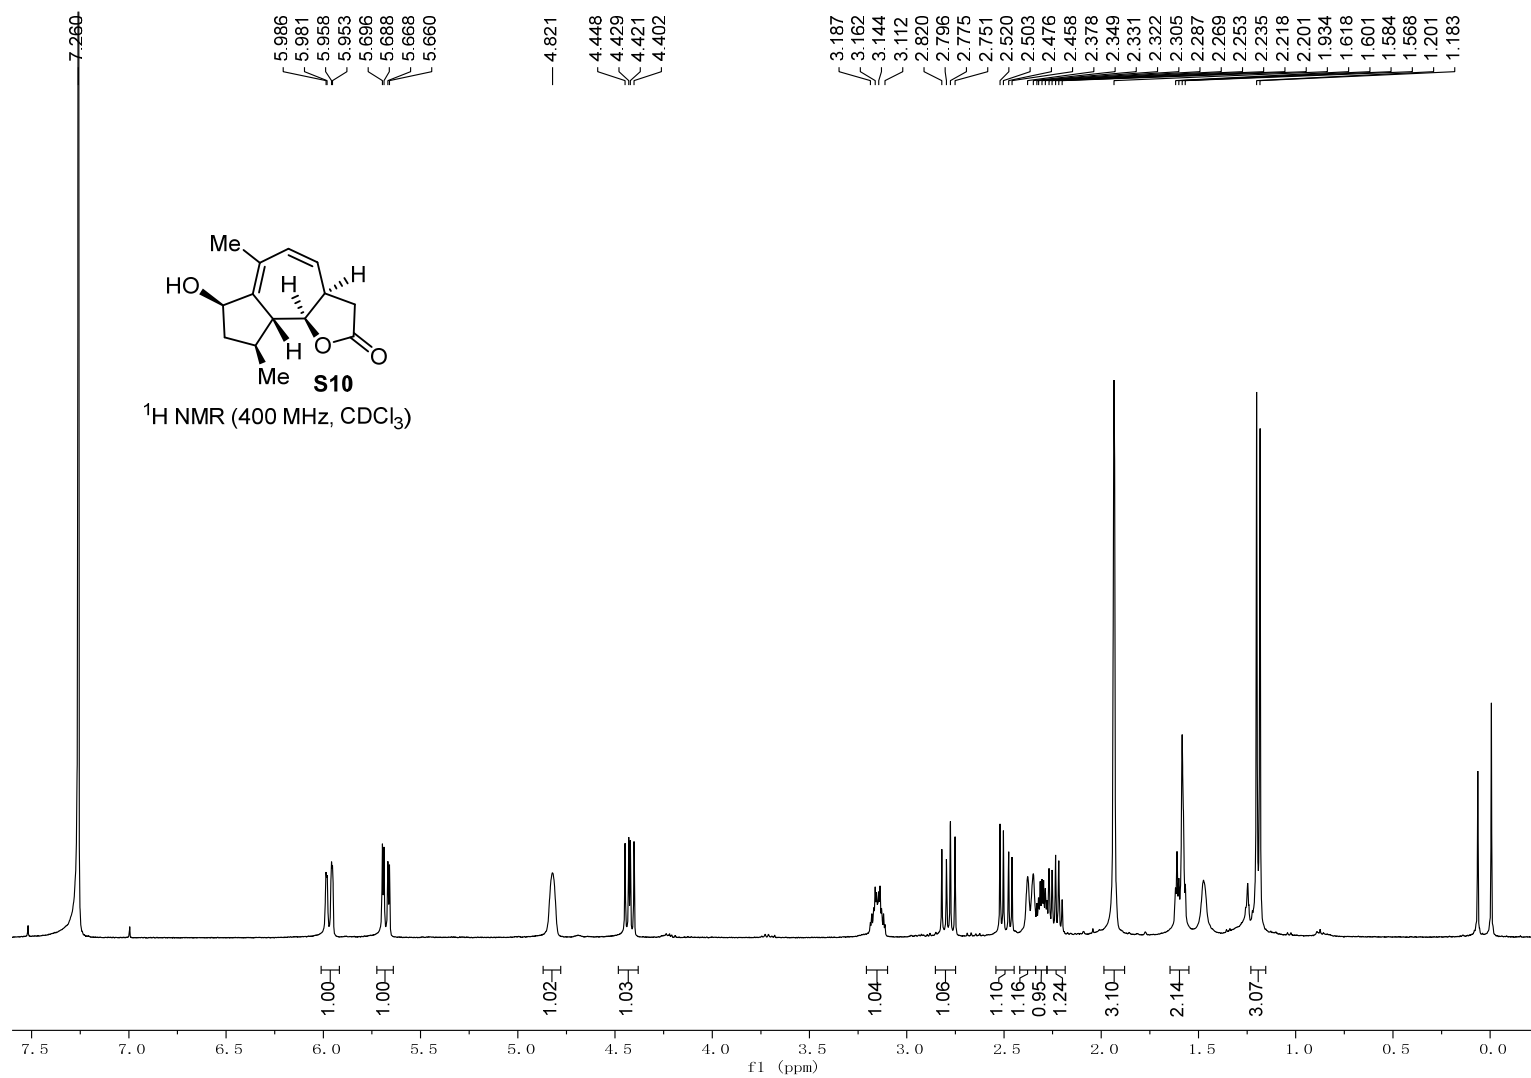

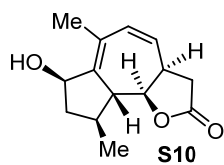

$^{13}\text{C}$  NMR (100 MHz,  $\text{CDCl}_3$ )

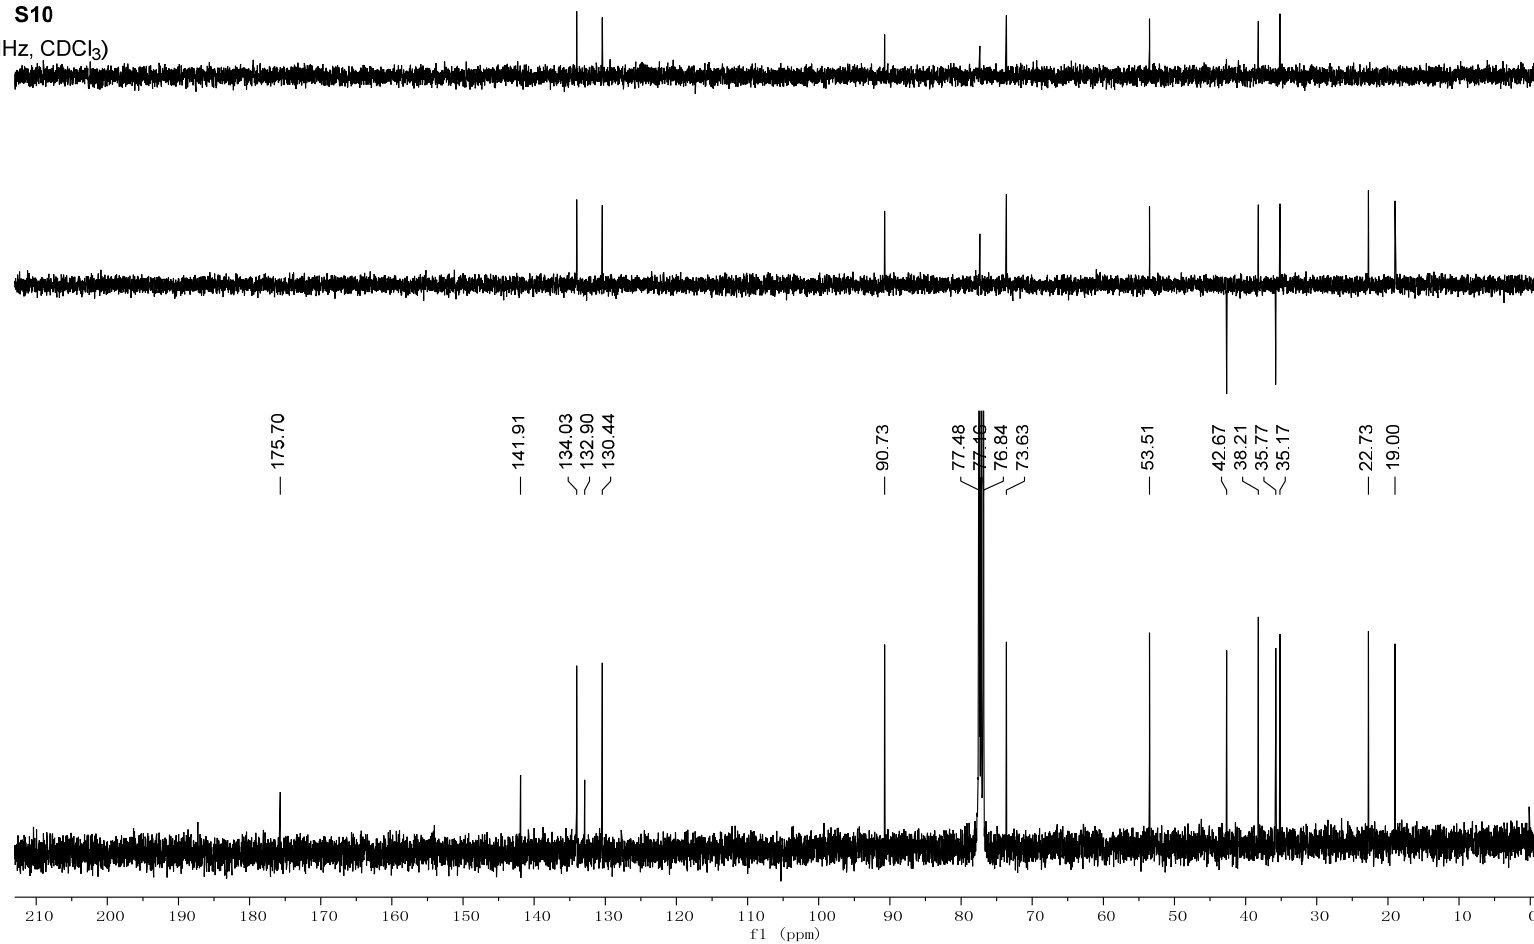

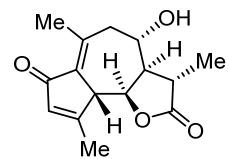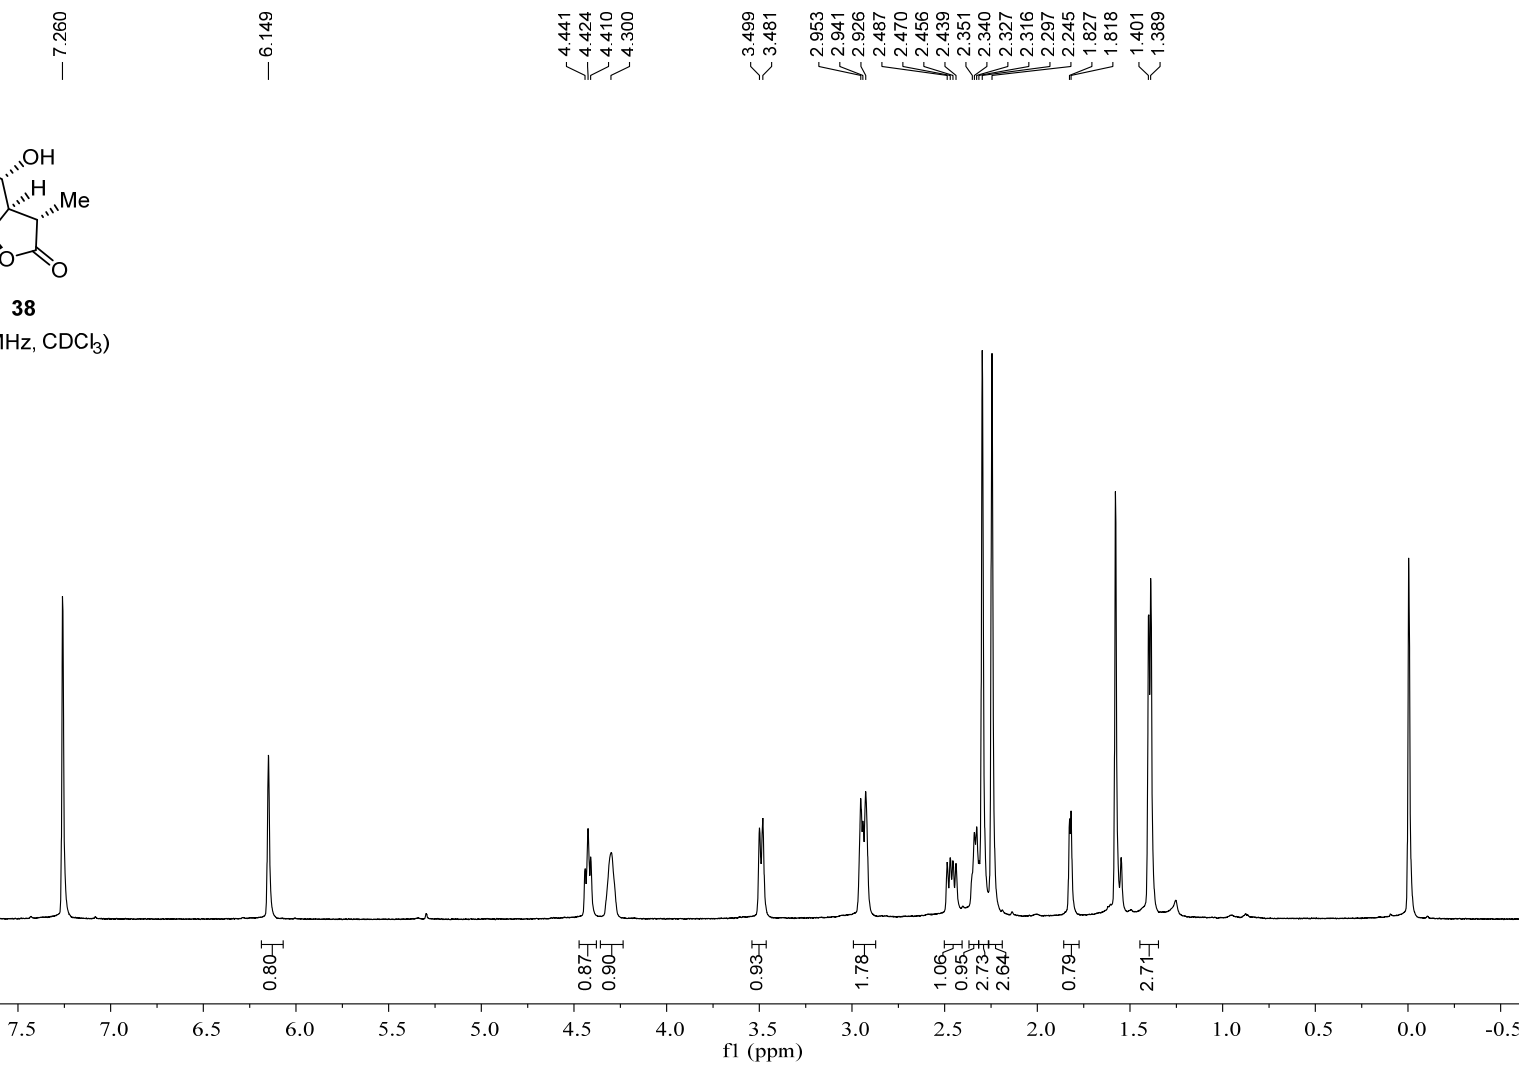

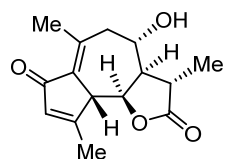

**38**

$^{13}\text{C}$  NMR (150 MHz,  $\text{CDCl}_3$ )

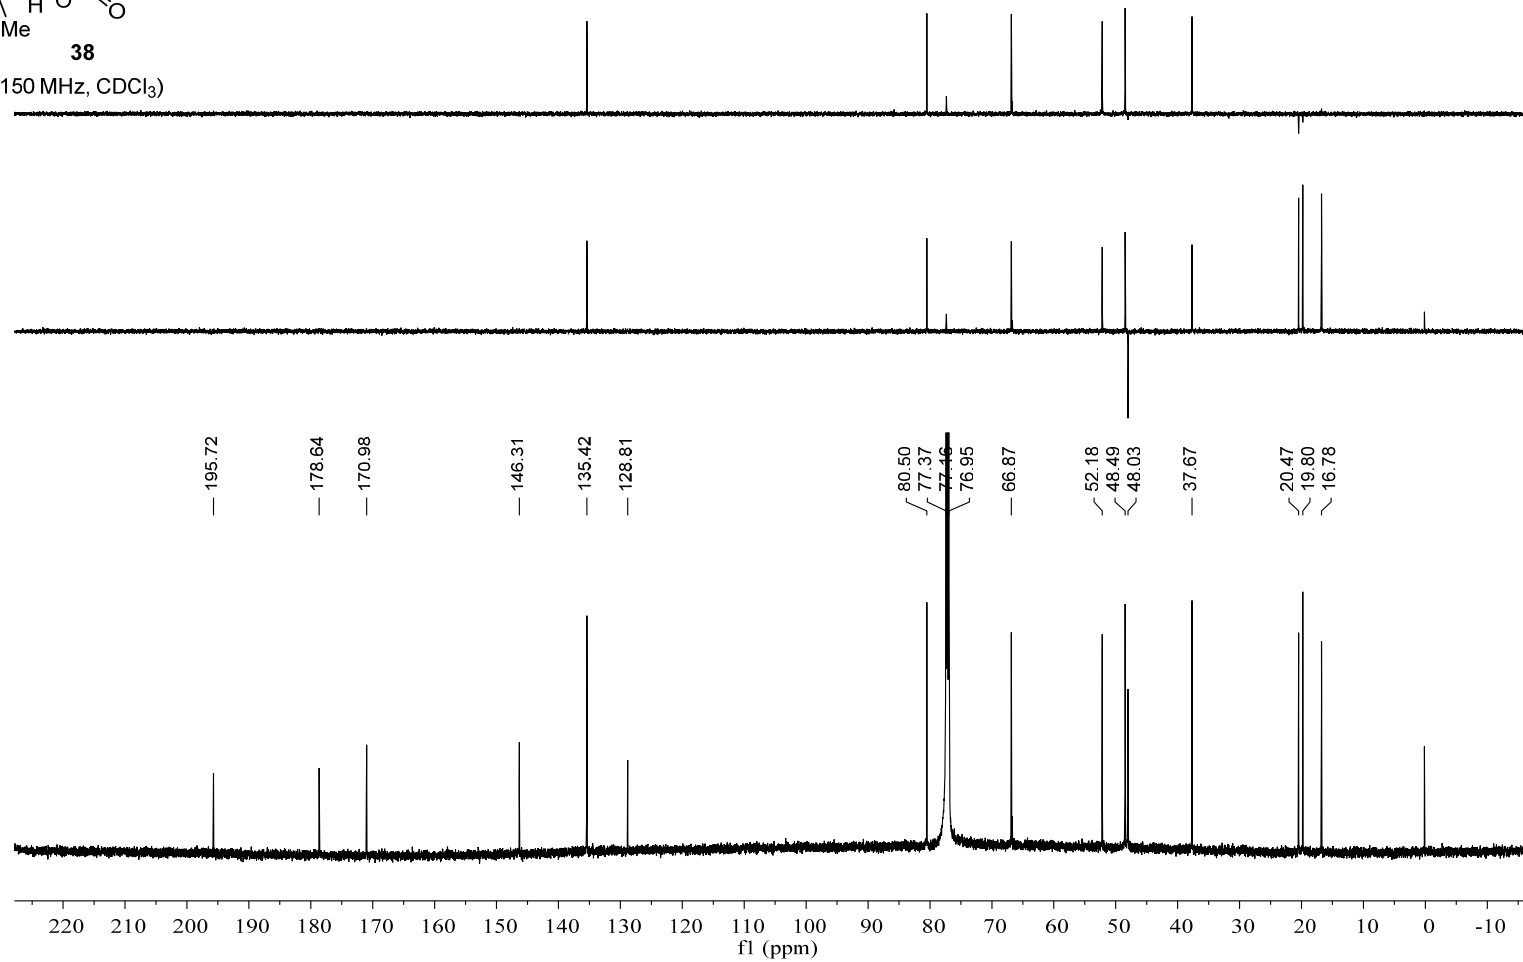

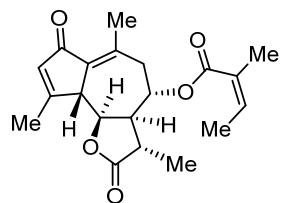

**11-*epi*-badkhyisin**

$^1\text{H}$  NMR (600 MHz,  $\text{CDCl}_3$ )

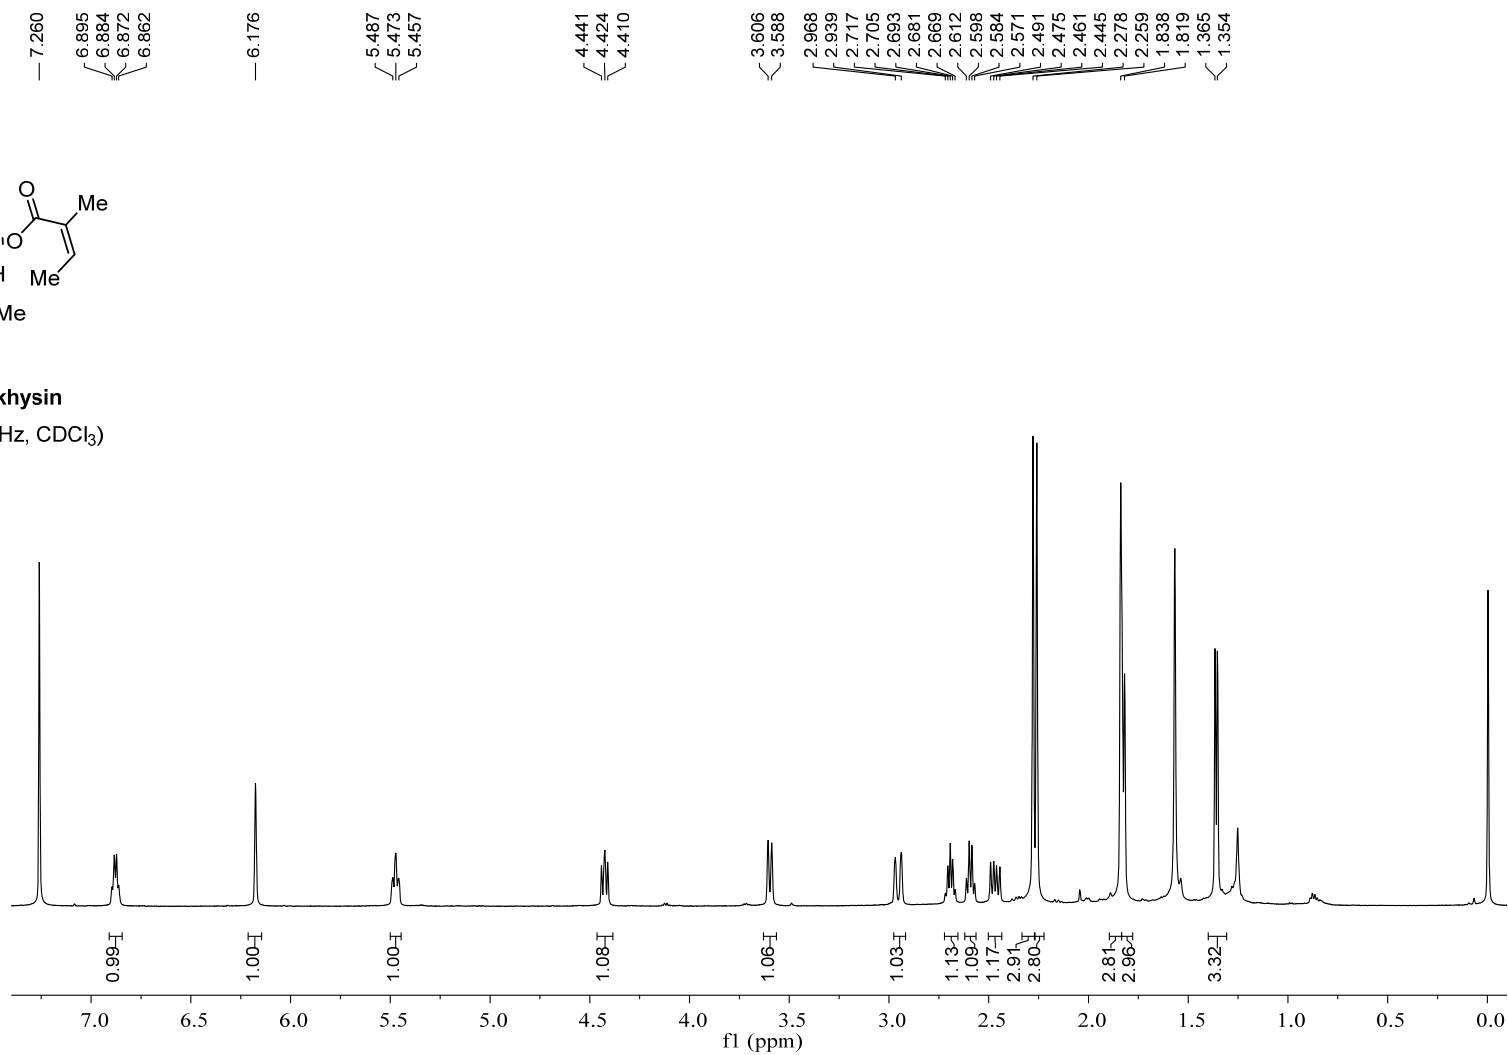

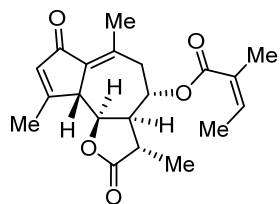

**11-*epi*-badkhyisin**

$^{13}\text{C}$  NMR (150 MHz,  $\text{CDCl}_3$ )

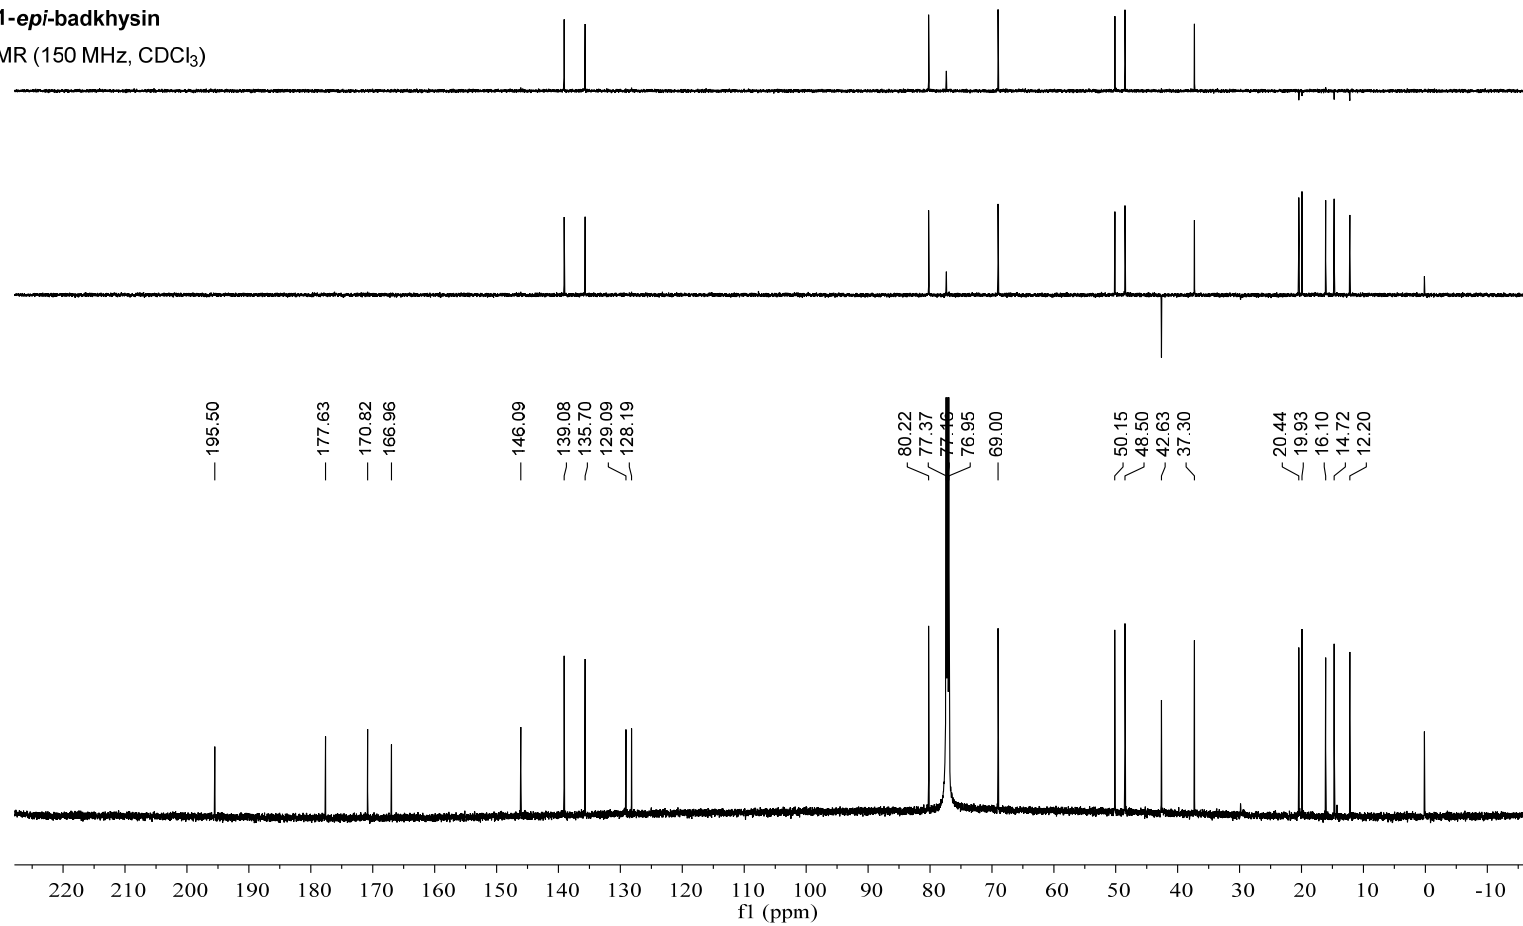

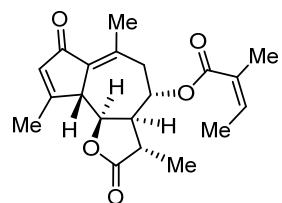

**11-*epi*-badkhyisin**

2D NMR (COSY, CDCl<sub>3</sub>)

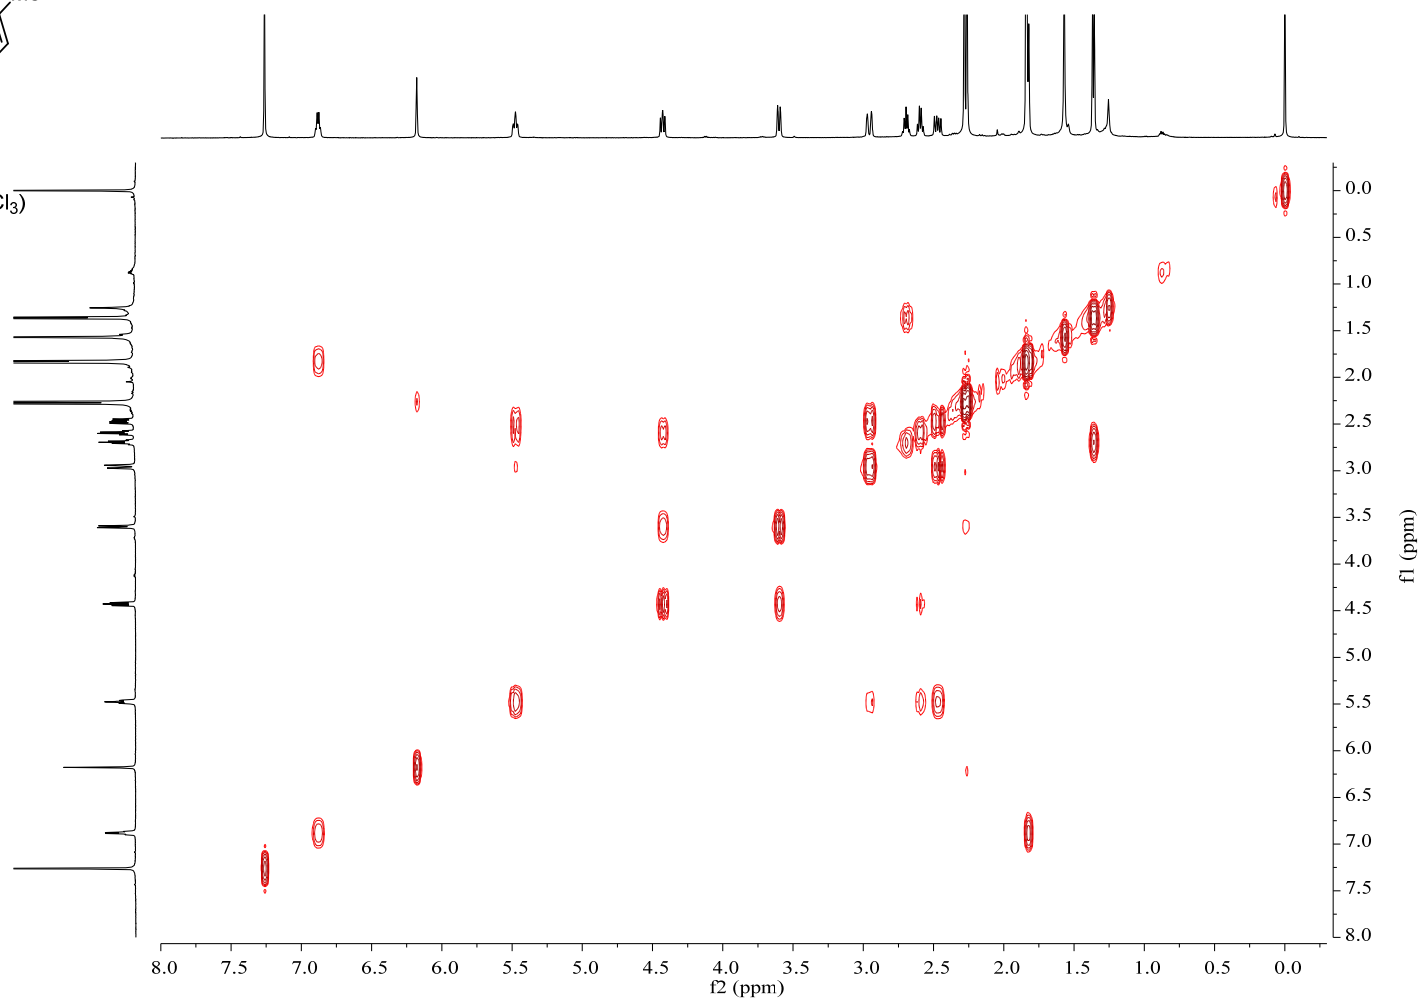

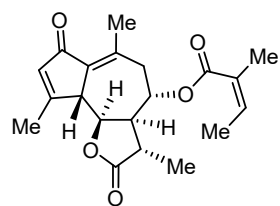

**11-*epi*-badkhyisin**

2D NMR (HSQC, CDCl<sub>3</sub>)

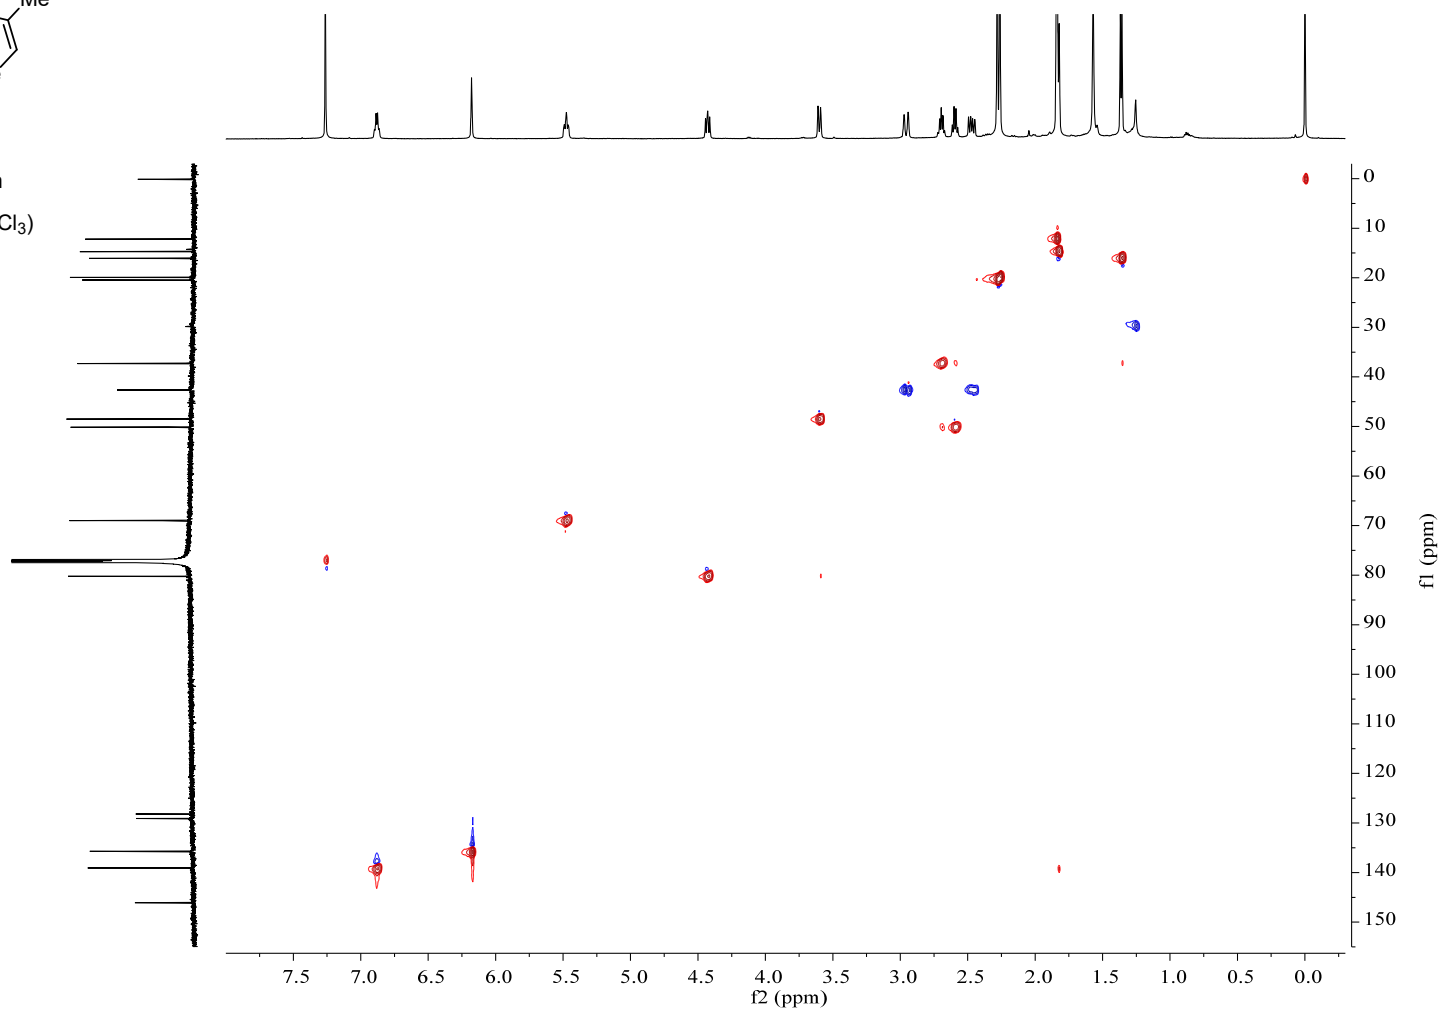

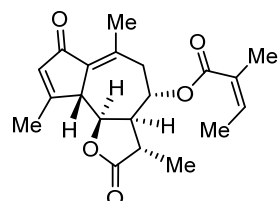

**11-*epi*-badkhyisin**

2D NMR (HMBC, CDCl<sub>3</sub>)

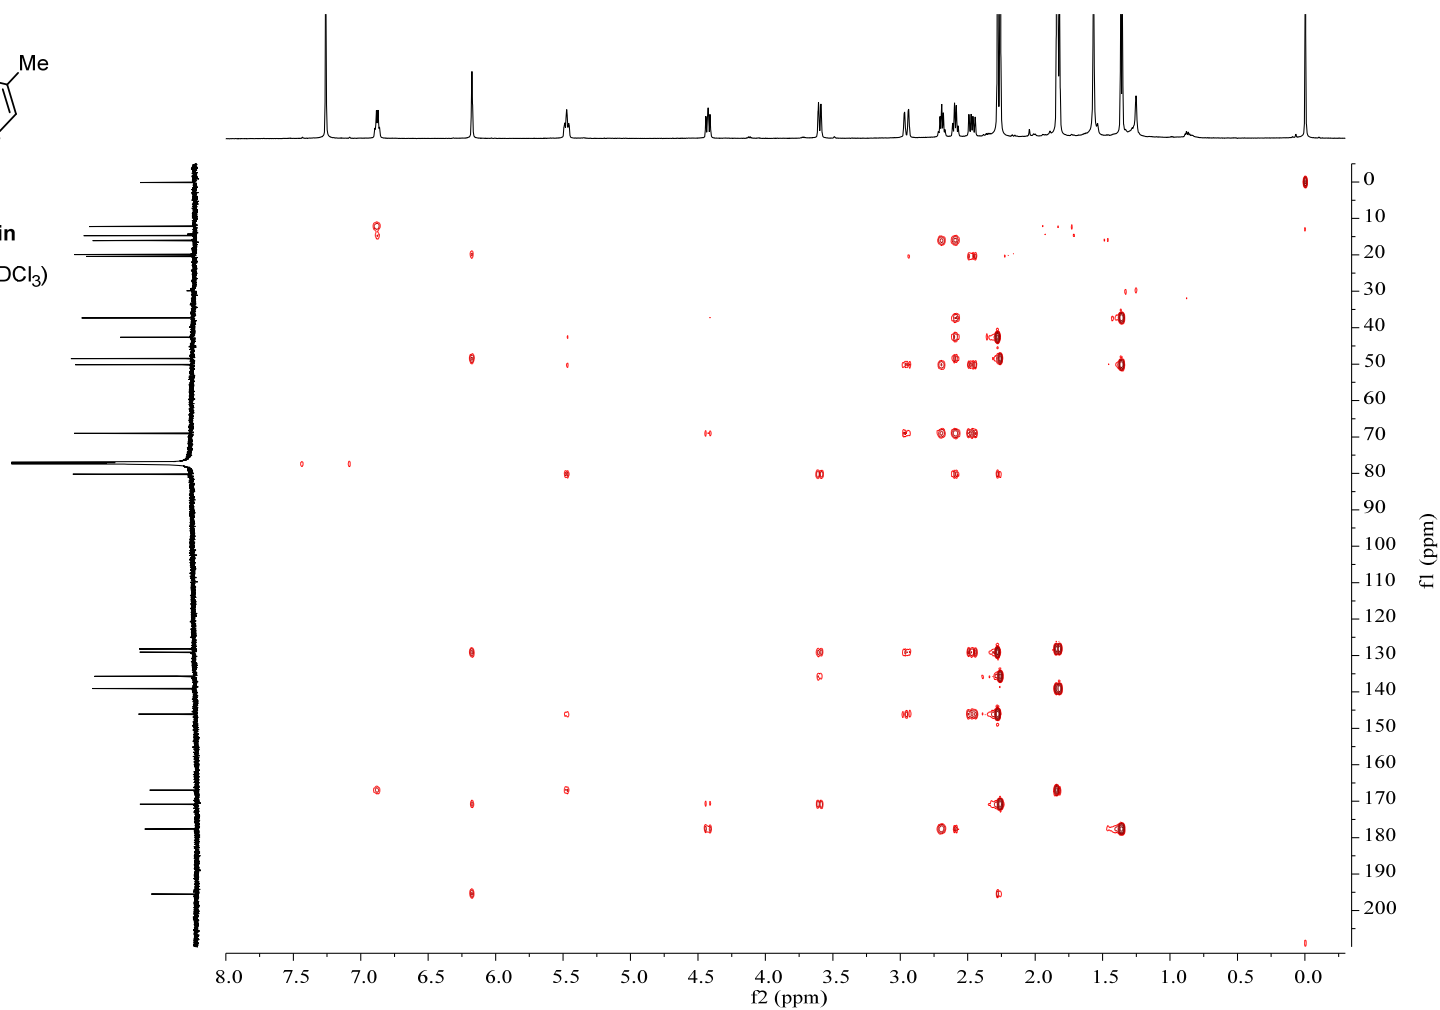

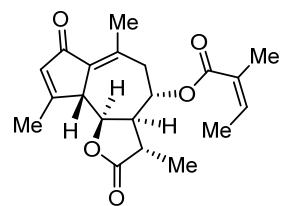

**11-epi-badkhyisin**

2D NMR (NOESY,  $\text{CDCl}_3$ )

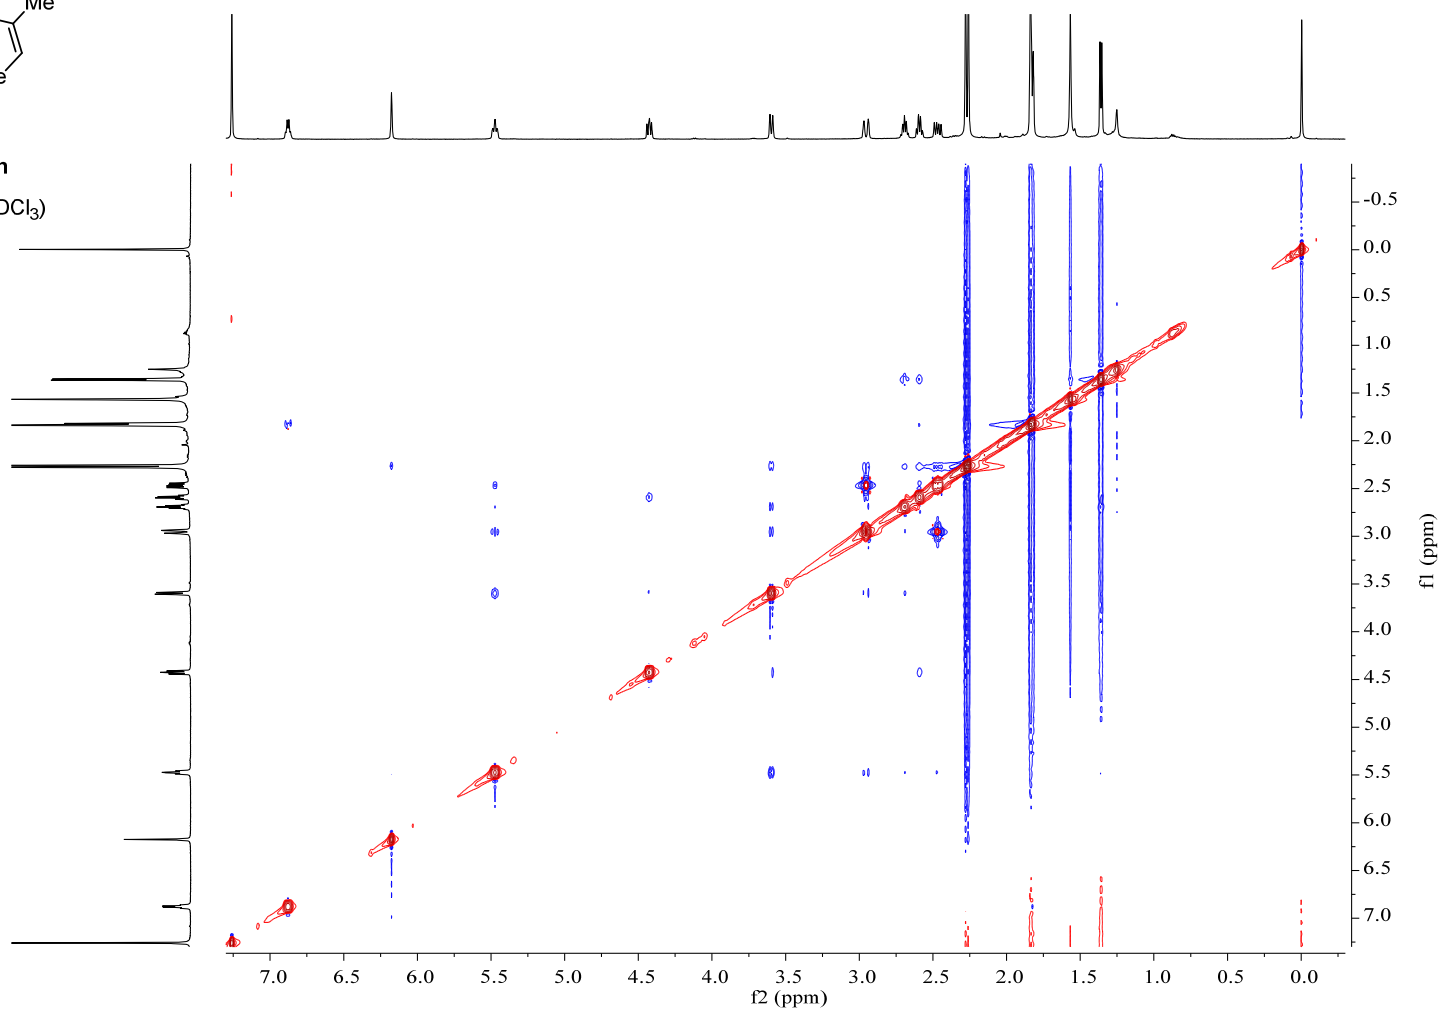

## 6. Supplementary References

1. Vaidotas Navickas, Dmitry B. Ushakov, Martin E. Maier, Markus Ströbele, and H.-Jürgen Meyer, Synthesis of the Guaianolide Ring System via Cycloaddition of a Bicyclic Carbonyl Ylide with Allyl Propiolate, *Organic Letters*, **2010**, 12, 3418-3421.
2. Martin Dračinský, Miloš Buděšínský, and Beata Warżajtis, Urszula Rychlewska, Solution and Solid-State Effects on NMR Chemical Shifts in Sesquiterpene Lactones: NMR, X-ray, and Theoretical Methods, *J. Phys. Chem. A*, **2012**, 116, 680-688.
3. Alejandro F. Barrero, M. Mar Herrador, and Pilar Arteaga, Sesquiterpene Lactones and Other Constituents of *Seseli vavilovii*, *Phytochemistry*, **1994**, 37, 1351-1358.
